# Supplementary material for: Suppression of chain transfer via a restricted rotation effect of dibenzosuberyl substituents in polymerization catalysis
Source: Royal Society of Chemistry journal article supplement (doi:10.1039/d1py00333j), 2021-01-01
Supplement: d1py00333j1.pdf [file d1py00333j1.pdf]

**Supporting Information for:**

# **Suppression of Chain Transfer via Restricted Rotation Effect of Dibenzosuberyl Substituents in Polymerization Catalysis**

Shengyu Dai\*, Gen Li, Weiqing Lu, Yudan Liao\*, Weigang Fan\*

*Institutes of Physical Science and Information Technology, Key Laboratory of  
Structure and Functional Regulation of Hybrid Materials of Ministry of Education,  
Anhui University, Hefei, Anhui, 230601, China.*

## **Table of Contents**

### **1. Figures, Tables.**

### **2. Experimental sections**

#### **2.1 General Considerations**

#### **2.2 Procedure for the Synthesis of Diarylmethanols.**

#### **2.3 Procedure for the Synthesis of Anilines A1-A5.**

#### **2.4 Procedure for the Synthesis of Ligands L1-L5.**

#### **2.5 Procedure for the Synthesis of Nickel Complexes Ni1-Ni5**

#### **2.6 Procedure for the Synthesis of Palladium Complexes Pd1-5**

### **3. Spectra Data**

#### **3.1 $^1\text{H}$ , $^{13}\text{C}$ and $^{19}\text{F}$ NMR of the Synthetic Compounds.**

#### **3.2 ESI-MS and MALDI-TOF-MS Data**

#### **3.3 $^1\text{H}$ and $^{13}\text{C}$ NMR of Polymers and Copolymers.**

#### **3.4 DSC, GPC of Polymers and Copolymers.**

### **4. References**

### **5. X-ray Crystallography**

## 1. Figures, Tables.

**Table S1. Mechanical properties.<sup>a</sup>**

| Ent. | Precat.    | <i>T</i> /°C | Strain at break (%) | Stress at break (MPa) |
|------|------------|--------------|---------------------|-----------------------|
| 1    | <b>Ni1</b> | 20           | 590                 | 29                    |
| 2    | <b>Ni1</b> | 40           | 465                 | 17                    |
| 3    | <b>Ni1</b> | 60           | 1006                | 30                    |
| 4    | <b>Ni1</b> | 80           | 1190                | 19                    |
| 5    | <b>Ni2</b> | 20           | 658                 | 18                    |
| 6    | <b>Ni2</b> | 40           | 572                 | 12                    |
| 7    | <b>Ni2</b> | 60           | 516                 | 3                     |
| 8    | <b>Ni2</b> | 80           | 1317                | 4                     |
| 9    | <b>Ni3</b> | 20           | 520                 | 13                    |
| 10   | <b>Ni3</b> | 40           | 612                 | 9                     |
| 11   | <b>Ni3</b> | 60           | 787                 | 6                     |
| 12   | <b>Ni3</b> | 80           | 799                 | 3                     |
| 13   | <b>Ni4</b> | 20           | 418                 | 28                    |
| 14   | <b>Ni4</b> | 40           | 374                 | 18                    |
| 15   | <b>Ni4</b> | 60           | 314                 | 12                    |
| 16   | <b>Ni4</b> | 80           | 550                 | 14                    |
| 17   | <b>Ni5</b> | 20           | 671                 | 15                    |
| 18   | <b>Ni5</b> | 40           | 909                 | 12                    |
| 19   | <b>Ni5</b> | 60           | 973                 | 7                     |
| 20   | <b>Ni5</b> | 80           | 2439                | 1                     |

<sup>a</sup>Conditions: performed at 10 mm/min by means of a Universal Test Machine (UTM2502) at room temperature.

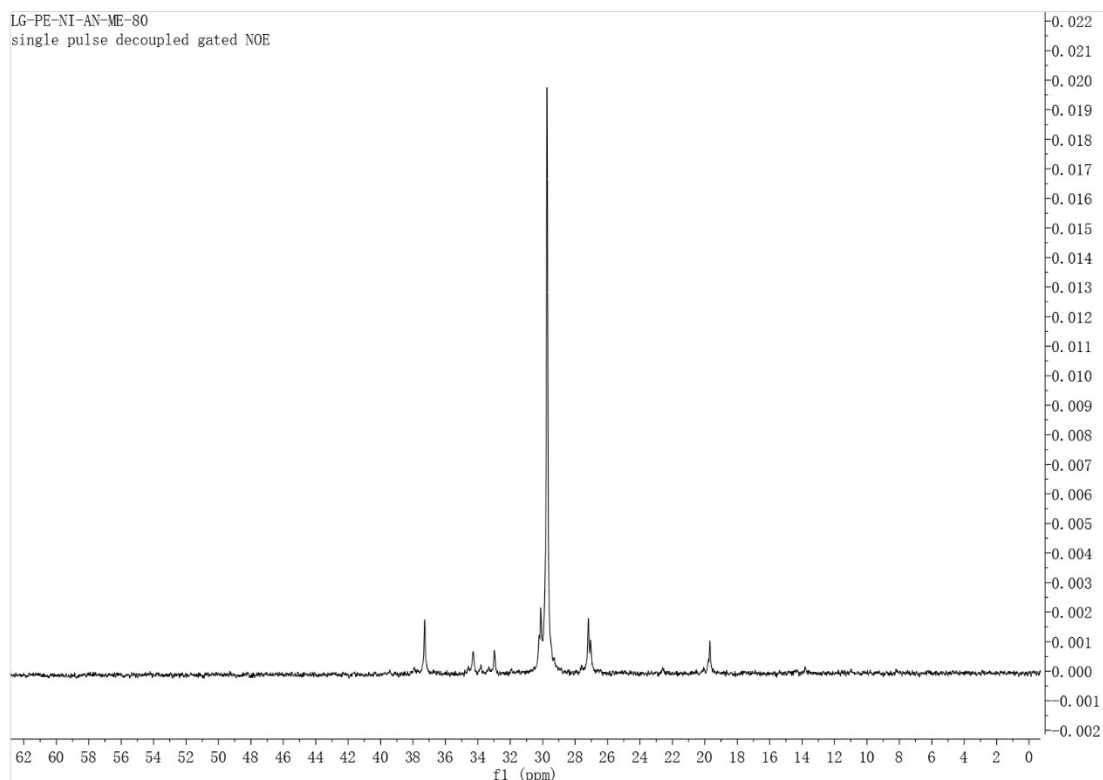

**Figure S1.**  $^{13}\text{C}$  NMR spectrum of the polymer from table 1, entry 8 ( $d^4$ -*o*-dichlorobenzene, 120  $^{\circ}\text{C}$ ).

## 2. Experimental sections

### 2.1 General Considerations

All experiments were carried out under a dry Nitrogen atmosphere using standard Schlenk techniques or in a glove-box. Solvent including dichloromethane, n-hexane and toluene were dried and distilled before. Other reagents were obtained from commercial sources and used without purification. Deuterated solvents used for NMR were dried and distilled prior to use.  $^1\text{H}$ ,  $^{13}\text{C}$ ,  $^{19}\text{F}$  NMR spectra were recorded by JNM-ECZ600R at ambient temperature unless otherwise stated. The chemical shifts of the  $^1\text{H}$  and  $^{13}\text{C}$  NMR spectra were referenced to the residual solvent; Coupling constants are in Hz. Elemental analysis was performed by the Analytical Center of the Anhui University. Mass spectra were obtained using electro spray ionization (ESI) LCMS-2010A for **A1~A5** and **L1~L5**. Mass spectra of **Ni1~Ni5** and **Pd1~Pd5** were determined on a Atouflex Speed MALDI-TOF MS. X-ray Diffraction data were collected at 298(2) K on a Bruker Smart CCD area detector with graphite-monochromated Mo  $\text{K}^{\alpha}$  radiation ( $\lambda = 0.71073 \text{ \AA}$ ). Molecular weight and molecular

weight distribution of the polymers were determined by gel permeation chromatography (GPC) with a PL 210 equipped with one Shodex AT-803S and two Shodex AT-806MS columns at 150 °C using 1, 2, 4-trichlorobenzene as a solvent and calibrated with polystyrene standards. The molecular weight and the molecular weight distribution of the polymers with good solubility at room temperature were determined by gel permeation chromatography (GPC) equipped with two linear Styragel columns (HR2 and HR4) at 40°C using THF as a solvent and calibrated with polystyrene standards, and THF was employed as the eluent at a flow rate of 1.0 mL/min.

Stress/strain experiments were performed at 10 mm/min by means of a Universal Test Machine (SUST-CMT5305) at room temperature. At least three specimens of each polymer were tested. Polymers were melt-pressed at 30 to 35°C above their melting point to obtain the test specimens. The test specimens had 14-mm gauge length, 2-mm width, and thickness of 0.5 mm. DSC was performed by a DSC Q2000 from TA Instruments. Samples were quickly heated to 150°C and kept for 5 min to remove thermal history, then cooled to 40°C at a rate of 10 K/min, and finally reheated to 150°C at the same rate under a nitrogen flow (50 mL/min). The maximum points endotherm (heating scan) were taken as the melting temperature ( $T_m$ ).

## 2.2 Procedure for the Synthesis of Diarylmethanols.

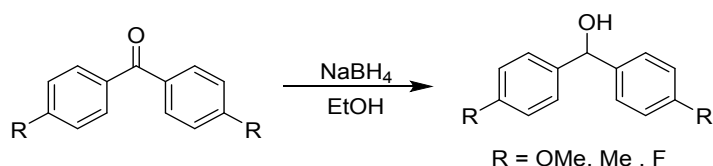

Diarylmethyl ketone (100 mmol, 1.0 equiv.) was dissolved in EtOH (300 mL),  $\text{NaBH}_4$  (3.78 g, 100 mmol, 1.0 equiv.) was then slowly added over a period of 10 min, and the mixture was stirred at room temperature overnight. 1 M HCl (aqueous, 1 mL) was added to quench the reaction, then the mixture was separated by filtration, the obtained solvent was evaporated at reduced pressure. The solid was dissolved with DCM (100 mL), then washed with water (100 mL $\times$ 3). The organic layers were dried over anhydrous  $\text{Na}_2\text{SO}_4$ , and concentrated *in vacuo*. These three compounds are known <sup>1</sup>.

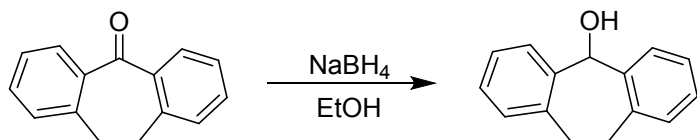

Dibenzosuberol can be obtained using the same procedure as for the synthesis of the first three alcohols. This compound is also known<sup>2</sup>. Dinaphthylmethyl alcohol was prepared by the method previously reported by our group.<sup>3</sup>

### 2.3 Procedure for the Synthesis of Anilines A1-A5.

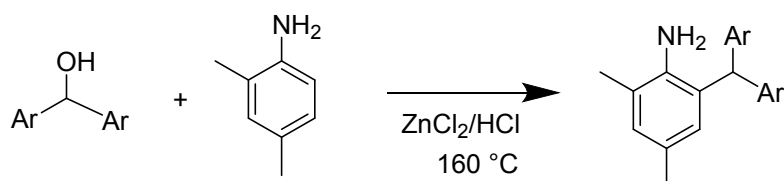

A mixture of diarylmethanol (20.0 mmol, 1.0 equiv.) and 2,4-dimethyl aniline (2.42 g, 20 mmol, 1.0 equiv.) was heated to 120 °C. A solution of anhydrous zinc chloride (1.36 g, 10 mmol, 0.5 equiv.) in concentrated hydrochloric acid (1.2 mL, 37% in H<sub>2</sub>O, 1.0 equiv.) was added to the mixture (exothermic + intense bubbling), and the temperature was raised to 160 °C. After 30 min at 160 °C, the reaction mixture was cooled to room temperature and dissolved in CH<sub>2</sub>Cl<sub>2</sub> (200 mL). The CH<sub>2</sub>Cl<sub>2</sub> layer was washed with water (3 × 100 mL) and dried over anhydrous magnesium sulfate. The solution was concentrated to 20 mL. The product **A2**, **A3**, **A5** were crashed out with 100 ml EtOH and washed with EtOH (3 × 10 mL), **A5** needs long time for crystallization and precipitation. **A1** and **A4** were purification by column chromatography.

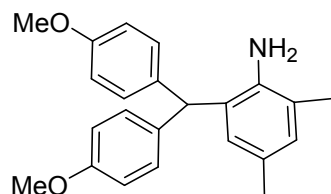

**A1** (6.13 g, 88%). <sup>1</sup>H NMR (600 MHz, CDCl<sub>3</sub>) δ 7.06 – 7.01 (m, 4H, Ar-*H*), 6.85 – 6.83 (m, 4H, Ar-*H*), 6.81 (s, 1H, Ar-*H*), 6.35 (d, *J* = 1.3 Hz, 1H, Ar-*H*), 5.37 (s, 1H, CHAr<sub>2</sub>), 3.81 (s, 6H, OCH<sub>3</sub>), 3.37 (s, br, 2H, NH<sub>2</sub>), 2.14 (s, 3H, CH<sub>3</sub>), 2.13 (s, 3H, CH<sub>3</sub>). <sup>13</sup>C NMR (151 MHz, CDCl<sub>3</sub>) δ 158.25, 139.90, 135.28, 130.48, 129.45, 129.30, 128.34, 126.90, 122.61, 113.94, 55.31 (OCH<sub>3</sub>), 50.87 (CHAr<sub>2</sub>), 20.80 (CH<sub>3</sub>), 17.77 (CH<sub>3</sub>). ESI-MS (*m/z*): calcd for C<sub>23</sub>H<sub>26</sub>NO<sub>2</sub>: 348.1964, Found, 348.1959, [M+H]<sup>+</sup>.

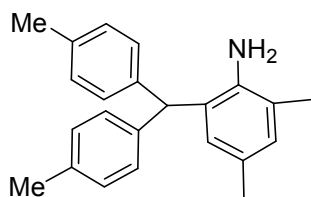

**A2** (4.01 g, 64%)  $^1\text{H}$  NMR (600 MHz,  $\text{CDCl}_3$ )  $\delta$  7.13 (d,  $J = 7.8$  Hz, 4H, Ar-*H*), 7.07 – 7.02 (m, 4H, Ar-*H*), 6.85 (s, 1H, Ar-*H*), 6.41 (s, 1H, Ar-*H*), 5.43 (s, 1H,  $\text{CHAr}_2$ ), 3.39 (s, *br*, 2H,  $\text{NH}_2$ ), 2.37 (s, 6H,  $\text{CH}_3$ ), 2.17 (s, 6H,  $\text{CH}_3$ ).  $^{13}\text{C}$  NMR (151 MHz,  $\text{CDCl}_3$ )  $\delta$  140.06, 139.97, 136.06, 129.48, 129.29, 129.07, 128.44, 126.89, 122.59, 51.83 ( $\text{CHAr}_2$ ), 21.18 ( $\text{CH}_3$ ), 20.81 ( $\text{CH}_3$ ), 17.79 ( $\text{CH}_3$ ). ESI-MS ( $m/z$ ): calcd for  $\text{C}_{23}\text{H}_{26}\text{N}$ : 316.2065, Found, 316.2063,  $[\text{M}+\text{H}]^+$ .

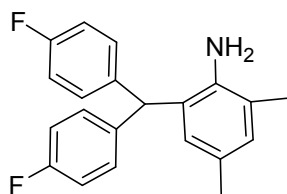

**A3** (5.76g, 89%)  $^1\text{H}$  NMR (600 MHz,  $\text{CDCl}_3$ )  $\delta$  7.09-7.01 (m, 4H, Ar-*H*), 7.01 – 6.95 (m, 4H, Ar-*H*), 6.84 (d,  $J = 13.4$  Hz, 1H, Ar-*H*), 6.27 (s, 1H, Ar-*H*), 5.43 (s, 1H,  $\text{CHAr}_2$ ), 3.32 (s, *br*, 2H,  $\text{NH}_2$ ), 2.14 (s, 3H,  $\text{CH}_3$ ), 2.12 (s, 3H,  $\text{CH}_3$ ).  $^{13}\text{C}$  NMR (151 MHz,  $\text{CDCl}_3$ )  $\delta$  162.53, 160.91, 139.75, 138.45, 138.43, 133.83, 130.98, 130.93, 129.83, 128.71, 128.26, 128.21, 127.18, 122.92, 115.56, 115.42, 50.87 ( $\text{CHAr}_2$ ), 20.73 ( $\text{CH}_3$ ), 17.75 ( $\text{CH}_3$ ).  $^{19}\text{F}$  NMR (565 MHz,  $\text{CDCl}_3$ )  $\delta$  -116.03. ESI-MS ( $m/z$ ): calcd for  $\text{C}_{21}\text{H}_{19}\text{F}_2\text{N}$ : 324.1564, Found, 324.1564,  $[\text{M}+\text{H}]^+$ .

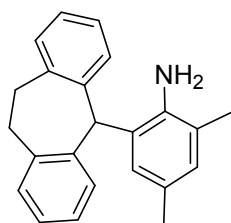

**A4** (5.58 g, 89%)  $^1\text{H}$  NMR (600 MHz,  $\text{CDCl}_3$ )  $\delta$  7.41 – 7.36 (m, 2H, Ar-*H*), 7.22 – 7.11 (m, 6H, Ar-*H*), 6.79 (s, 1H, Ar-*H*), 6.49 (s, 1H, Ar-*H*), 5.15 (s, 1H,  $\text{CHAr}_2$ ), 3.60 (s, *br*, 2H,  $\text{NH}_2$ ), 3.51 – 3.32 (m, 2H,  $\text{ArCH}_2\text{CH}_2\text{Ar}$ ), 2.79 – 2.69 (m, 2H,  $\text{ArCH}_2\text{CH}_2\text{Ar}$ ), 2.13 (s, 3H,  $\text{CH}_3$ ), 2.10 (s, 3H,  $\text{CH}_3$ ).  $^{13}\text{C}$  NMR (151 MHz,  $\text{CDCl}_3$ )  $\delta$  140.36, 140.22, 140.06,

130.99, 130.58, 129.55, 129.14, 128.03, 127.41, 126.54, 126.37, 123.13, 56.63 (CHAr<sub>2</sub>), 31.81 (ArCH<sub>2</sub>CH<sub>2</sub>Ar), 20.93 (CH<sub>3</sub>), 17.82 (CH<sub>3</sub>). ESI-MS (m/z): calcd for C<sub>23</sub>H<sub>24</sub>N: 314.1903, Found, 314.1889, [M+H]<sup>+</sup>.

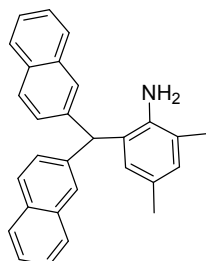

**A5** (4.6 g, 59%) <sup>1</sup>H NMR (600 MHz, CDCl<sub>3</sub>) δ 7.86 (dd, *J* = 21.2, 7.9 Hz, 4H, Ar-*H*), 7.76 (d, *J* = 7.3 Hz, 2H, Ar-*H*), 7.60 (s, 2H, Ar-*H*), 7.54 – 7.45 (m, 4H, Ar-*H*), 7.42 (d, *J* = 8.3 Hz, 2H, Ar-*H*), 6.92 (s, 1H, Ar-*H*), 6.50 (s, 1H, Ar-*H*), 5.86 (s, 1H, CHAr<sub>2</sub>), 3.37 (s, *br*, 2H, NH<sub>2</sub>), 2.21 (s, 3H, CH<sub>3</sub>), 2.17 (s, 3H, CH<sub>3</sub>). <sup>13</sup>C NMR (151 MHz, CDCl<sub>3</sub>) δ 140.43, 140.19, 133.66, 132.55, 129.86, 128.85, 128.51, 128.41, 128.32, 128.08, 128.06, 127.76, 127.18, 126.17, 125.87, 122.87, 52.79 (CHAr<sub>2</sub>), 20.82 (CH<sub>3</sub>), 17.86 (CH<sub>3</sub>). ESI-MS (m/z): calcd for C<sub>29</sub>H<sub>25</sub>N: 388.2065, Found, 388.2061, [M+H]<sup>+</sup>.

#### 2.4 Procedure for the Synthesis of Ligands L1-L5.

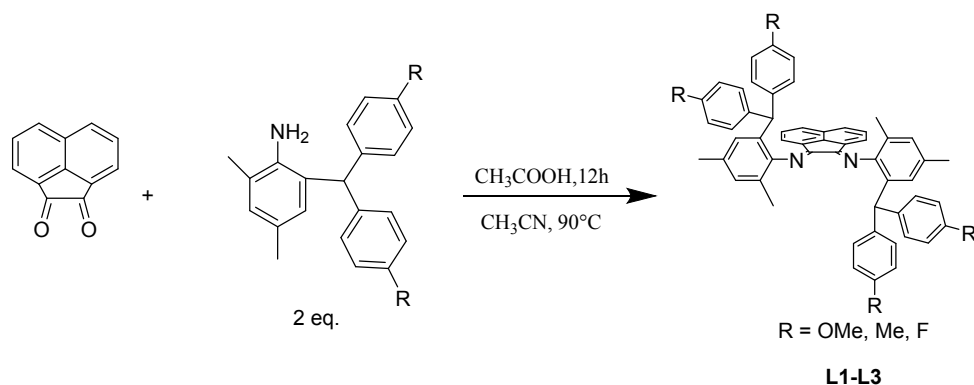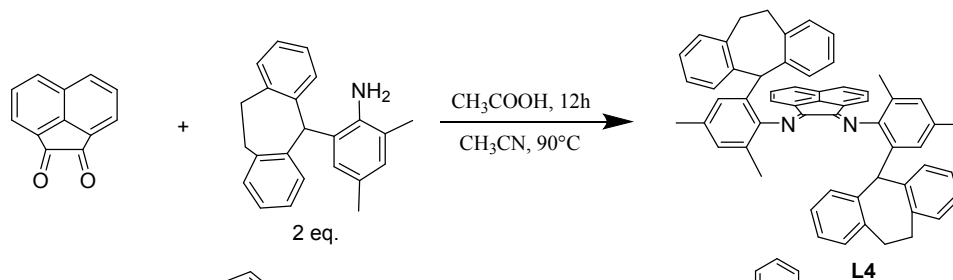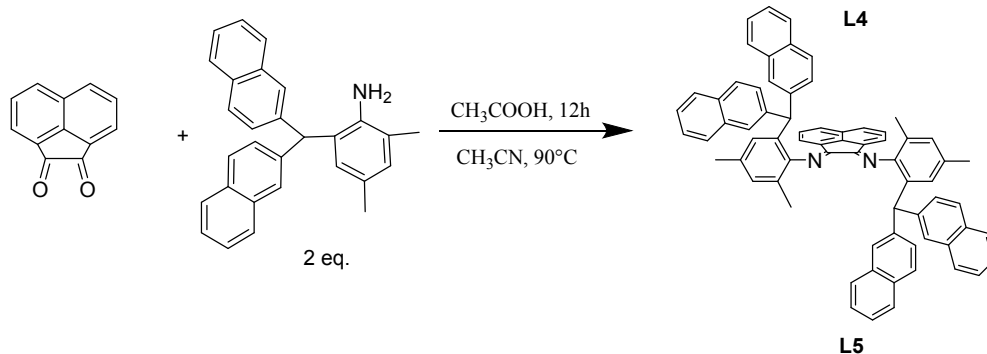

The ligands **L1-L5** can be obtained as follows: acenaphthylene-1,2-dione (0.36 g, 2 mmol, 1.0 equiv) and anilines (4.0 mmol, 2 equiv) was suspended in acetonitrile (20 mL) and acetic acid (10 mL). The mixture was allowed to stir vigorously at 90 °C for 12 hours and became reddish-brown solution. Subsequently, the solution was cooled down to room temperate and a yellow precipitate was collected by filtration. After washing the solid with 15 ml EtOH and drying in vacuum, the desired products **L1-L5** were obtained.

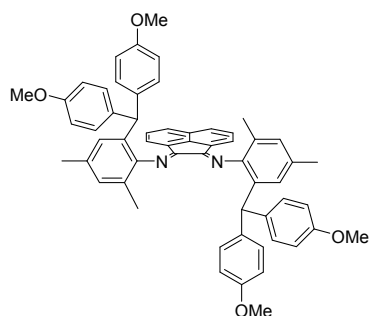

**L1** (1.23 g, 73%). The ratio of cis to trans isomers is 1:2.  $^1\text{H NMR}$  (600 MHz,  $\text{CDCl}_3$ )



$\delta$  7.72, 7.62 (d,  $J = 8.2$  Hz, d,  $J = 8.2$  Hz, 2H, Ar-*H*), 7.23 – 7.17, 7.14 – 7.09 (m, m, 2H, Ar-*H*), 7.07 (d,  $J = 8.7$  Hz, 2H, Ar-*H*), 7.02 – 6.99 (m, 3H, Ar-*H*), 6.96, 6.68 (s, s, 2H, Ar-*H*), 6.83, 6.74 – 6.71 (t,  $J = 5.7$  Hz, m, 4H, Ar-*H*), 6.80 – 6.74 (m, 5H, Ar-*H*), 6.51 (d,  $J = 7.2$  Hz, 1H, Ar-*H*), 6.11 (d,  $J = 8.5$  Hz, 3H, Ar-*H*), 6.29, 5.80 – 5.77 (d,  $J = 7.2$  Hz, m, 2H, Ar-*H*), 5.66, 5.58 (s, s, 2H, CHAr<sub>2</sub>), 3.77, 3.75 (s, s, 6H, OCH<sub>3</sub>), 3.30, 3.02 (s, s, 6H, OCH<sub>3</sub>), 2.33, 2.32 (s, s, 6H, CH<sub>3</sub>), 2.29, 2.03 (s, s, 6H, CH<sub>3</sub>). <sup>13</sup>C NMR (151 MHz, CDCl<sub>3</sub>)  $\delta$  163.10 (C=N), 162.43 (C=N), 157.85, 157.14, 156.50, 146.47, 140.08, 139.72, 136.54, 136.10, 135.35, 134.32, 133.49, 132.93, 132.90, 132.74, 130.83, 130.50, 130.27, 129.69, 129.54, 129.16, 129.08, 128.31, 128.18, 127.87, 127.45, 127.08, 124.96, 124.60, 122.83, 122.57, 113.53, 113.46, 113.15, 112.66, 55.28 (OCH<sub>3</sub>), 54.74 (OCH<sub>3</sub>), 54.47 (OCH<sub>3</sub>), 50.96 (OCH<sub>3</sub>), 50.23 (OCH<sub>3</sub>), 21.33 (ArCH<sub>3</sub>), 17.94 (ArCH<sub>3</sub>), 17.91 (ArCH<sub>3</sub>). ESI-MS ( $m/z$ ): calcd for C<sub>58</sub>H<sub>53</sub>N<sub>2</sub>O<sub>4</sub>: 841.3993, Found, 841.3994, [M+H]<sup>+</sup>.

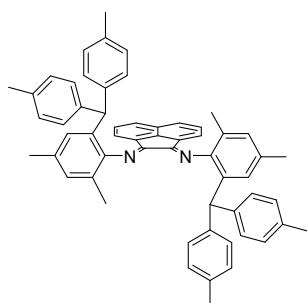

**L2** (1.34 g, 86%). The ratio of *cis* to *trans* isomers is 1:50. The minor isomer can be negligible. <sup>1</sup>H NMR (600 MHz, CDCl<sub>3</sub>)  $\delta$  7.61 (d,  $J = 8.2$  Hz, 2H, Ar-*H*), 7.11 – 6.97 (m, 12H, Ar-*H*), 6.72 – 6.66 (m, 6H, Ar-*H*), 6.29 (d,  $J = 7.1$  Hz, 2H, Ar-*H*), 6.02 (d,  $J = 7.8$  Hz, 4H, Ar-*H*), 5.60 (s, 2H, CHAr<sub>2</sub>), 2.33 (s, 6H, CH<sub>3</sub>), 2.31 (s, 6H, CH<sub>3</sub>), 2.30 (s, 6H, CH<sub>3</sub>), 1.40 (s, 6H, CH<sub>3</sub>). <sup>13</sup>C NMR (151 MHz, CDCl<sub>3</sub>)  $\delta$  163.23 (C=N), 146.57, 140.75, 139.81, 138.92, 135.38, 134.10, 133.30, 132.64, 130.76, 129.86, 129.70, 129.56, 129.08, 129.04, 128.89, 128.77, 128.03, 127.91, 127.52, 127.05, 125.08, 122.56, 51.88 (CHAr<sub>2</sub>), 21.35 (ArCH<sub>3</sub>), 21.07 (ArCH<sub>3</sub>), 20.15 (ArCH<sub>3</sub>), 17.92 (ArCH<sub>3</sub>). ESI-MS ( $m/z$ ): calcd for C<sub>58</sub>H<sub>53</sub>N<sub>2</sub>: 777.4209, Found, 773.3893, [M+H]<sup>+</sup>.

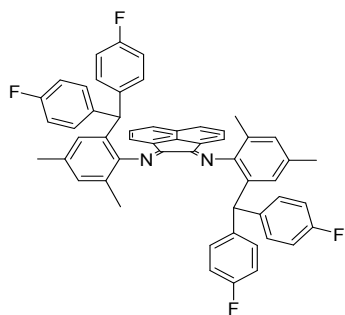

**L3** (1.20 g, 76%) The ratio of cis to trans isomers is 1:7.  $^1\text{H}$  NMR (600 MHz,  $\text{CDCl}_3$ )  $\delta$  7.78, 7.69 (d, d,  $J = 8.3$  Hz,  $J = 8.2$  Hz, 2H, Ar-*H*), 7.23 – 7.17, 7.16 – 7.10 (m, m, 2H, Ar-*H*), 7.07 – 6.73 (m, 14H, Ar-*H*), 6.69, 6.60 (s, 2H, Ar-*H*), 6.50, 6.30 (d, d,  $J = 7.2$  Hz,  $J = 7.1$  Hz, 2H, Ar-*H*), 6.33, 5.99 (t, t,  $J = 8.6$  Hz,  $J = 8.6$  Hz, 4H, Ar-*H*), 5.63, 5.62 (s, s, 2H,  $\text{CHAr}_2$ ), 2.32, 2.31 (s, s, 6H,  $\text{CH}_3$ ), 2.23, 2.03 (s, s, 6H,  $\text{CH}_3$ ).  $^{13}\text{C}$  NMR (151 MHz,  $\text{CDCl}_3$ )  $\delta$  163.18 (C=N), 161.07 (C=N), 160.61 (C=N), 159.44 (C=N), 146.30, 139.68, 139.03, 137.57, 133.17, 132.61, 131.21, 131.16, 130.96, 130.91, 129.58, 128.75, 128.66, 127.88, 127.16, 125.16, 122.53, 114.99, 114.85, 114.23, 114.08, 51.00 ( $\text{CHAr}_2$ ), 21.30 (Ar $\text{CH}_3$ ), 17.87 (Ar $\text{CH}_3$ ).  $^{19}\text{F}$  NMR (565 MHz,  $\text{CDCl}_3$ )  $\delta$  -116.94, -117.00, -117.09, -117.72. ESI-MS ( $m/z$ ): calcd for  $\text{C}_{54}\text{H}_{41}\text{F}_4\text{N}_2$ : 793.3206, Found, 793.3189,  $[\text{M}+\text{H}]^+$ .

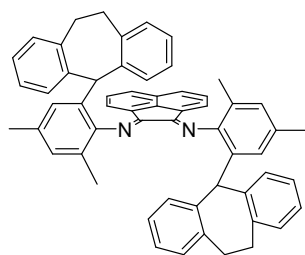

**L4** (0.23 g, 15%). Only trans isomer.  $^1\text{H}$  NMR (600 MHz,  $\text{CDCl}_3$ )  $\delta$  7.58 (d,  $J = 8.2$  Hz, 2H, Ar-*H*), 7.17 – 7.03 (m, 14H, Ar-*H*), 6.85 (s, 2H, Ar-*H*), 6.47 (d,  $J = 7.1$  Hz, 2H, Ar-*H*), 6.23 (d,  $J = 7.0$  Hz, 2H, Ar-*H*), 5.86 (t,  $J = 7.1$  Hz, 2H, Ar-*H*), 5.82 (t,  $J = 7.1$  Hz, 2H, Ar-*H*), 5.33 (s, 2H,  $\text{CHAr}_2$ ), 3.64 (td,  $J = 13.7, 4.4$  Hz, 2H, Ar $\text{CH}_2$ ), 3.35 (dt,  $J = 17.2, 4.3$  Hz, 2H, Ar $\text{CH}_2$ ), 2.85 (ddd,  $J = 17.6, 13.4, 4.7$  Hz, 2H, Ar $\text{CH}_2$ ), 2.40 (s, 6H,  $\text{CH}_3$ ), 2.31 (s, 6H,  $\text{CH}_3$ ), 2.27 (dt,  $J = 15.0, 4.8$  Hz, 2H, Ar $\text{CH}_2$ ).  $^{13}\text{C}$  NMR (151 MHz,  $\text{CDCl}_3$ )  $\delta$  164.33 (C=N), 146.16, 141.56, 140.31, 140.10, 139.30, 138.80, 131.67, 131.59, 131.36, 130.32, 129.84, 129.69, 128.49, 128.14, 126.90, 126.79, 126.36,

125.24, 125.05, 124.80, 121.62, 56.28 (Ar<sub>2</sub>CH), 33.45 (ArCH<sub>2</sub>), 30.44 (ArCH<sub>2</sub>), 21.40 (ArCH<sub>3</sub>), 18.43 (ArCH<sub>3</sub>). ESI-MS (m/z): calcd for C<sub>58</sub>H<sub>49</sub>N<sub>2</sub>: 773.3890, Found, 773.3893, [M+H]<sup>+</sup>.

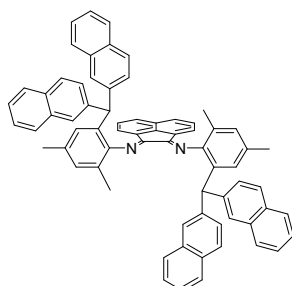

**L5** (1.43 g, 77%). The ratio of cis to trans isomers is 1:60. <sup>1</sup>H NMR (600 MHz, CDCl<sub>3</sub>) δ 7.83 – 7.74 (m, 4H, Ar-*H*), 7.55 (d, *J* = 8.1 Hz, 2H, Ar-*H*), 7.44 (dd, *J* = 8.5, 1.2 Hz, 2H, Ar-*H*), 7.40 (dd, *J* = 11.0, 4.0 Hz, 2H, Ar-*H*), 7.37 – 7.33 (m, 4H, Ar-*H*), 7.15 (s, 2H, Ar-*H*), 7.09 (dt, *J* = 14.5, 4.5 Hz, 4H, Ar-*H*), 7.00 (d, *J* = 8.1 Hz, 2H, Ar-*H*), 6.96 – 6.90 (m, 4H, Ar-*H*), 6.85 – 6.75 (m, 8H, Ar-*H*), 6.62 – 6.58 (m, 2H, Ar-*H*), 6.09 (d, *J* = 7.0 Hz, 2H, Ar-*H*), 5.94 (s, 2H, CHAr<sub>2</sub>), 2.41 (s, 6H, CH<sub>3</sub>), 2.32 (s, 6H, CH<sub>3</sub>). <sup>13</sup>C NMR (151 MHz, CDCl<sub>3</sub>) δ 163.43 (C=N), 146.81, 141.41, 139.14, 138.88, 133.25, 132.86, 132.60, 132.55, 132.15, 131.08, 129.50, 128.78, 128.67, 128.21, 128.05, 127.95, 127.80, 127.71, 127.63, 127.60, 127.54, 126.72, 126.68, 126.13, 125.81, 125.54, 125.14, 124.55, 121.73, 52.73 (Ar<sub>2</sub>CH), 21.34 (ArCH<sub>3</sub>), 18.31 (ArCH<sub>3</sub>). ESI-MS (m/z): calcd for C<sub>70</sub>H<sub>53</sub>N<sub>2</sub>: 921.4203, Found, 921.4207, [M+H]<sup>+</sup>.

## 2.5 Procedure for the Synthesis of Nickel Complexes Ni1-Ni5

Ligand (0.30 mmol) and (DME)NiBr<sub>2</sub> (93 mg, 0.3 mmol) was added to 10 mL of CH<sub>2</sub>Cl<sub>2</sub> in a Schlenk tube under a nitrogen atmosphere. The resulting mixture was stirred at room temperature for 12 h. The solvent was removed under reduced pressure, resulting in a red solid which was washed with 3×10 mL of n-hexane and dried under vacuum. The product was isolated as red powder.

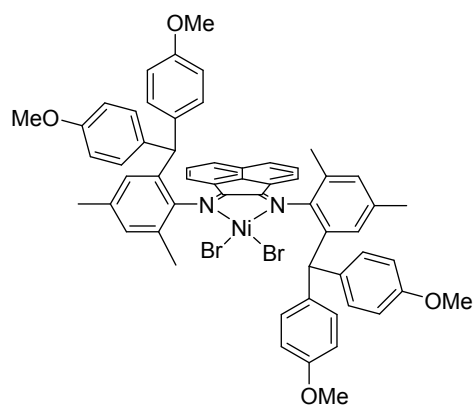

**Ni1:** (0.28 g, 88%). Anal. Calcd for (C<sub>58</sub>H<sub>52</sub>Br<sub>2</sub>N<sub>2</sub>NiO<sub>4</sub>): C, 65.75; H, 4.95; N, 2.64. Found: C, 65.68; H, 5.03; N, 2.56. MALDI-TOF-MS (m/z): calcd for C<sub>58</sub>H<sub>52</sub>BrN<sub>2</sub>NiO<sub>4</sub>:979.21, Found, 979.24, [M-Br]<sup>+</sup>.

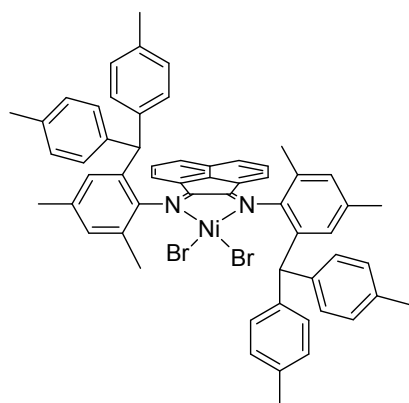

**Ni2:** (0.27 g, 91%). Anal. Calcd for (C<sub>58</sub>H<sub>52</sub>Br<sub>2</sub>N<sub>2</sub>Ni): C, 69.97; H, 5.26; N, 2.81. Found: C, 69.78; H, 5.12; N, 2.73. MALDI-TOF-MS (m/z): calcd for C<sub>58</sub>H<sub>52</sub>BrN<sub>2</sub>Ni: 915.38, Found, 915.27, [M-Br]<sup>+</sup>.

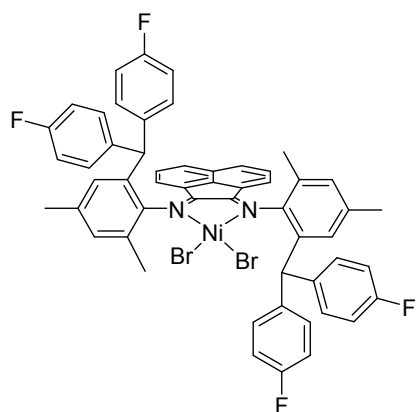

**Ni3:** (0.21 g, 69%). Anal. Calcd for (C<sub>54</sub>H<sub>40</sub>Br<sub>2</sub>F<sub>4</sub>N<sub>2</sub>Ni): C, 64.13; H, 3.99; N, 2.77. Found: C, 64.34; H, 4.16; N, 2.84. MALDI-TOF-MS (m/z): calcd for C<sub>54</sub>H<sub>40</sub>BrF<sub>4</sub>N<sub>2</sub>Ni: 929.20, Found, 929.17, [M-Br]<sup>+</sup>.

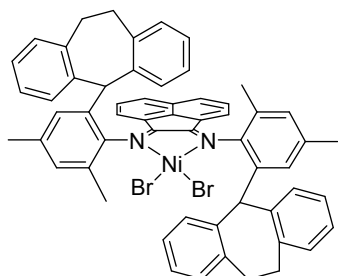

**Ni4:** (0.25 g, 85%). Anal. Calcd for (C<sub>58</sub>H<sub>48</sub>Br<sub>2</sub>N<sub>2</sub>Ni): C, 70.26; H, 4.88; N, 2.83. Found: C, 70.34; H, 4.81; N, 2.72. MALDI-TOF-MS (m/z): calcd for C<sub>58</sub>H<sub>48</sub>BrN<sub>2</sub>Ni: 909.34, Found, 909.24, [M-Br]<sup>+</sup>.

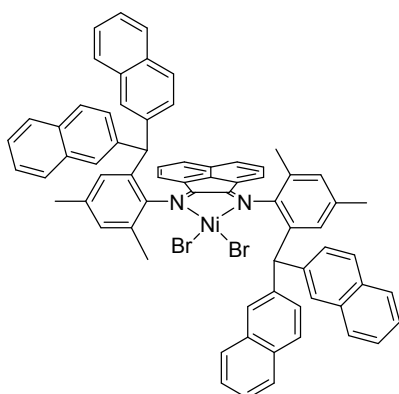

**Ni5:** (0.26 g, 75%). Anal. Calcd for (C<sub>70</sub>H<sub>52</sub>Br<sub>2</sub>N<sub>2</sub>Ni): C, 73.77; H, 4.68; N, 2.46. Found: C, 73.87; H, 4.76; N, 2.54. MALDI-TOF-MS (m/z): calcd for C<sub>70</sub>H<sub>52</sub>BrN<sub>2</sub>Ni: 1059.26, Found, 1059.26, [M-Br]<sup>+</sup>.

## 2.6 Procedure for the Synthesis of Palladium Complexes Pd1-5

A mixture of the ligand (1 mmol), Pd(COD)MeCl (265 mg, 1 mmol) in CH<sub>2</sub>Cl<sub>2</sub> (20 mL) was stirred for 1 day at room temperature. During stirring, the color of the solution was deepening. At the end of the reaction, the solution was concentrated to 5 mL. The product was crashed out with 20 ml ether and washed with ether (3 × 5 mL). Then dried under reduced pressure at room temperature for about 5 h. The pure compound was isolated as red powder.

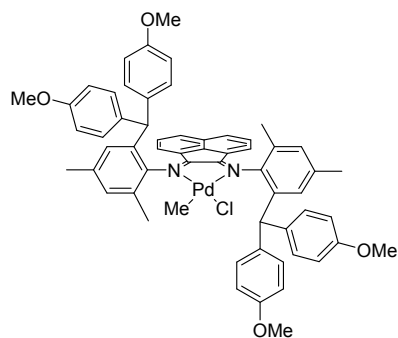

**Pd1:** (0.86 g, 86%), The ratio of cis to trans isomers is 1:7.  $^1\text{H}$  NMR (600 MHz,  $\text{CDCl}_3$ )  $\delta$  7.79 (d,  $J = 5.9$  Hz, 1H, Ar-*H*), 7.75 (d,  $J = 9.8$  Hz, 1H, Ar-*H*), 7.40 – 7.38, 7.29 – 7.28 (m, 2H, Ar-*H*), 7.21 – 7.15 (m, 2H, Ar-*H*), 7.12 (s, 1H, Ar-*H*), 7.06 (s, 1H, Ar-*H*), 7.00 (d,  $J = 9.0$  Hz, 2H, Ar-*H*), 6.87 (d,  $J = 9.0$  Hz, 2H, Ar-*H*), 6.83 – 6.78 (m, 6H, Ar-*H*), 6.73 – 6.69 (m, 2H, Ar-*H*), 6.35 (s, 1H,  $\text{CHAr}_2$ ), 6.30 (d,  $J = 3.2$  Hz, 1H, Ar-*H*), 6.13 (d,  $J = 3.2$  Hz, 1H, Ar-*H*), 6.08 (s, 1H,  $\text{CHAr}_2$ ), 5.92 – 5.75 (m, 4H, Ar-*H*), 3.78, 3.77, 3.76, 3.32, 3.16, 3.11, 2.99, 2.97, 2.96 (s, 12H,  $\text{OCH}_3$ ), 2.48, 2.45, 2.44, 2.37, 2.33, 2.31, 2.19, 2.18 (s, 12H,  $\text{CH}_3$ ), 1.26, 1.02 (s, 3H, Pd- $\text{CH}_3$ ).  $^{13}\text{C}$  NMR (151 MHz,  $\text{CDCl}_3$ )  $\delta$  173.67 (C=N), 168.98 (C=N), 158.18, 157.96, 156.77, 156.61, 143.06, 141.31, 140.51, 137.02, 136.98, 136.51, 135.91, 135.61, 134.62, 134.30, 133.40, 131.21, 131.00, 130.98, 130.91, 130.51, 129.94, 129.77, 129.74, 129.47, 129.40, 129.07, 128.72, 128.24, 127.80, 127.73, 127.35, 126.17, 125.73, 124.12, 124.07, 113.60, 113.41, 113.03, 112.82, 55.32 ( $\text{OCH}_3$ ), 54.45 ( $\text{OCH}_3$ ), 51.05 ( $\text{CHAr}_2$ ), 50.76 ( $\text{CHAr}_2$ ), 21.53 ( $\text{CH}_3$ ), 21.50 ( $\text{CH}_3$ ), 18.31 ( $\text{CH}_3$ ), 18.09 ( $\text{CH}_3$ ), 3.55 (Pd- $\text{CH}_3$ ). Anal. Calcd for ( $\text{C}_{59}\text{H}_{55}\text{ClN}_2\text{O}_4\text{Pd}$ ): C, 71.01; H, 5.56; N, 2.81. Found: C, 70.86; H, 5.47; N, 2.66. MALDI-TOF-MS ( $m/z$ ): calcd for  $\text{C}_{58}\text{H}_{52}\text{N}_2\text{O}_4\text{Pd}$ : 946.30, found: 946.07 [ $\text{M-Me-Cl}$ ] $^+$ .

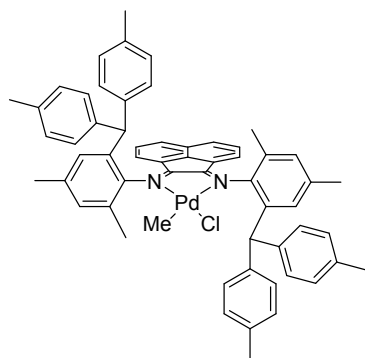

**Pd2:** (0.85 g, 91%), The ratio of cis to trans isomers is 1:50.  $^1\text{H}$  NMR (600 MHz,  $\text{CDCl}_3$ )  $\delta$  7.77 (d,  $J = 8.3$  Hz, 1H, Ar-*H*), 7.73 (d,  $J = 8.3$  Hz, 1H, Ar-*H*), 7.25 (d,  $J = 8.2$  Hz, 2H, Ar-*H*), 7.19 – 7.11 (m, 3H, Ar-*H*), 7.05 (d,  $J = 8.2$  Hz, 5H, Ar-*H*), 6.98 (d,  $J = 8.0$  Hz, 2H, Ar-*H*), 6.82 (d,  $J = 8.1$  Hz, 3H, Ar-*H*), 6.78 (d,  $J = 7.9$  Hz, 2H, Ar-*H*), 6.72 (s, 1H, Ar-*H*), 6.35 (s, 1H,  $\text{CHAr}_2$ ), 6.29 (d,  $J = 7.1$  Hz, 1H, Ar-*H*), 6.12 (d,  $J = 7.2$  Hz, 1H, Ar-*H*), 6.09 (s, 1H,  $\text{CHAr}_2$ ), 6.02 (dd,  $J = 7.5, 4.7$  Hz, 4H, Ar-*H*), 2.46 (s, 3H,  $\text{CH}_3$ ), 2.45 (s, 3H,  $\text{CH}_3$ ), 2.37 (s, 3H,  $\text{CH}_3$ ), 2.33 (s, 3H,  $\text{CH}_3$ ), 2.31 (s, 3H,  $\text{CH}_3$ ), 2.30 (s, 3H,  $\text{CH}_3$ ), 1.32 (s, 3H,  $\text{CH}_3$ ), 1.31 (s, 3H,  $\text{CH}_3$ ), 1.01 (s, 3H, Pd- $\text{CH}_3$ ).  $^{13}\text{C}$  NMR (151 MHz,  $\text{CDCl}_3$ )  $\delta$  173.80 (C=N), 169.10 (C=N), 143.13, 141.42, 140.58, 140.12, 139.25, 139.01, 138.14, 136.91, 136.75, 136.24, 135.97, 135.80, 135.47, 134.68, 134.26, 130.07, 129.93, 129.73, 129.49, 129.47, 129.36, 129.17, 129.05, 128.92, 128.79, 128.71, 128.43, 128.28, 128.19, 127.80, 127.71, 127.49, 126.18, 125.73, 124.10, 51.94 ( $\text{CHAr}_2$ ), 51.67 ( $\text{CHAr}_2$ ), 21.52 ( $\text{CH}_3$ ), 21.48 ( $\text{CH}_3$ ), 21.14 ( $\text{CH}_3$ ), 21.10 ( $\text{CH}_3$ ), 20.06 ( $\text{CH}_3$ ), 18.29 ( $\text{CH}_3$ ), 18.07 ( $\text{CH}_3$ ), 3.41 (Pd- $\text{CH}_3$ ). Anal. Calcd for ( $\text{C}_{59}\text{H}_{55}\text{ClN}_2\text{Pd}$ ): C, 75.87; H, 5.94; N, 3.00. Found: C, 75.69; H, 5.91; N, 2.94. MALDI-TOF-MS ( $m/z$ ): calcd for  $\text{C}_{58}\text{H}_{52}\text{N}_2\text{Pd}$ : 882.32, found: 882.13 [ $\text{M-Me-Cl}$ ] $^+$ .

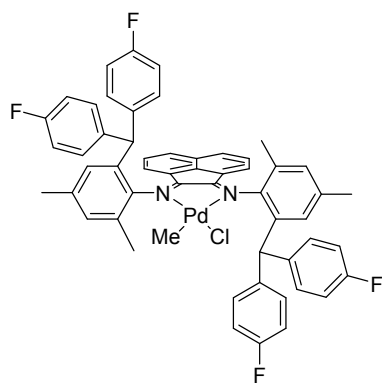

**Pd3:** (0.74 g, 78%), The ratio of cis to trans isomers is 1:3.  $^1\text{H}$  NMR (600 MHz,  $\text{CDCl}_3$ )  $\delta$  7.99, 7.87 (d, d,  $J = 8.4$  Hz,  $J = 8.3$  Hz, 1H, Ar-*H*), 7.85 – 7.30 (m, 8H, Ar-*H*), 7.30 – 6.56 (m, 14H, Ar-*H*, 1H,  $\text{CHAr}_2$ ), 6.49, 6.40 (s, s, 1H,  $\text{CHAr}_2$ ), 6.38 – 5.79 (m, 3H, Ar-*H*), 2.63, 2.61, 2.42, 2.41, 2.39, 2.38, 2.34, 2.34 (s, s, s, s, s, s, s, s, 12H,  $\text{CH}_3$ ), 1.16, 1.04 (s, s, 3H, Pd- $\text{CH}_3$ ).  $^{13}\text{C}$  NMR (151 MHz,  $\text{CDCl}_3$ )  $\delta$  173.96 (C=N), 173.65 (C=N), 169.34 (C=N), 168.94 (C=N), 163.45, 162.59, 162.48, 161.21, 161.13, 161.10, 160.90, 160.10, 160.07, 159.58, 159.47, 146.82, 145.00, 143.06, 142.14, 141.64, 141.07,

140.86, 139.92, 139.22, 138.38, 137.67, 137.49, 137.14, 136.68, 136.22, 135.82, 135.52, 133.25, 133.11, 132.57, 132.51, 132.39, 132.36, 132.16, 131.50, 131.45, 131.41, 131.35, 131.08, 131.02, 130.99, 130.95, 130.50, 130.31, 130.18, 129.90, 129.82, 129.77, 129.49, 129.34, 129.24, 129.07, 129.01, 128.76, 128.71, 128.65, 128.62, 128.55, 128.43, 128.36, 128.23, 127.99, 127.97, 127.87, 127.65, 127.54, 127.50, 126.80, 126.76, 126.73, 126.67, 126.47, 126.13, 125.99, 125.83, 125.70, 125.59, 125.55, 125.44, 125.37, 125.26, 125.15, 124.98, 124.72, 124.53, 124.09, 123.13, 123.09, 115.28, 115.14, 114.95, 114.81, 114.72, 114.58, 114.43, 114.29, 52.91 ( $\text{CHAr}_2$ ), 52.74 ( $\text{CHAr}_2$ ), 52.53 ( $\text{CHAr}_2$ ), 51.08 ( $\text{CHAr}_2$ ), 50.78 ( $\text{CHAr}_2$ ), 21.54 ( $\text{CH}_3$ ), 21.50 ( $\text{CH}_3$ ), 21.34 ( $\text{CH}_3$ ), 18.74 ( $\text{CH}_3$ ), 18.51 ( $\text{CH}_3$ ), 18.31 ( $\text{CH}_3$ ), 18.26 ( $\text{CH}_3$ ), 18.02 ( $\text{CH}_3$ ), 3.89 ( $\text{Pd-CH}_3$ ), 3.84 ( $\text{Pd-CH}_3$ ). Anal. Calcd for ( $\text{C}_{55}\text{H}_{43}\text{ClF}_4\text{N}_2\text{Pd}$ ): C, 69.55; H, 4.56; N, 2.95. Found: C, 69.34; H, 4.71; N, 2.81. MALDI-TOF-MS ( $m/z$ ): calcd for  $\text{C}_{58}\text{H}_{52}\text{N}_2\text{Pd}$ : 1024.14, found: 1024.49 [ $\text{M-Cl+Ag}$ ] $^+$ .

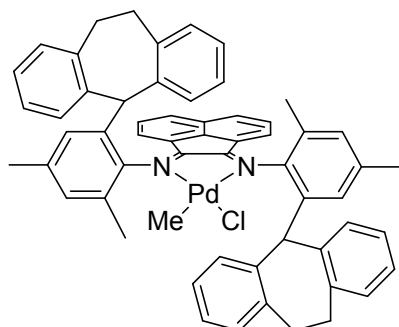

**Pd4:** (0.78 g, 84%), only trans isomer.  $^1\text{H}$  NMR (600 MHz,  $\text{CDCl}_3$ )  $\delta$  7.76 (d,  $J = 3.7$  Hz, 1H, Ar- $H$ ), 7.73 (d,  $J = 8.2$  Hz, 1H, Ar- $H$ ), 7.69 (d,  $J = 8.2$  Hz, 1H, Ar- $H$ ), 7.50 (d,  $J = 7.3$  Hz, 1H, Ar- $H$ ), 7.40 (d,  $J = 7.3$  Hz, 1H, Ar- $H$ ), 7.35 (d,  $J = 7.0$  Hz, 1H, Ar- $H$ ), 7.22 – 7.03 (m, 10H, Ar- $H$ ), 7.01 (s, 1H, Ar- $H$ ), 6.94 (s, 1H, Ar- $H$ ), 6.44 (d,  $J = 7.1$  Hz, 1H, Ar- $H$ ), 6.38 (d,  $J = 7.2$  Hz, 1H, Ar- $H$ ), 6.28 – 6.18 (m, 2H, Ar- $H$ ), 5.96 (s, 1H,  $\text{CHAr}_2$ ), 5.91 – 5.70 (m, 4H, Ar- $H$ ), 5.65 (s, 1H,  $\text{CHAr}_2$ ), 3.82 – 3.57 (m, 2H,  $\text{ArCH}_2$ ), 3.43 – 3.23 (m, 2H,  $\text{ArCH}_2$ ), 3.00 – 2.82 (m, 2H,  $\text{ArCH}_2$ ), 2.64 (s, 3H,  $\text{CH}_3$ ), 2.63 (s, 3H,  $\text{CH}_3$ ), 2.36 (s, 3H,  $\text{CH}_3$ ), 2.33 (s, 3H,  $\text{CH}_3$ ), 2.32 – 2.17 (m, 2H,  $\text{ArCH}_2$ ), 0.88 (s, 3H,  $\text{Pd-CH}_3$ ).  $^{13}\text{C}$  NMR (151 MHz,  $\text{CDCl}_3$ )  $\delta$  175.08 ( $\text{C=N}$ ), 170.50 ( $\text{C=N}$ ), 143.51, 141.92, 141.37, 141.25, 140.75, 140.57, 138.81, 138.58, 137.84, 137.27, 135.77,



134.70, 133.67, 133.02, 131.92, 131.61, 131.10, 130.72, 130.52, 130.41, 130.20, 130.16, 129.98, 129.87, 129.74, 129.63, 129.48, 129.29, 129.04, 128.97, 128.76, 127.69, 127.65, 127.48, 127.30, 126.89, 126.85, 126.74, 126.28, 125.80, 125.38, 125.22, 124.62, 123.05, 122.94, 56.11 (CHAr<sub>2</sub>), 55.87 (CHAr<sub>2</sub>), 33.72 (ArCH<sub>2</sub>), 33.48 (ArCH<sub>2</sub>), 30.30 (ArCH<sub>2</sub>), 30.17 (ArCH<sub>2</sub>), 21.60 (CH<sub>3</sub>), 21.54 (CH<sub>3</sub>), 18.96 (CH<sub>3</sub>), 18.67 (CH<sub>3</sub>), 3.18 (Pd-CH<sub>3</sub>). Anal. Calcd for (C<sub>59</sub>H<sub>51</sub>ClN<sub>2</sub>Pd): C, 76.20; H, 5.53; N, 3.01. Found: C, 76.35; H, 5.46; N, 2.98. MALDI-TOF-MS (m/z): calcd for C<sub>58</sub>H<sub>52</sub>N<sub>2</sub>Pd: 878.29, found: 878.21 [M-Me-Cl]<sup>+</sup>.

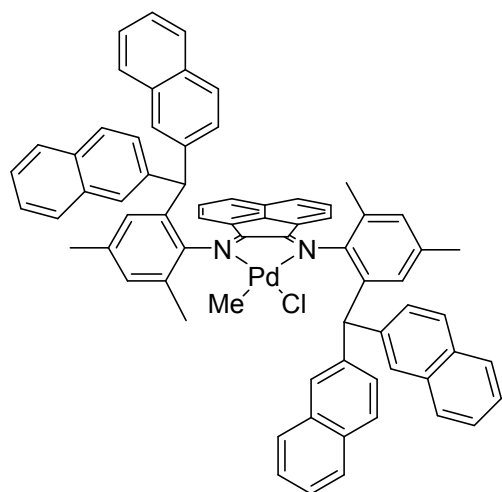

**Pd5:** (0.74 g, 79%), The ratio of cis to trans isomers is 1:60. <sup>1</sup>H NMR (600 MHz, CDCl<sub>3</sub>) δ 7.99 (d, *J* = 8.3 Hz, 1H, Ar-*H*), 7.87 – 7.77 (m, 4H, Ar-*H*), 7.58 (dd, *J* = 8.0, 4.1 Hz, 2H, Ar-*H*), 7.54 – 7.32 (m, 7H, Ar-*H*), 7.30 – 7.18 (m, 5H, Ar-*H*), 7.15 (s, 1H, Ar-*H*), 6.96 – 6.75 (m, 14H, Ar-*H*), 6.70 – 6.60 (m, 3H, , CHAr<sub>2</sub>, Ar-*H*), 6.41 (s, 1H, CHAr<sub>2</sub>), 6.07 (d, *J* = 7.0 Hz, 1H, Ar-*H*), 5.94 (d, *J* = 7.1 Hz, 1H, Ar-*H*), 2.63 (s, 3H, CH<sub>3</sub>), 2.61 (s, 3H, CH<sub>3</sub>), 2.38 (s, 3H, CH<sub>3</sub>), 2.34 (s, 3H, CH<sub>3</sub>), 1.16 (s, 3H, Pd-CH<sub>3</sub>). <sup>13</sup>C NMR (151 MHz, CDCl<sub>3</sub>) δ 173.96 (C=N), 169.33 (C=N), 142.14, 141.65, 141.08, 140.87, 139.92, 139.23, 138.38, 137.14, 136.22, 136.04, 135.52, 133.19, 133.12, 132.58, 132.51, 132.40, 132.37, 131.03, 130.96, 130.18, 129.82, 129.77, 129.49, 129.34, 129.07, 129.02, 128.71, 128.64, 128.56, 128.43, 128.37, 128.23, 128.06, 127.97, 127.87, 127.65, 126.80, 126.76, 126.74, 126.72, 126.47, 125.99, 125.83, 125.59, 125.55, 125.44, 125.37, 124.98, 124.72, 124.55, 123.13, 123.09, 52.91 (CHAr<sub>2</sub>), 52.54 (CHAr<sub>2</sub>), 21.54 (CH<sub>3</sub>), 21.50 (CH<sub>3</sub>), 18.74 (CH<sub>3</sub>), 18.50 (CH<sub>3</sub>), 3.83

(Pd-CH<sub>3</sub>). Anal. Calcd for (C<sub>71</sub>H<sub>55</sub>ClN<sub>2</sub>Pd): C, 79.10; H, 5.14; N, 2.60. Found: C, 79.21; H, 5.32; N, 2.50. MALDI-TOF-MS (m/z): calcd for C<sub>58</sub>H<sub>52</sub>N<sub>2</sub>Pd: 1026.32, found: 1026.06 [M-Me-Cl]<sup>+</sup>.

### 3. Spectra Data

#### 3.1 <sup>1</sup>H, <sup>13</sup>C and <sup>19</sup>F NMR of the Synthetic Compounds.

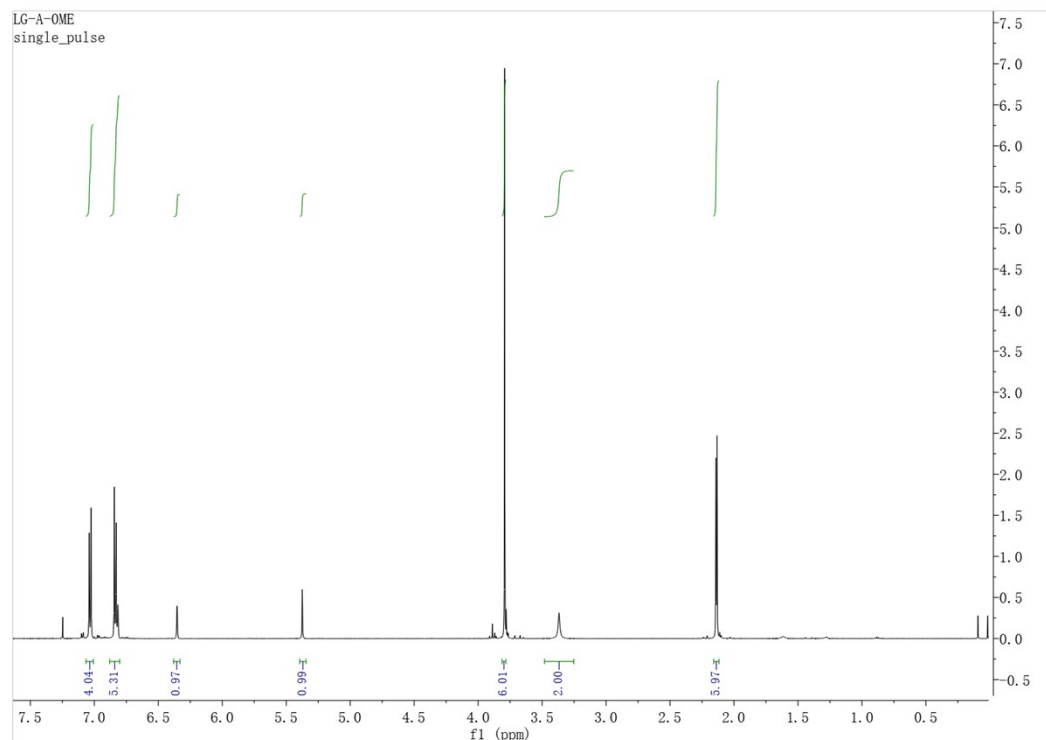

Figure S2. <sup>1</sup>H NMR spectrum of A1 in CDCl<sub>3</sub>.

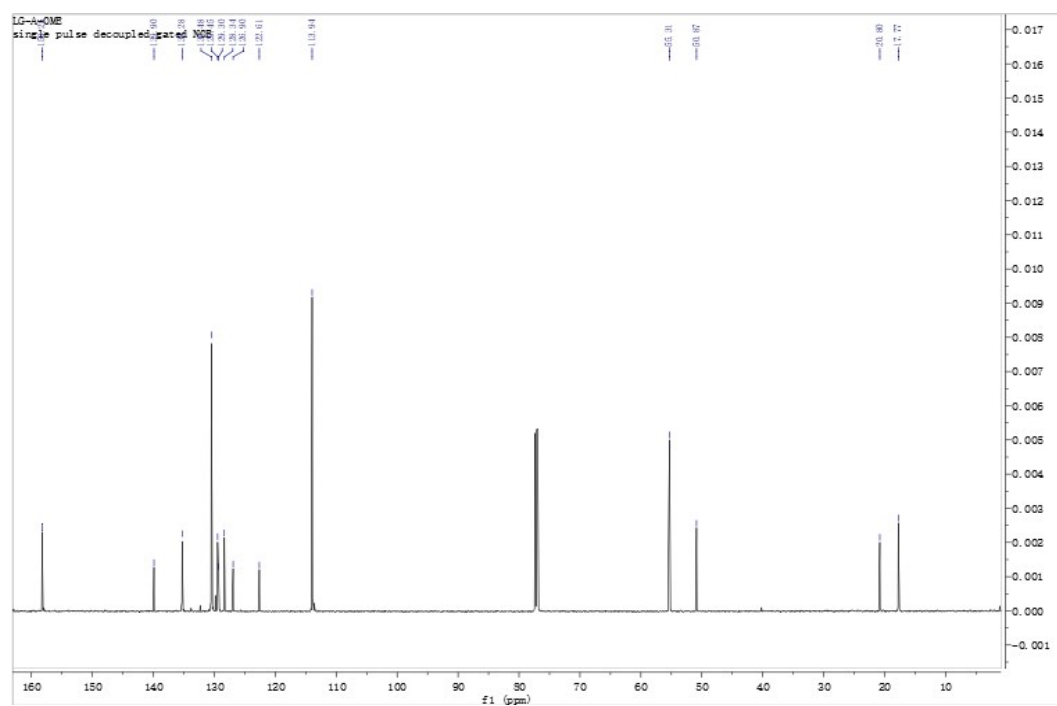

Figure S3. <sup>13</sup>C NMR spectrum of A1 in CDCl<sub>3</sub>.

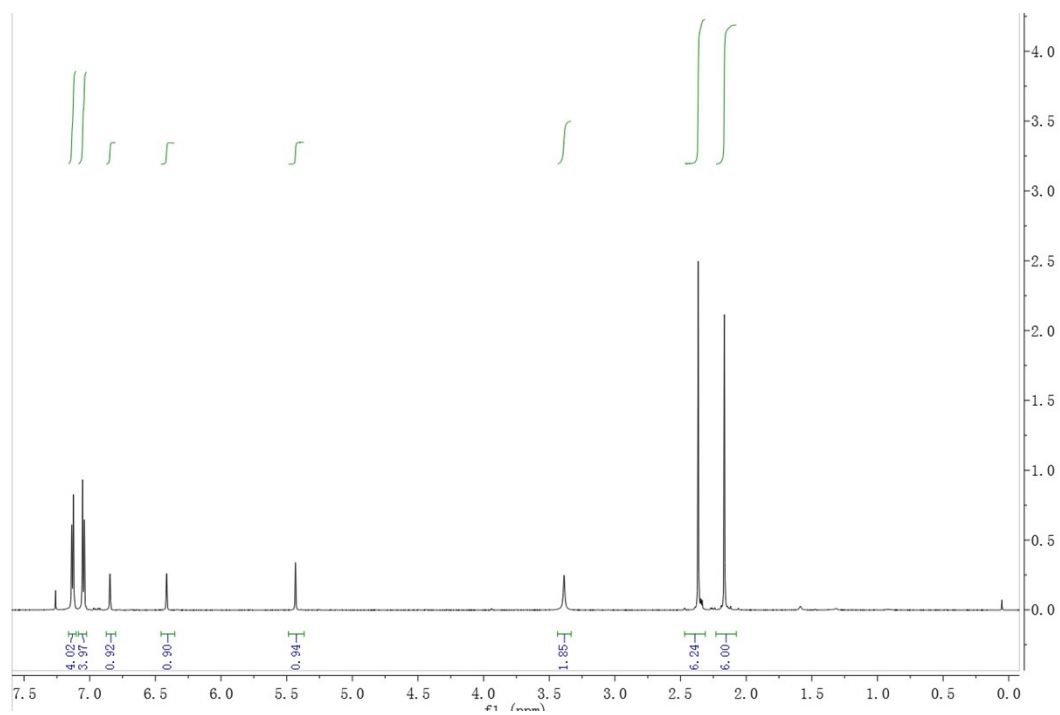

**Figure S4.**  $^1\text{H}$  NMR spectrum of A2 in  $\text{CDCl}_3$ .

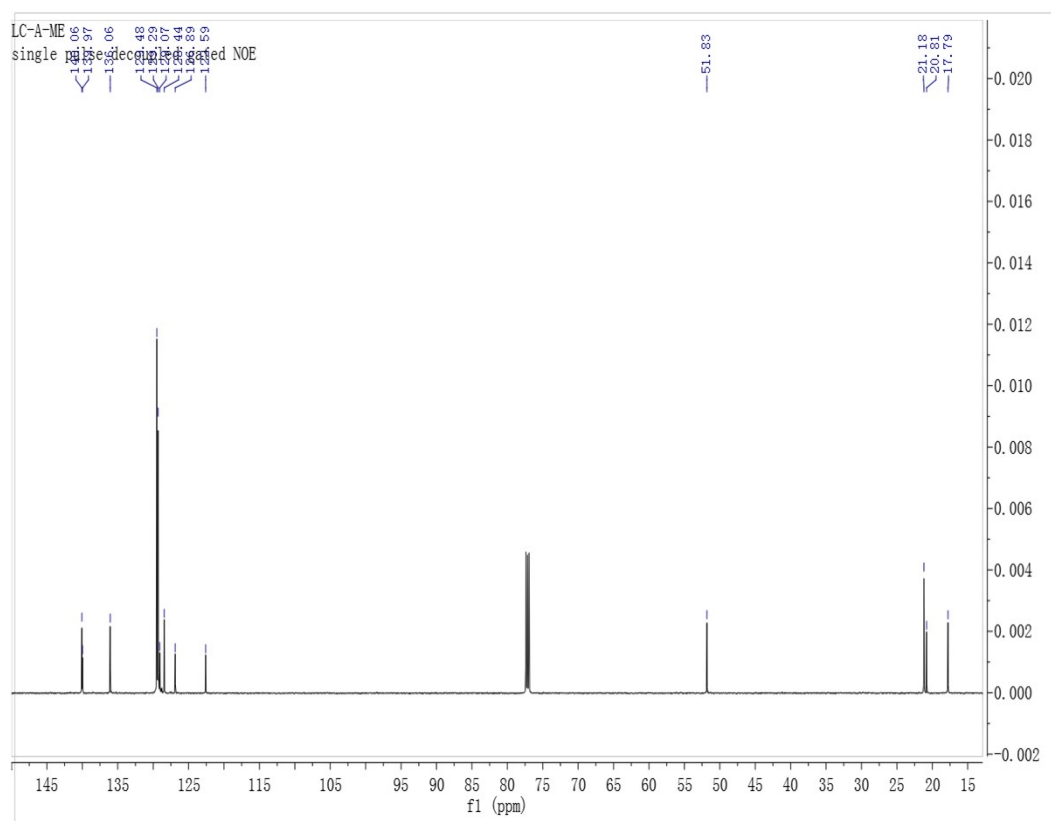

**Figure S5.**  $^{13}\text{C}$  NMR spectrum of A2 in  $\text{CDCl}_3$ .



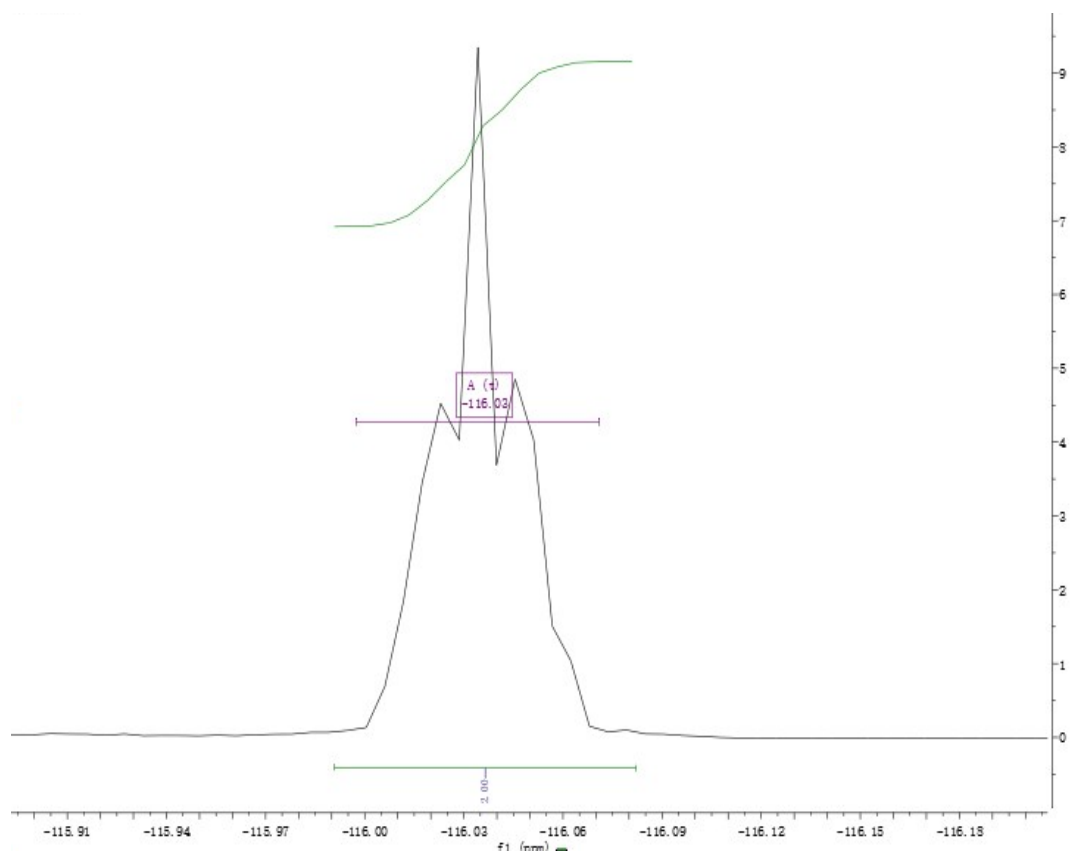

**Figure S8.**  $^{19}\text{F}$  NMR spectrum of A3 in  $\text{CDCl}_3$ .

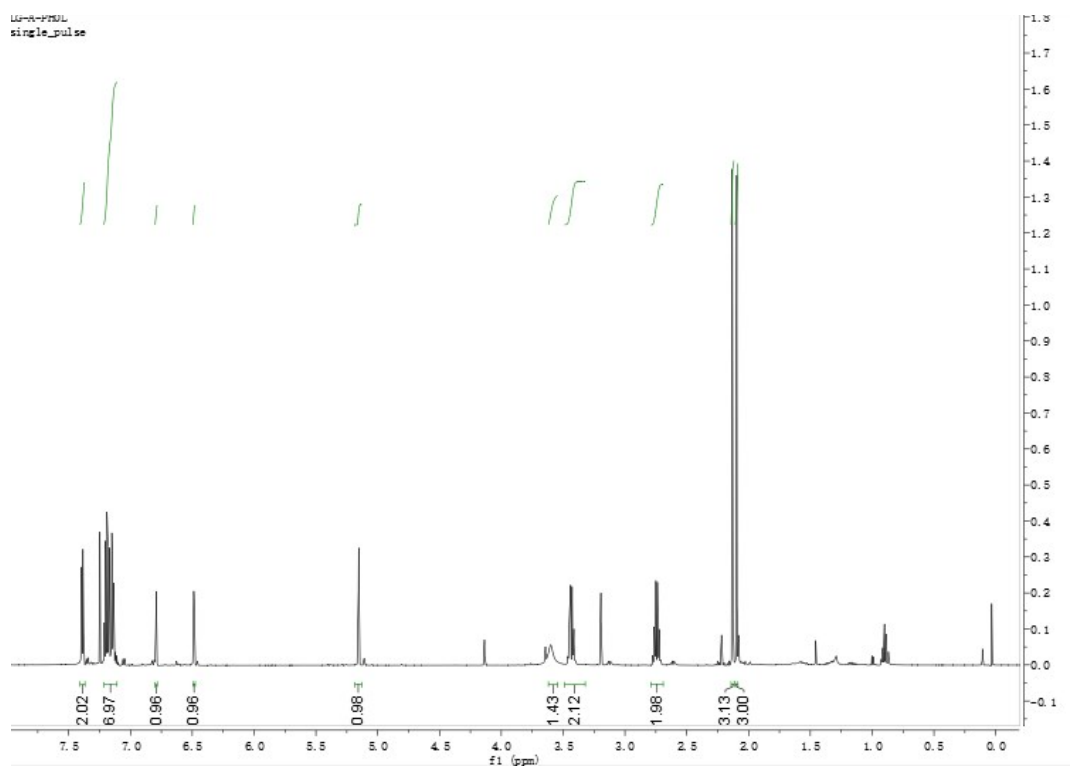

**Figure S9.**  $^1\text{H}$  NMR spectrum of A4 in  $\text{CDCl}_3$ .

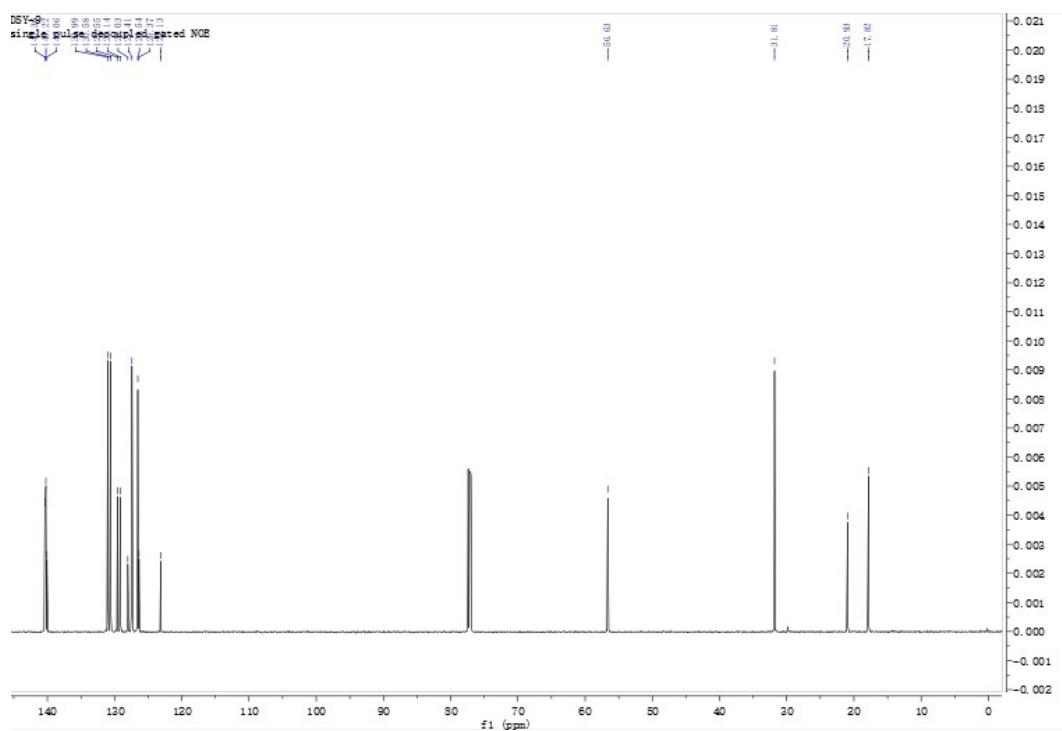

**Figure S10.**  $^{13}\text{C}$  NMR spectrum of **A4** in  $\text{CDCl}_3$ .

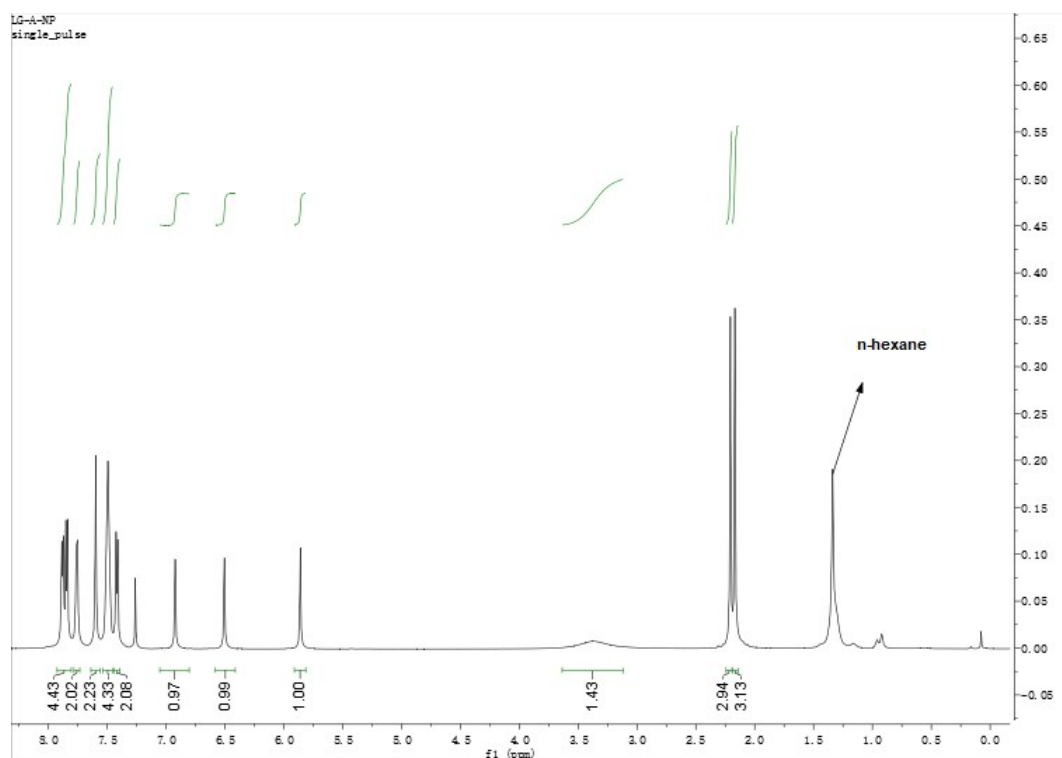

**Figure S11.**  $^1\text{H}$  NMR spectrum of **A5** in  $\text{CDCl}_3$ .

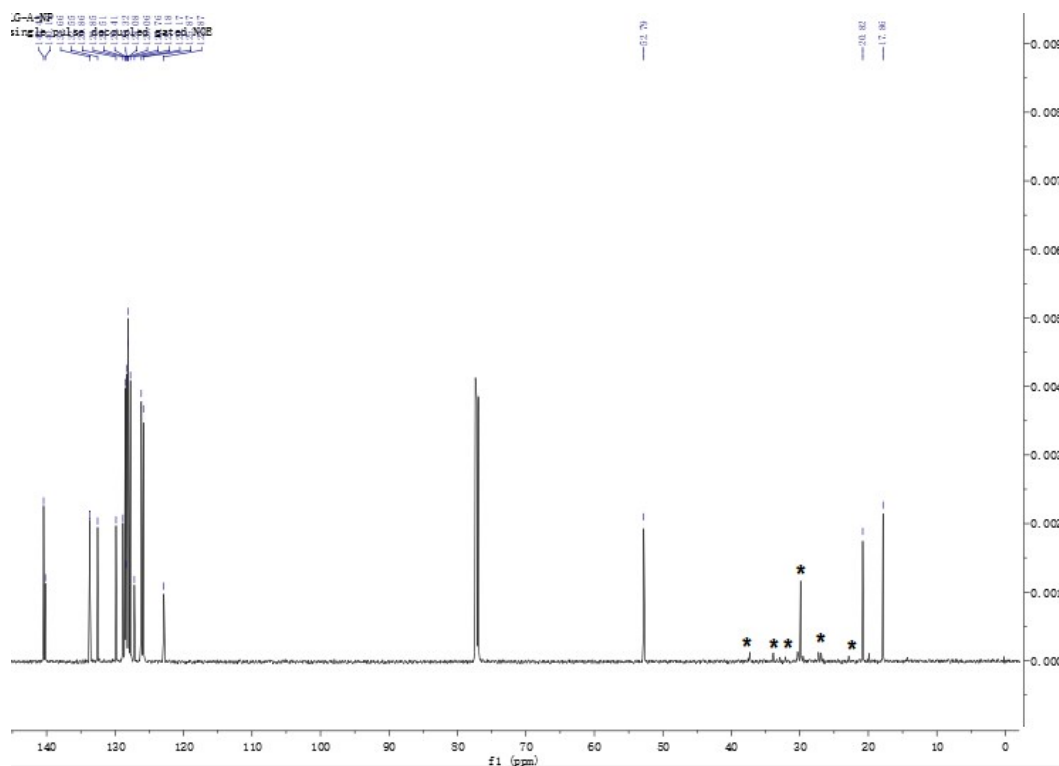

**Figure S12.**  $^{13}\text{C}$  NMR spectrum of A5 in  $\text{CDCl}_3$ \*Hexanes

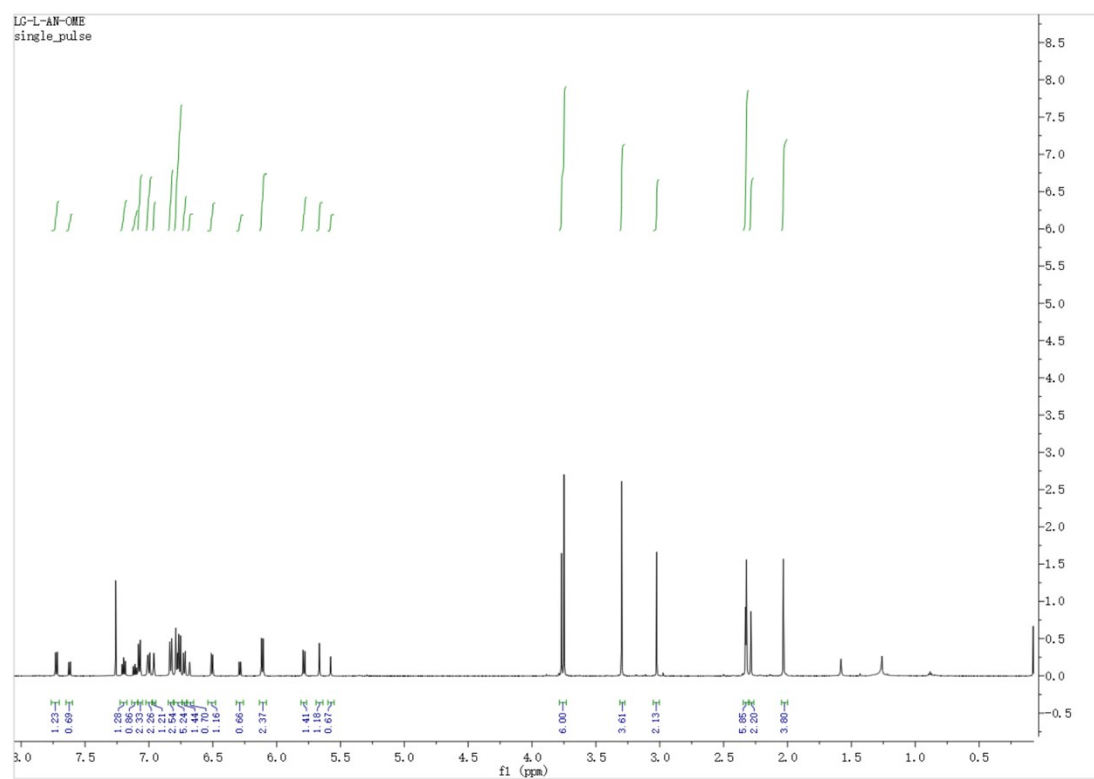

**Figure S13.**  $^1\text{H}$  NMR spectrum of L1 in  $\text{CDCl}_3$ .

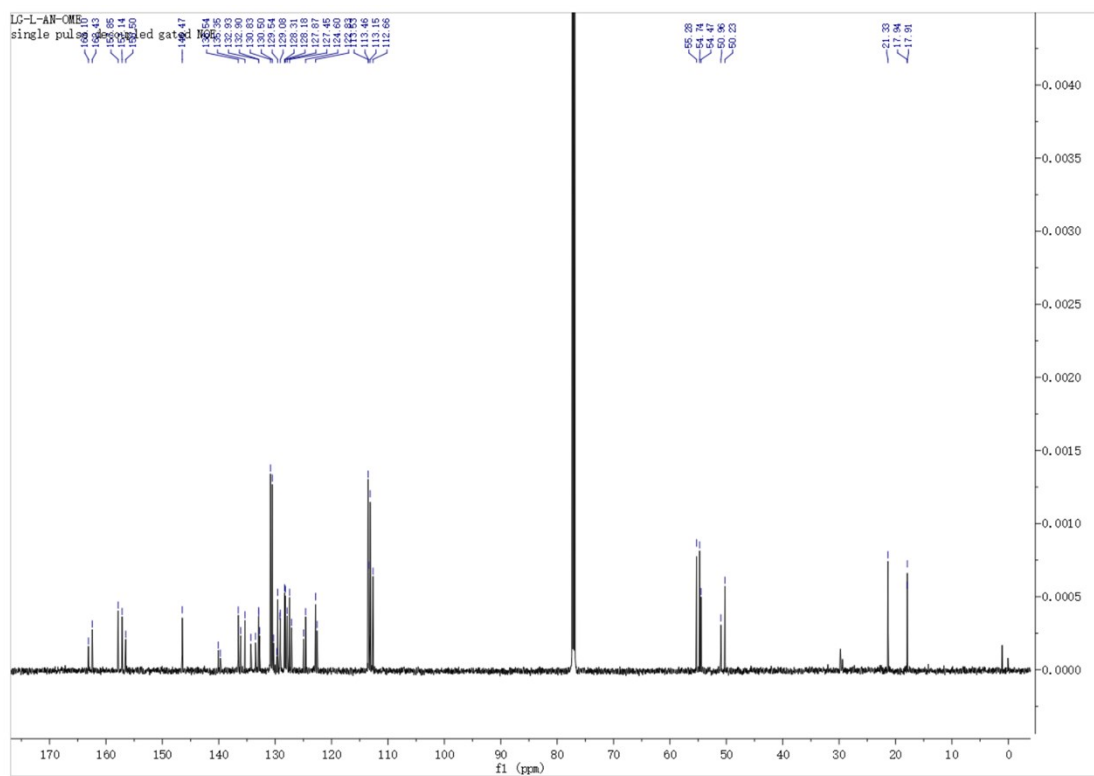

Figure S14.  $^{13}\text{C}$  NMR spectrum of **L1** in  $\text{CDCl}_3$ .

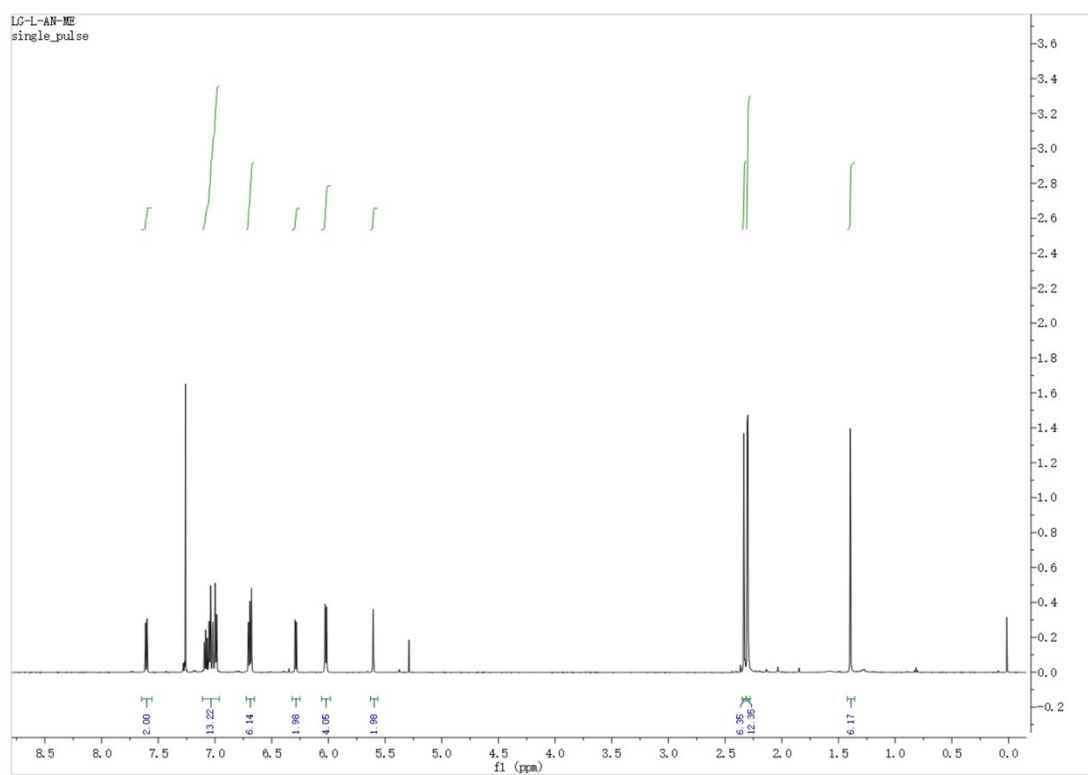

Figure S15.  $^1\text{H}$  NMR spectrum of **L2** in  $\text{CDCl}_3$ .



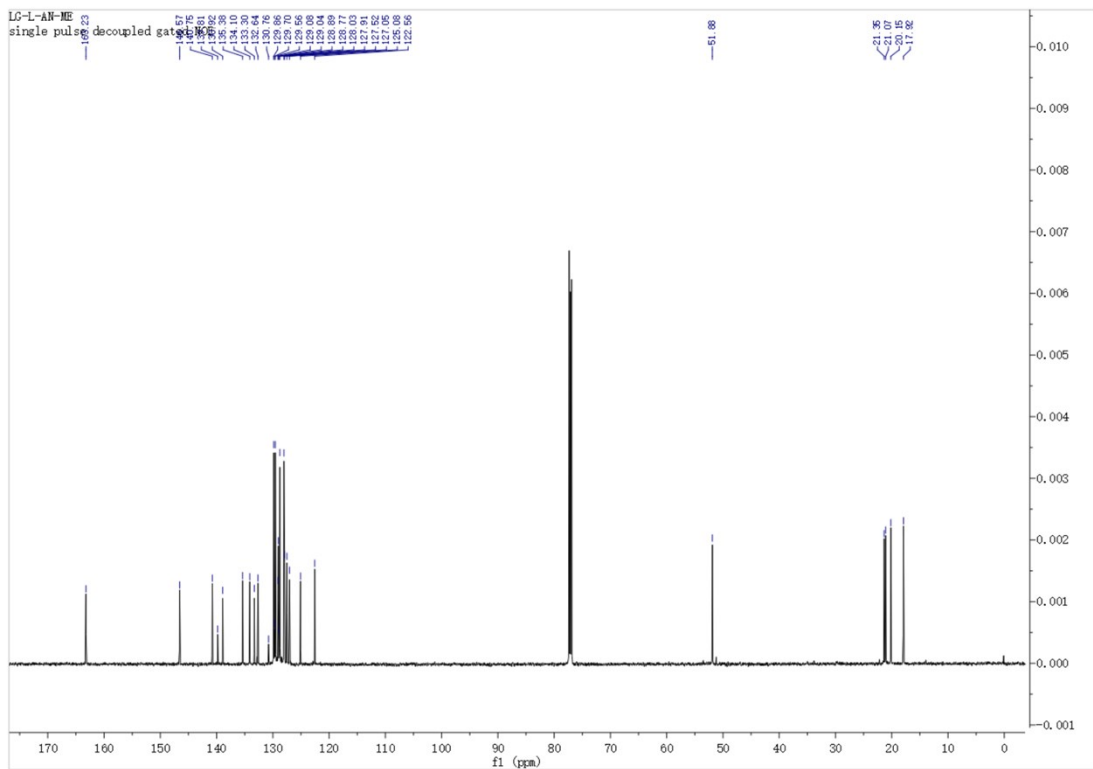

Figure S16. <sup>13</sup>C NMR spectrum of L2 in CDCl<sub>3</sub>.

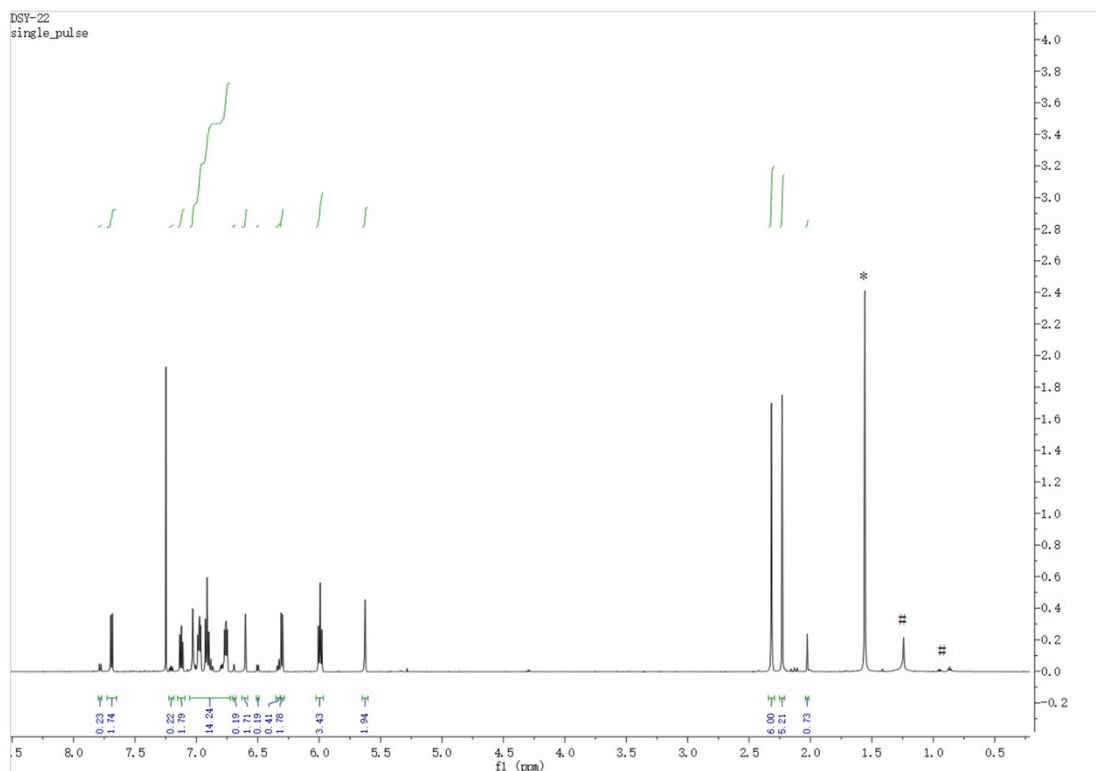

Figure S17. <sup>1</sup>H NMR spectrum of L3 in CDCl<sub>3</sub>. \*H<sub>2</sub>O, #Hexanes.

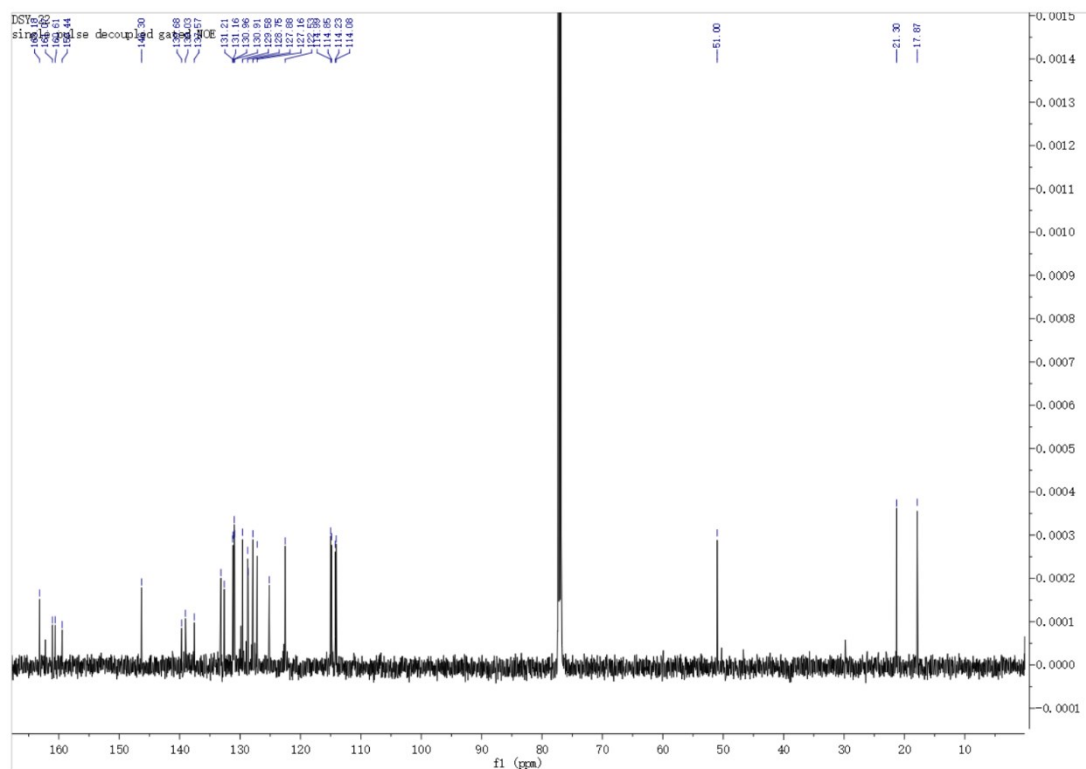

**Figure S18.**  $^{13}\text{C}$  NMR spectrum of **L3** in  $\text{CDCl}_3$ .

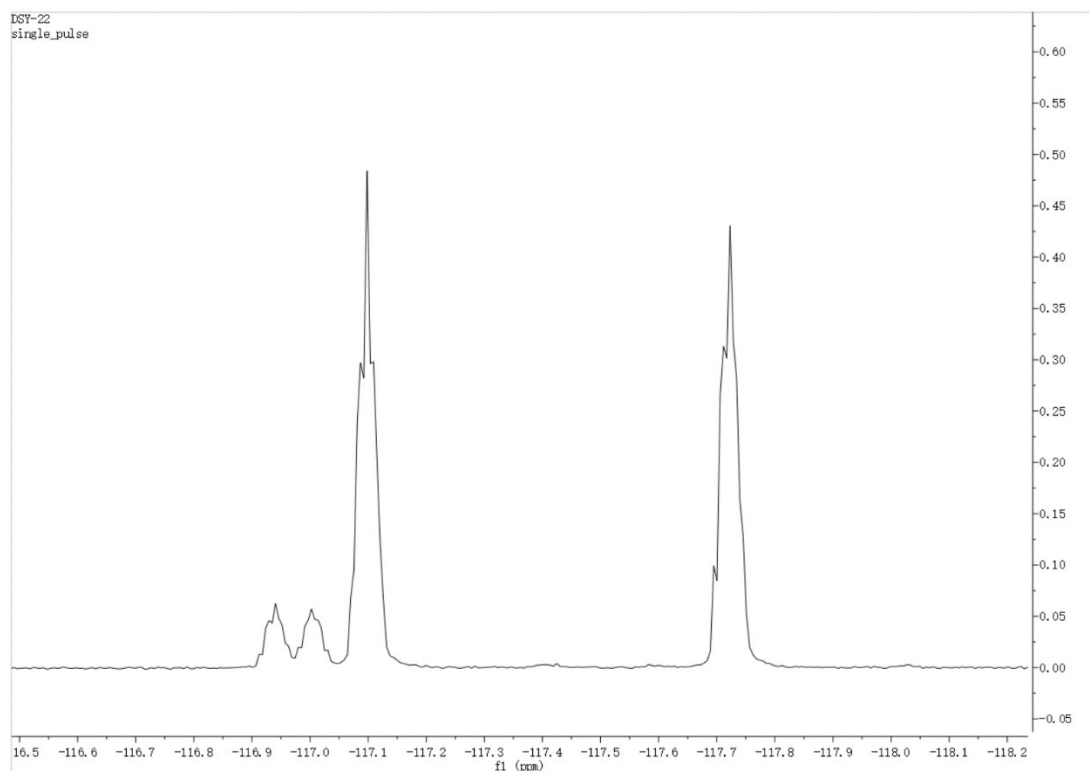

**Figure S19.**  $^{19}\text{F}$  NMR spectrum of **L3** in  $\text{CDCl}_3$ .

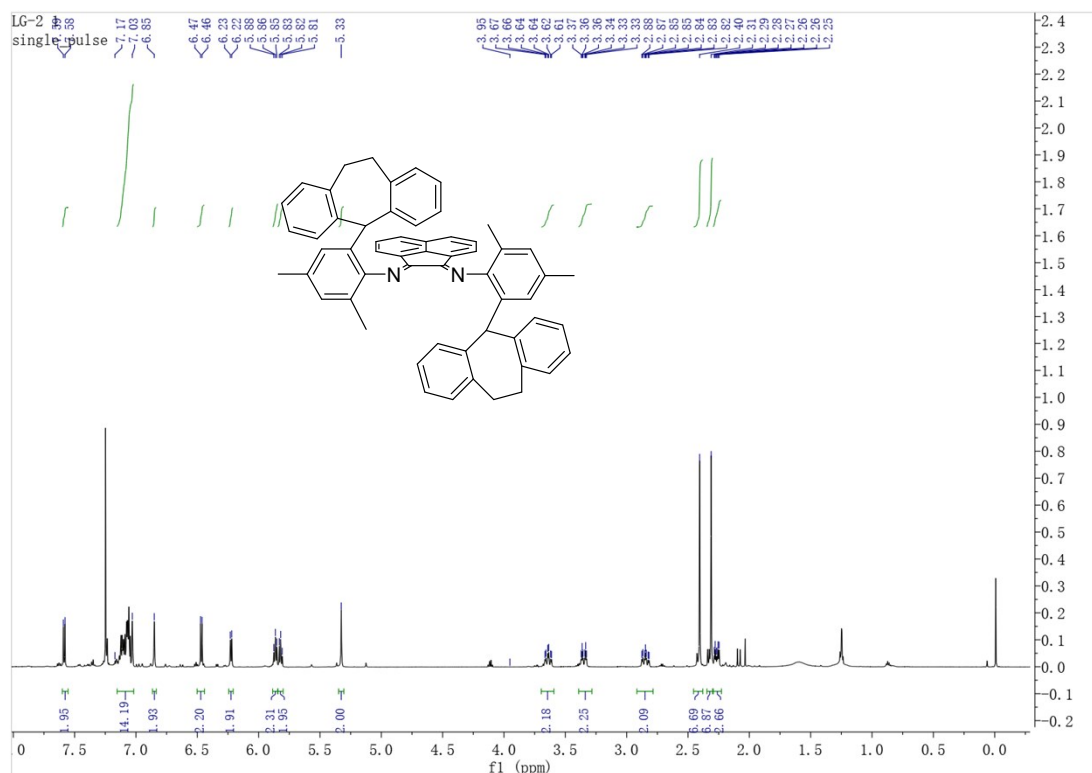

Figure S20.  $^1\text{H}$  NMR spectrum of L4 in  $\text{CDCl}_3$ .

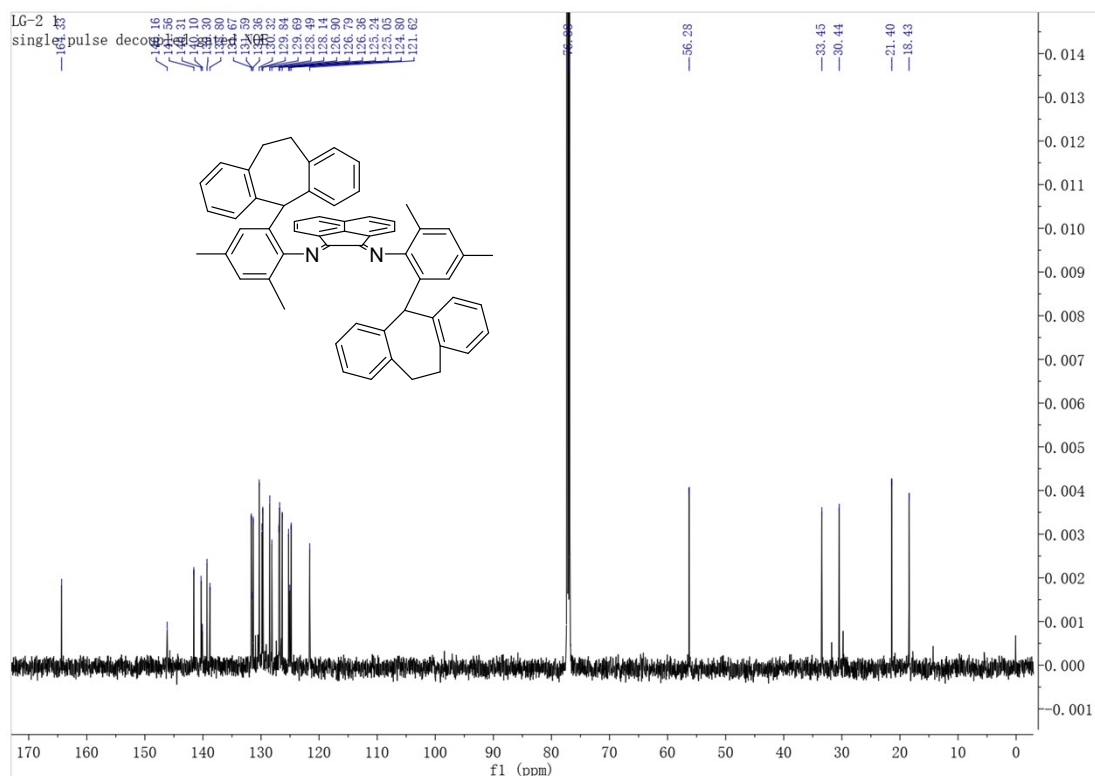

Figure S21.  $^{13}\text{C}$  NMR spectrum of L4 in  $\text{CDCl}_3$ .

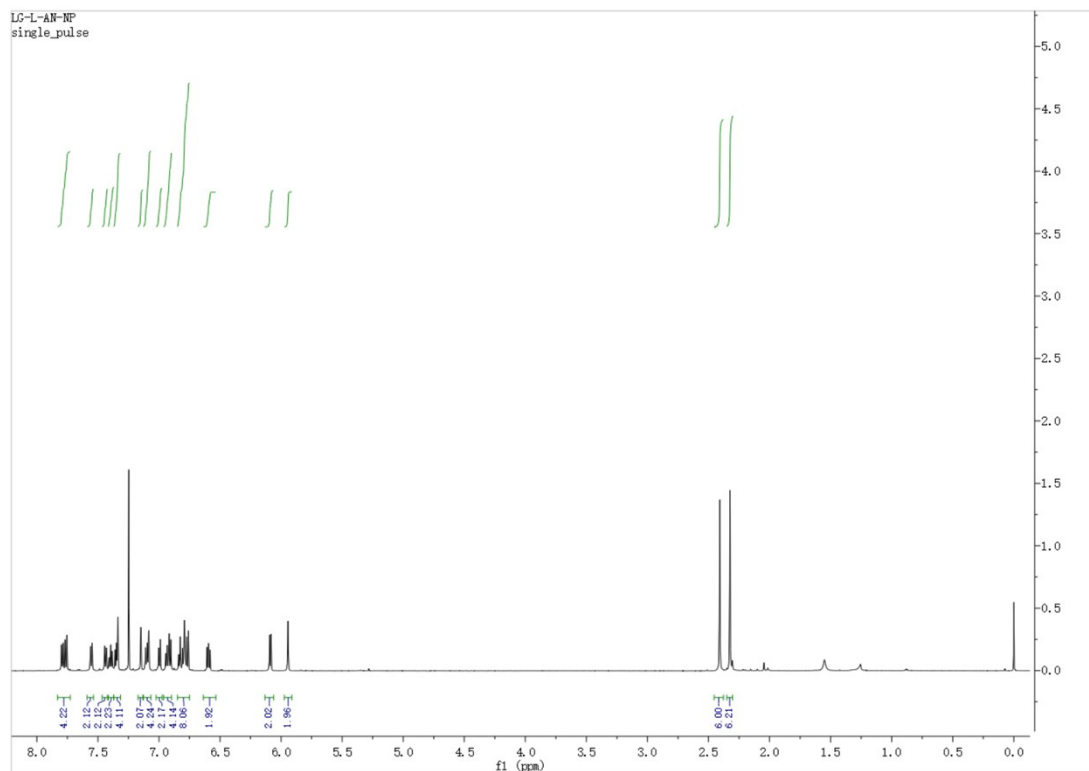

Figure S22.  $^1\text{H}$  NMR spectrum of **L5** in  $\text{CDCl}_3$ .

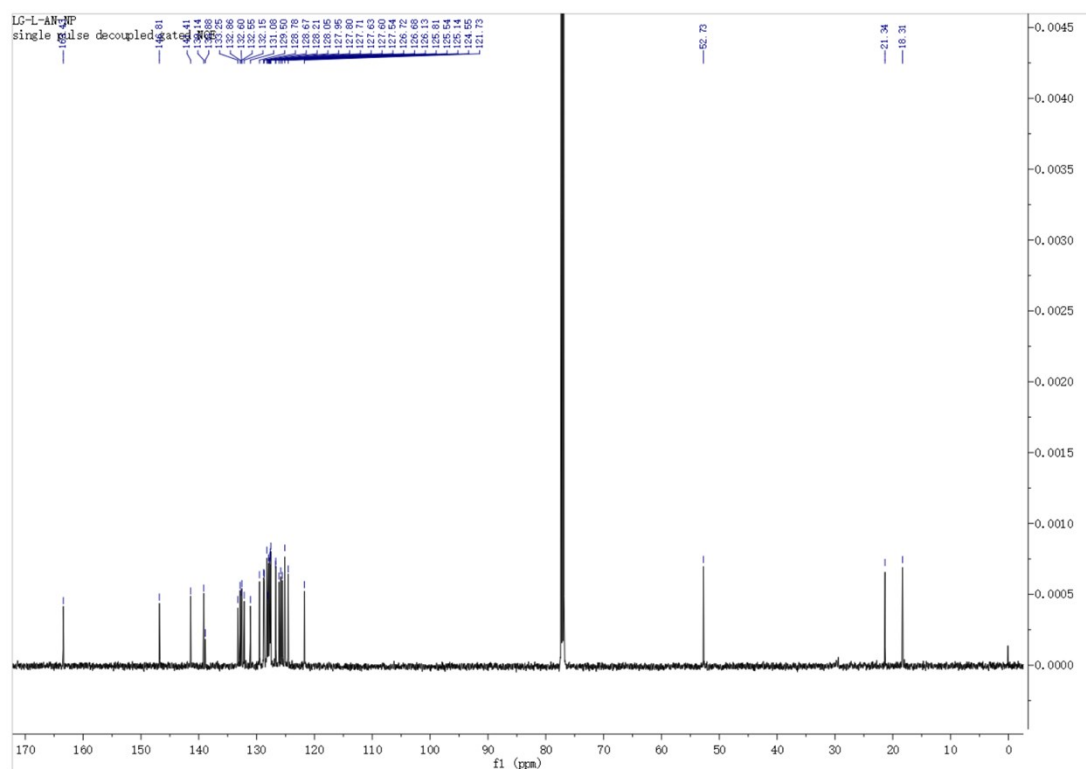

Figure S23.  $^{13}\text{C}$  NMR spectrum of **L5** in  $\text{CDCl}_3$ .

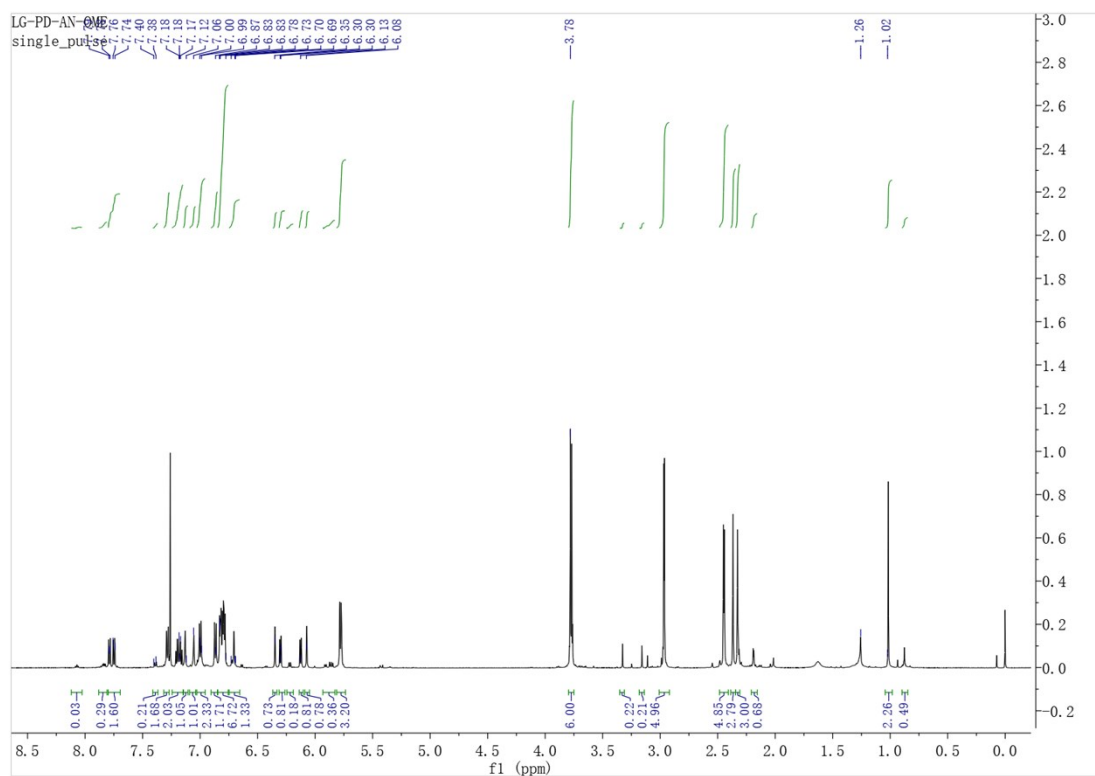

Figure S24.  $^1\text{H}$  NMR spectrum of Pd1 in  $\text{CDCl}_3$ .

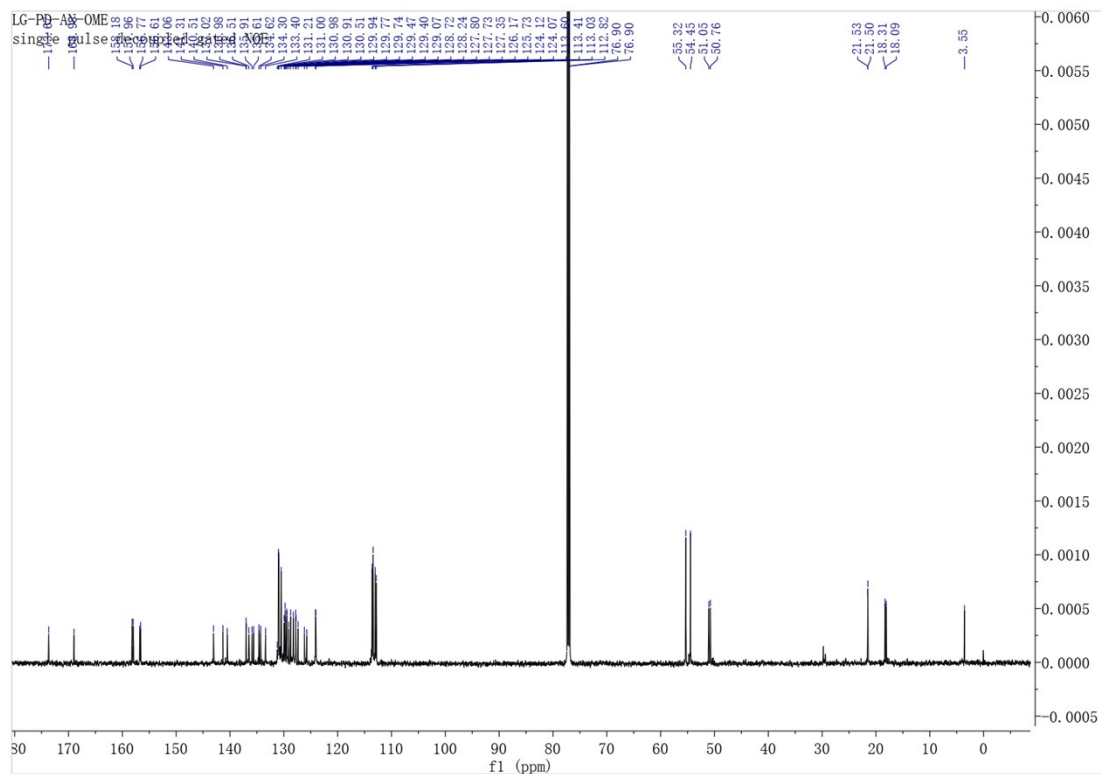

Figure S25.  $^{13}\text{C}$  NMR spectrum of Pd2 in  $\text{CDCl}_3$ .

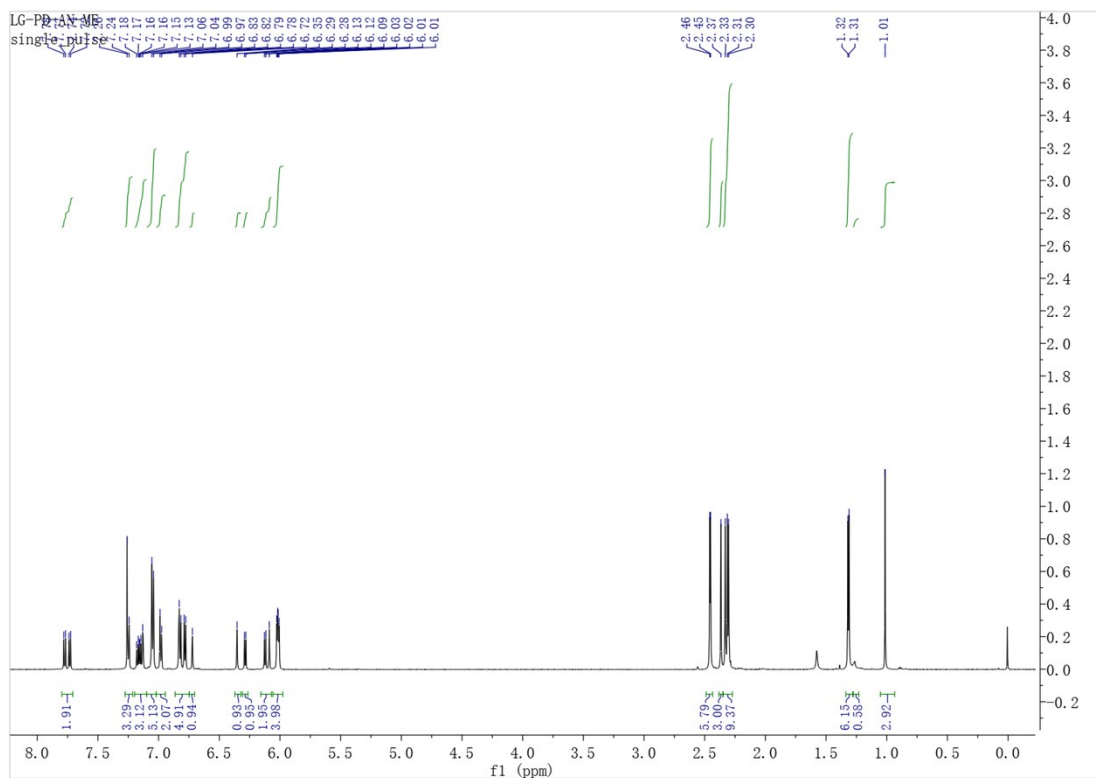

Figure S26.  $^1\text{H}$  NMR spectrum of Pd2 in  $\text{CDCl}_3$ .

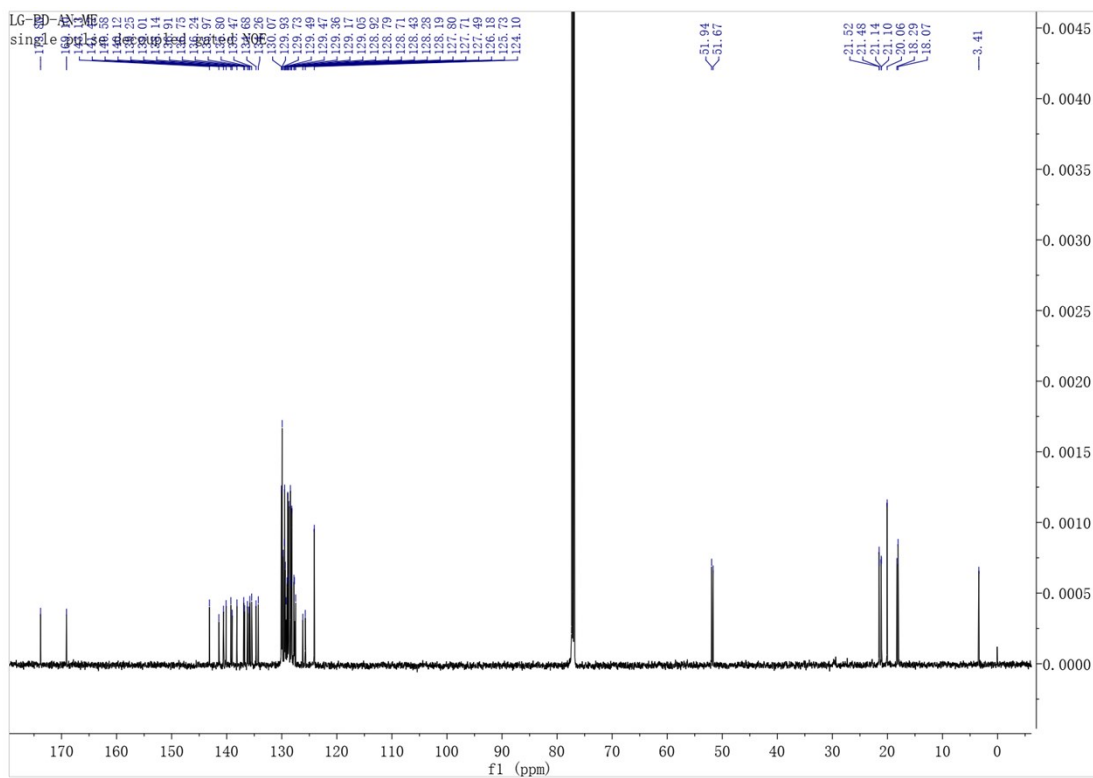

Figure S27.  $^{13}\text{C}$  NMR spectrum of Pd2 in  $\text{CDCl}_3$ .

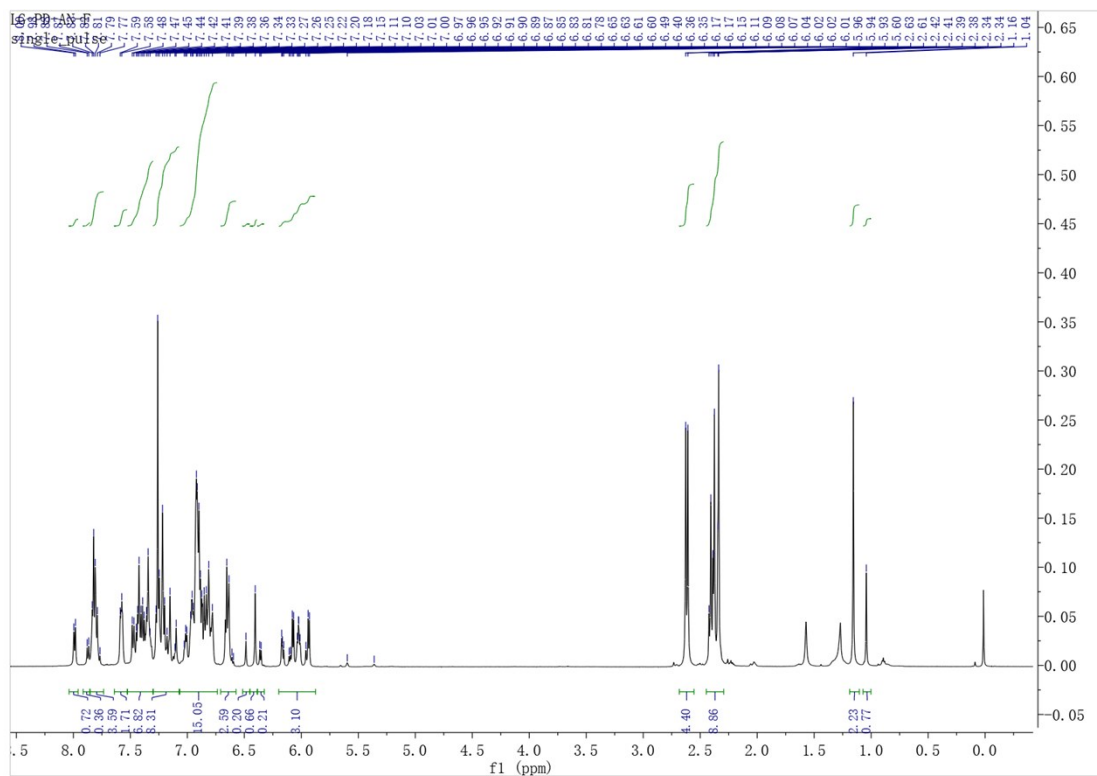

Figure S28.  $^1\text{H}$  NMR spectrum of Pd3 in  $\text{CDCl}_3$ .

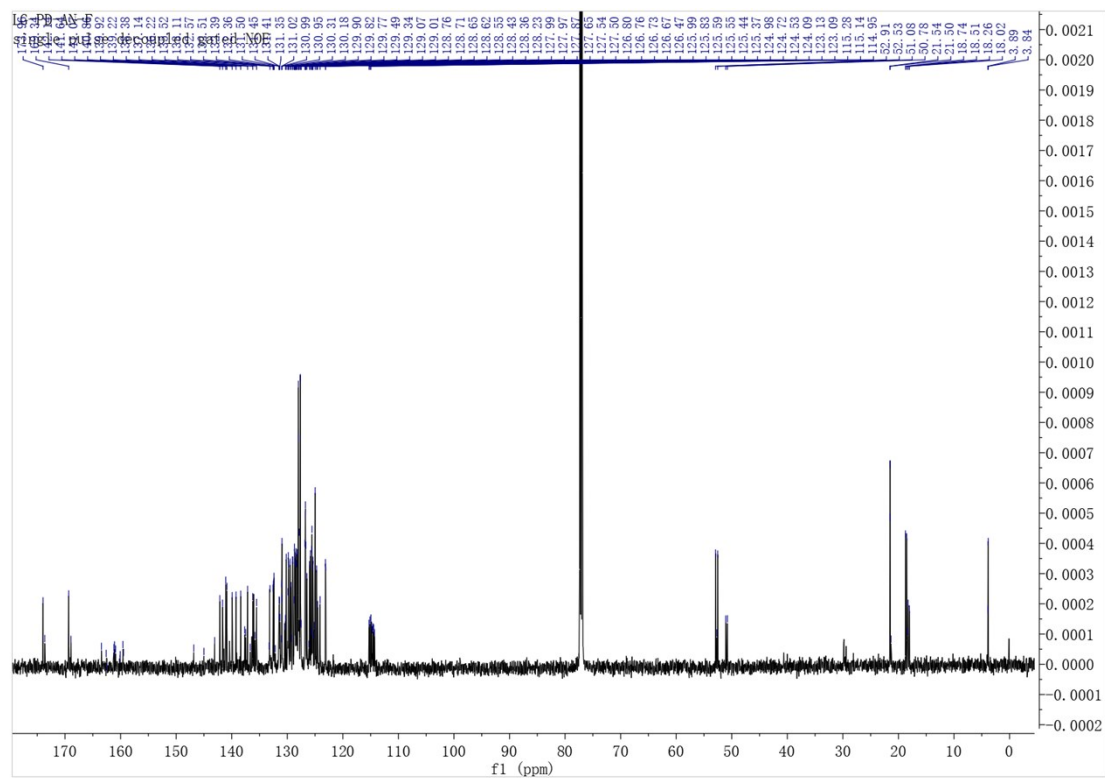

Figure S29.  $^{13}\text{C}$  NMR spectrum of Pd3 in  $\text{CDCl}_3$ .

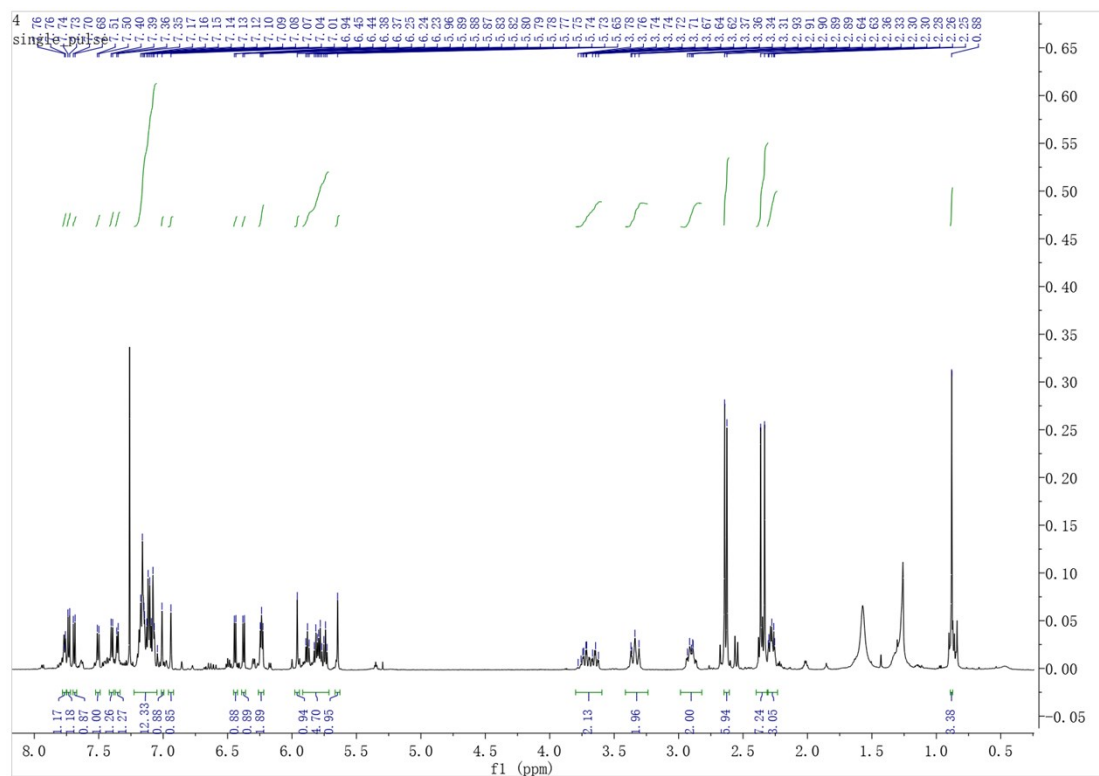

Figure S30.  $^1\text{H}$  NMR spectrum of Pd4 in  $\text{CDCl}_3$ .

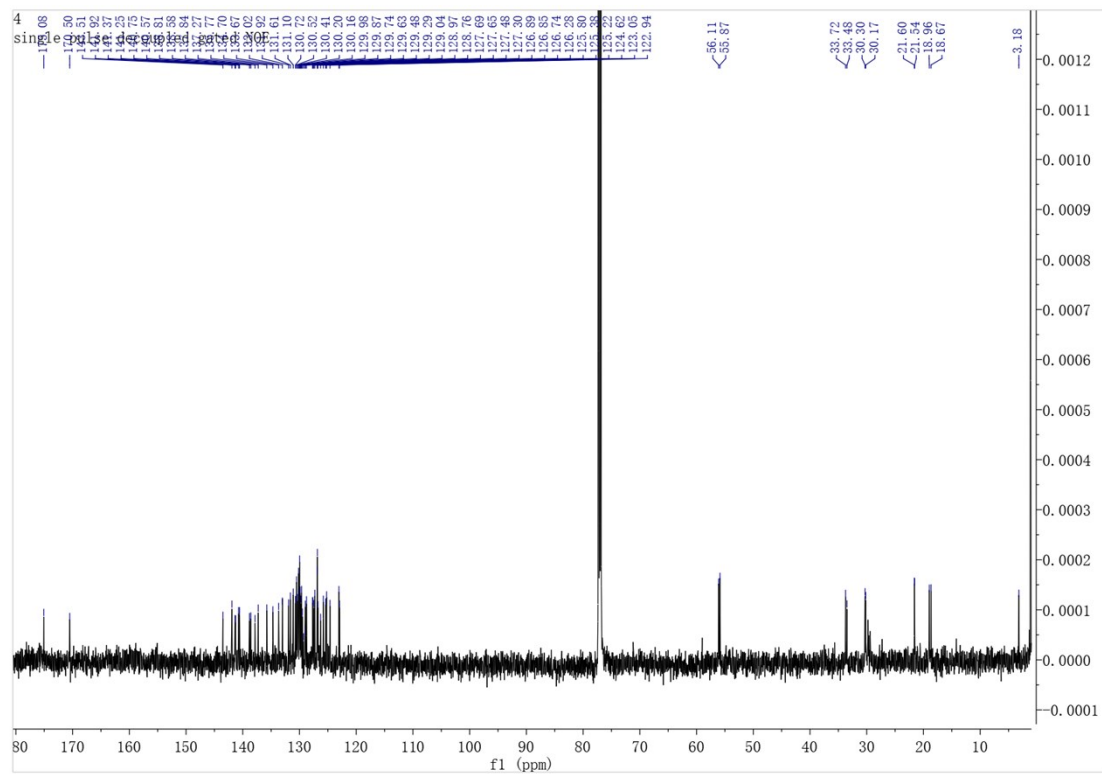

Figure S31.  $^{13}\text{C}$  NMR spectrum of Pd4 in  $\text{CDCl}_3$ .



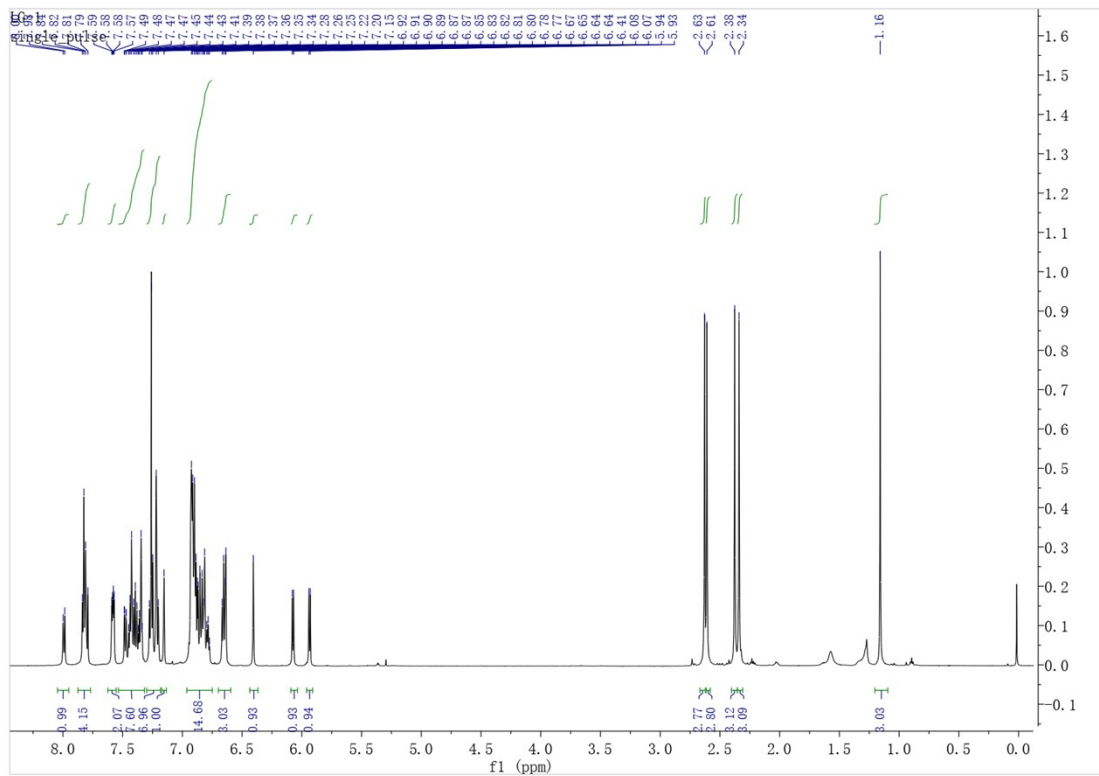

**Figure S32.**  $^1\text{H}$  NMR spectrum of Pd5 in  $\text{CDCl}_3$ .

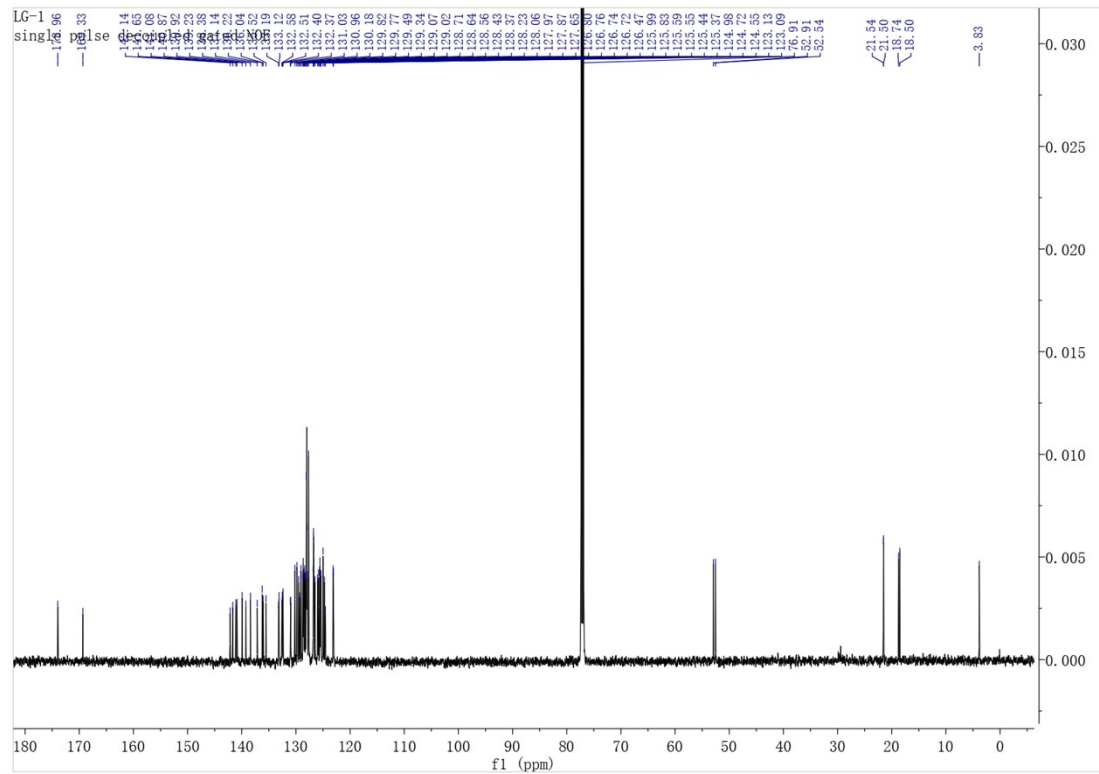

**Figure S33.**  $^{13}\text{C}$  NMR spectrum of Pd5 in  $\text{CDCl}_3$ .

### 3.2 ESI-MS and MALDI-TOF-MS Data

201909010-ESH+LG-A-OME #9 RT: 0.12 AV: 1 NL: 1.88E7  
T: FTMS + c ESI Full ms [100.00-1000.00]

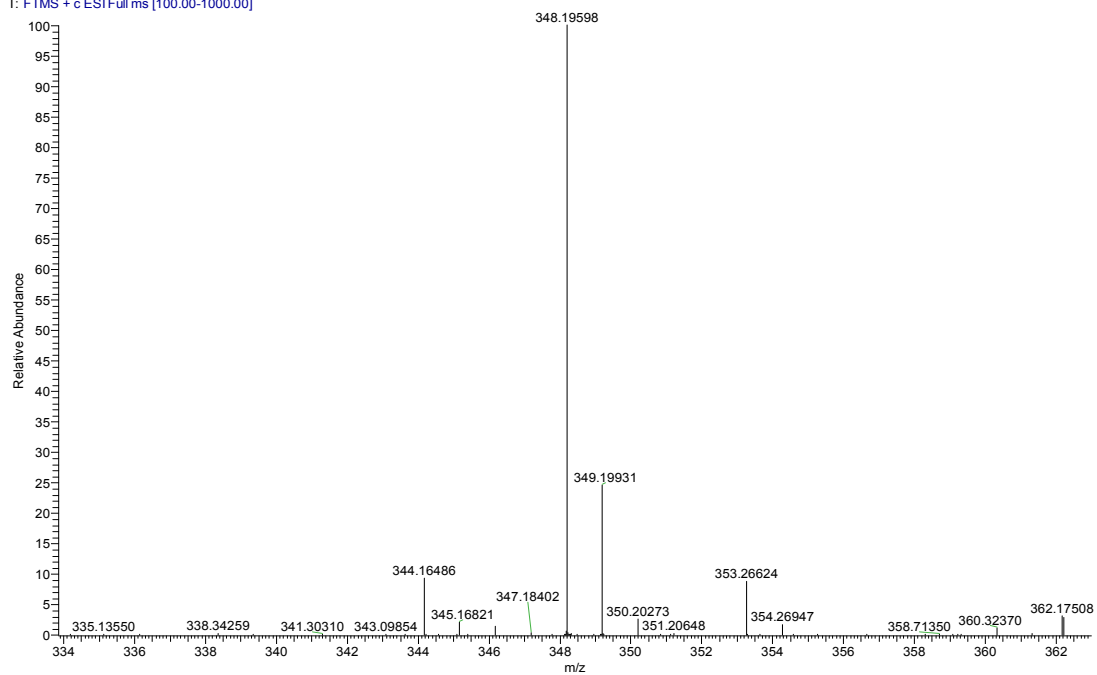

Figure S34. ESI-MS of A1.

201909010-ESH+LG-A-ME #10 RT: 0.13 AV: 1 NL: 6.79E7  
T: FTMS + c ESI Full ms [100.00-1000.00]

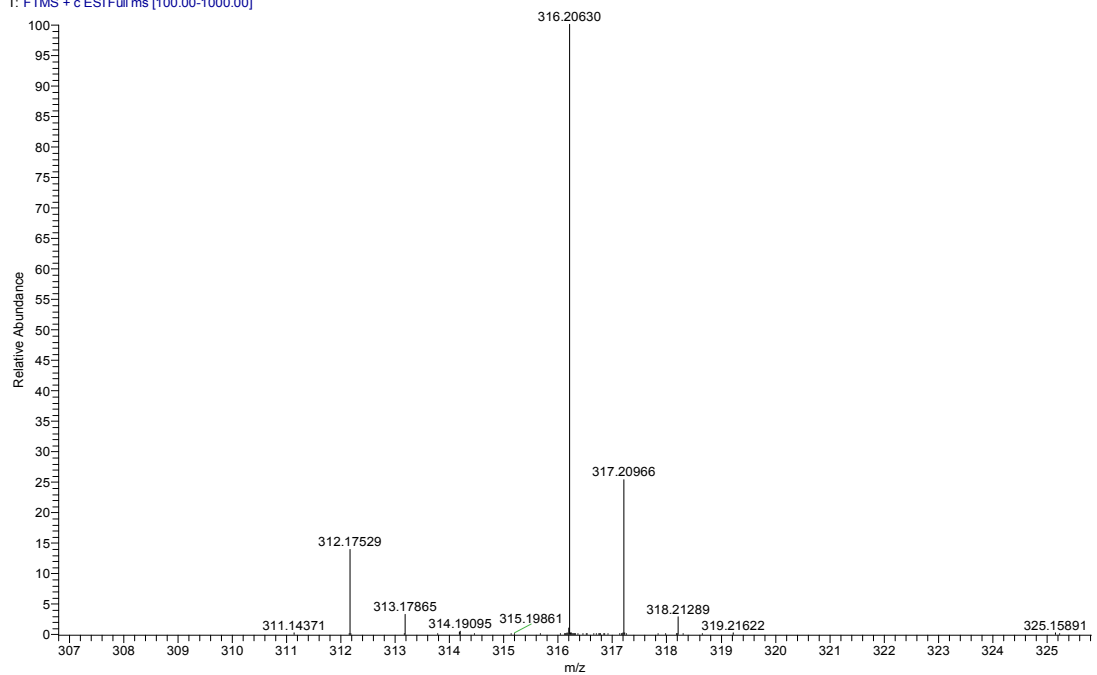

Figure S35. ESI-MS of A2.

201909010-ESH+LG-A-F #10 RT: 0.14 AV: 1 NL: 1.64E8  
T: FTMS + c ESI Full ms [200.00-1300.00]

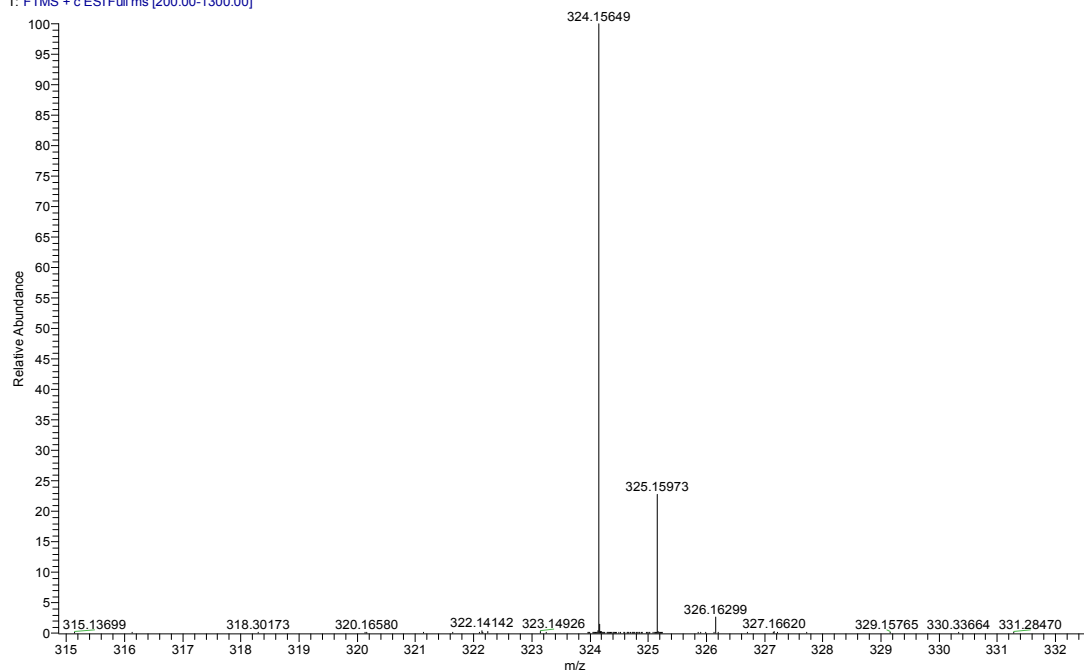

Figure S36. ESI-MS of A3.

20191105ESI-AMXE-PHOL #111 RT: 2.97 AV: 1 NL: 9.99E6  
T: FTMS + c ESI Full ms [50.00-1000.00]

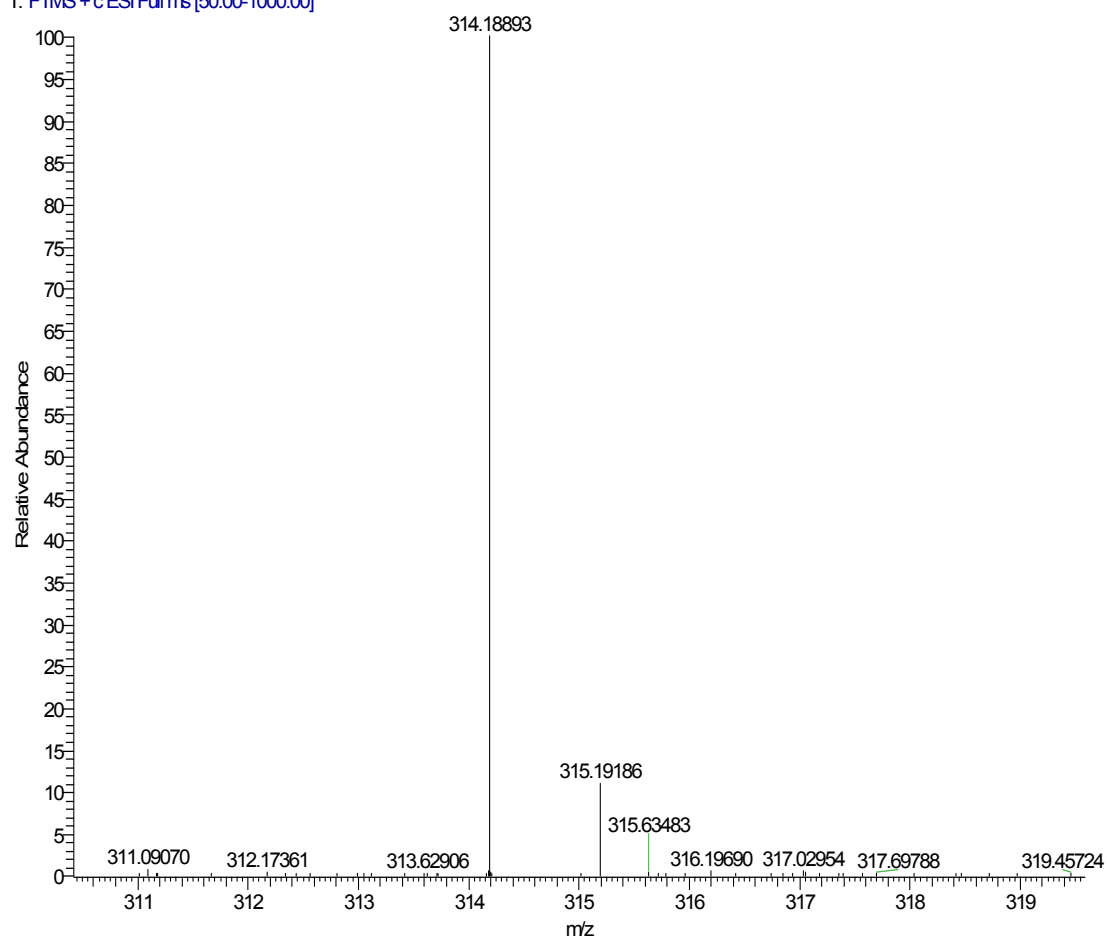

Figure S37. ESI-MS of A4.

201909010-ESH-LG-A-NP #180 RT: 2.66 AV: 1 NL: 5.25E6  
T: FTMS + c ESI Full ms [100.00-1000.00]

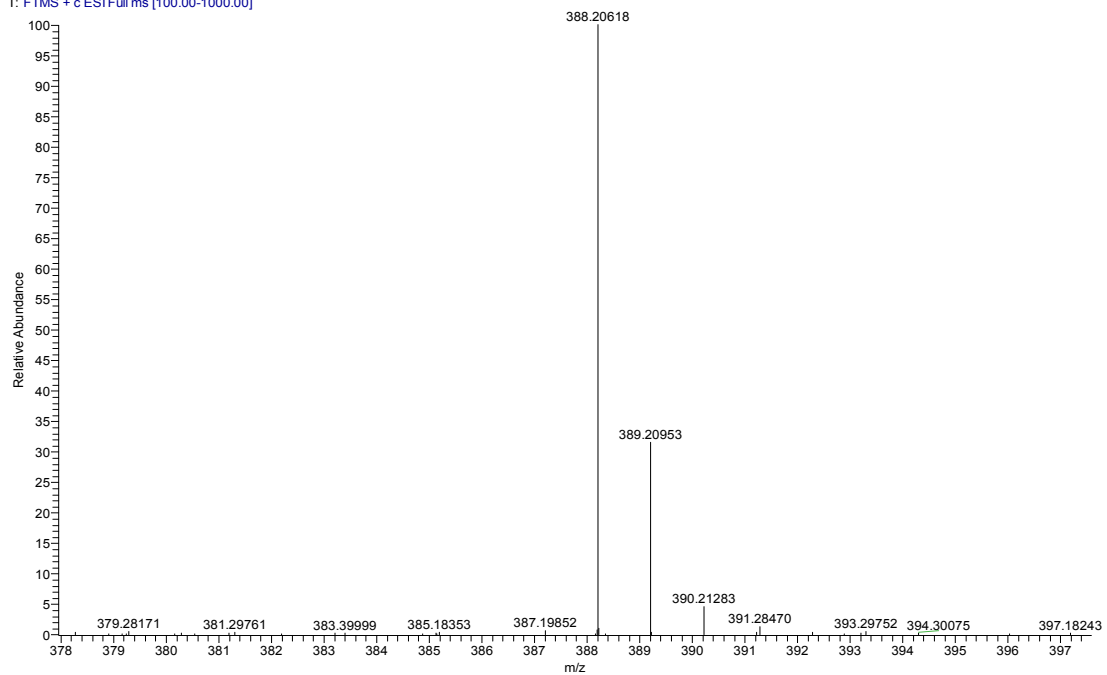

**Figure S38.** ESI-MS of A5.

201909018-ESH-LG-L-An-OMe #27 RT: 0.38 AV: 1 NL: 1.08E5  
T: FTMS + c ESI Full ms [50.00-1000.00]

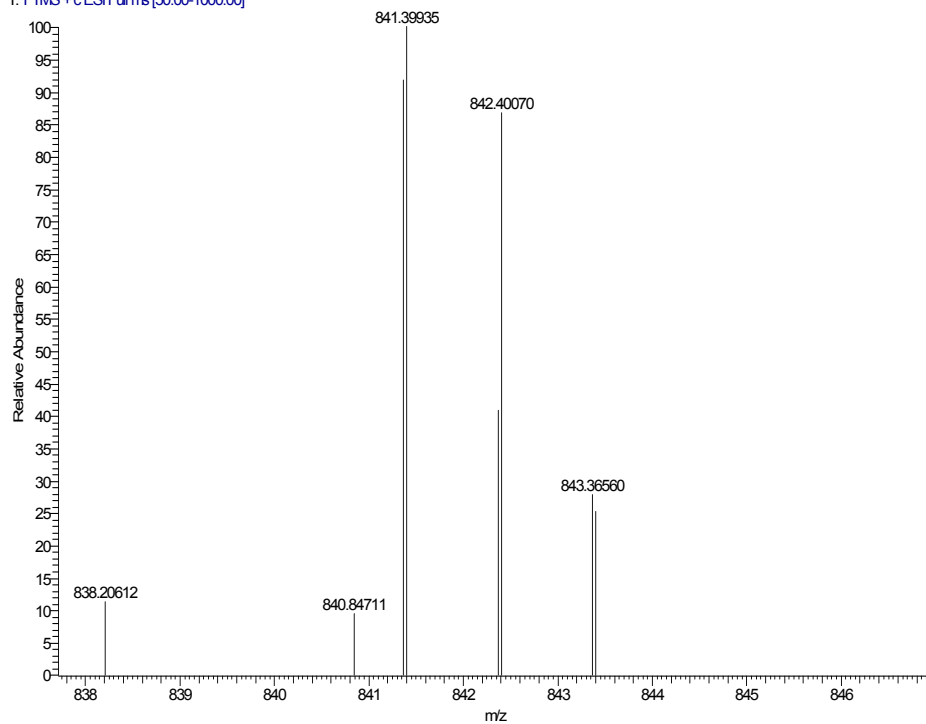

**Figure S39.** ESI-MS of L1.

201909018-ESH-LGL-An-Me #34-39 RT: 0.48-0.55 AV: 6 NL: 1.06E5  
T: FTMS + c.ESI Full ms [50.00-1000.00]

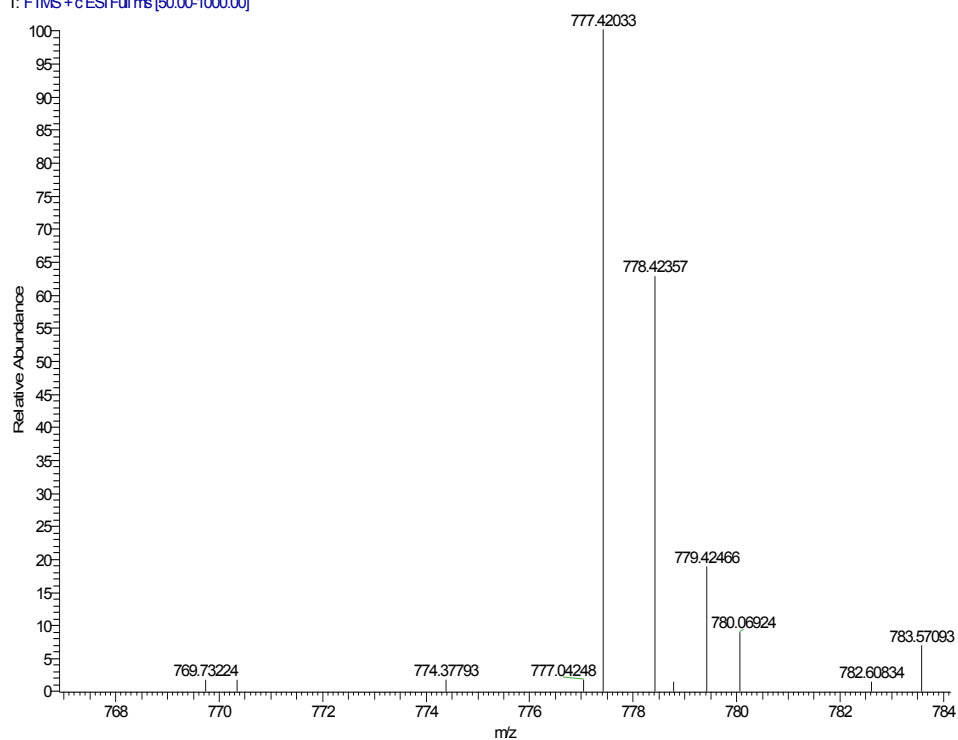

**Figure S40.** ESI-MS of L2.

201909018-ESH-LGL-An-F #20 RT: 0.28 AV: 1 NL: 8.59E4  
T: FTMS + c.ESI Full ms [50.00-1000.00]

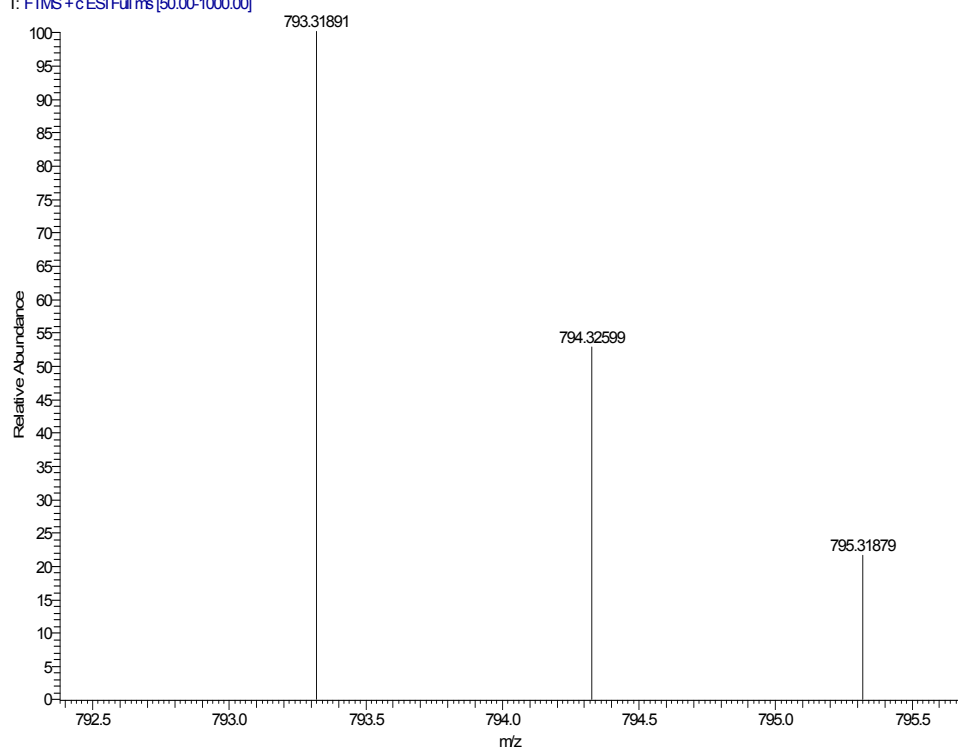

**Figure S41.** ESI-MS of L3.

20191105ESHL-AN-PHOL #12 RT: 0.29 AV: 1 SB: 1 0.04 NL: 1.33E5  
T: FTMS + c ESI Full ms [50.00-1000.00]

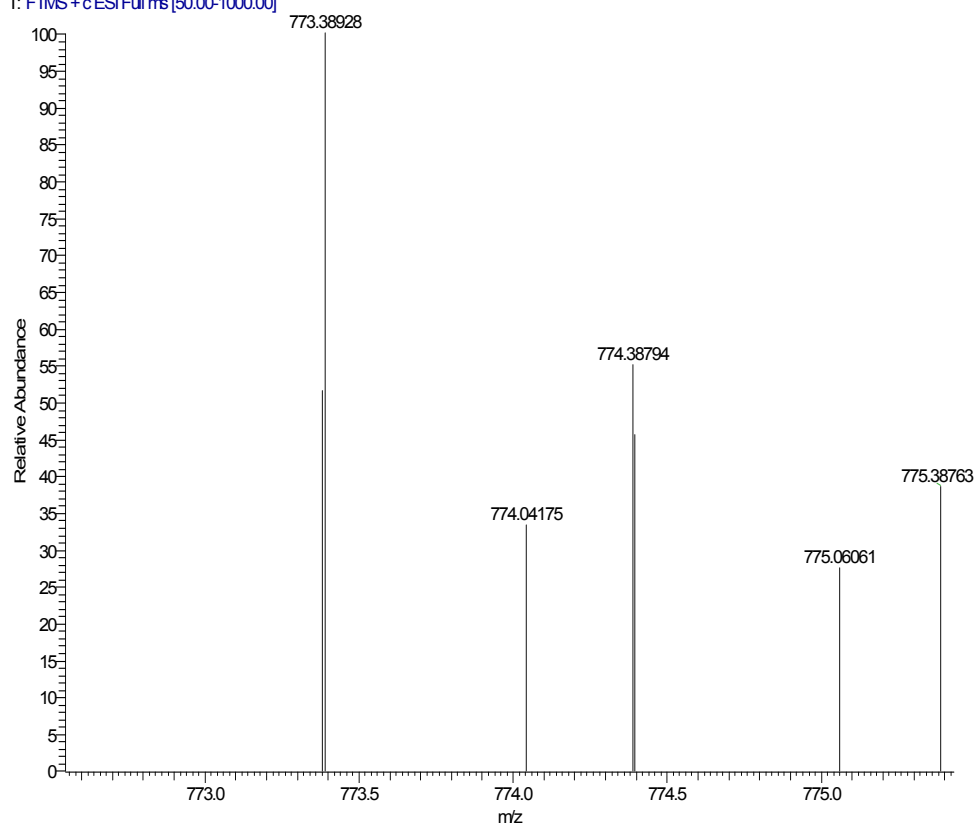

Figure S42. ESI-MS of L4.

20191105ESHL-AN-NP #5 RT: 0.10 AV: 1 SB: 1 0.04 NL: 1.50E5  
T: FTMS + c ESI Full ms [50.00-1000.00]

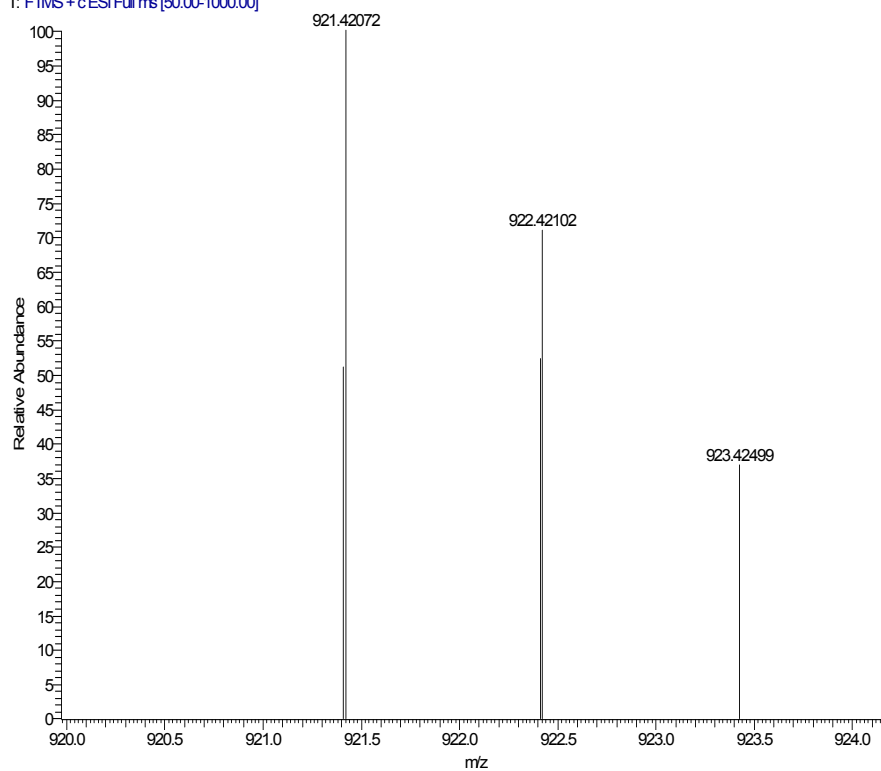

Figure S43. ESI-MS of L5.

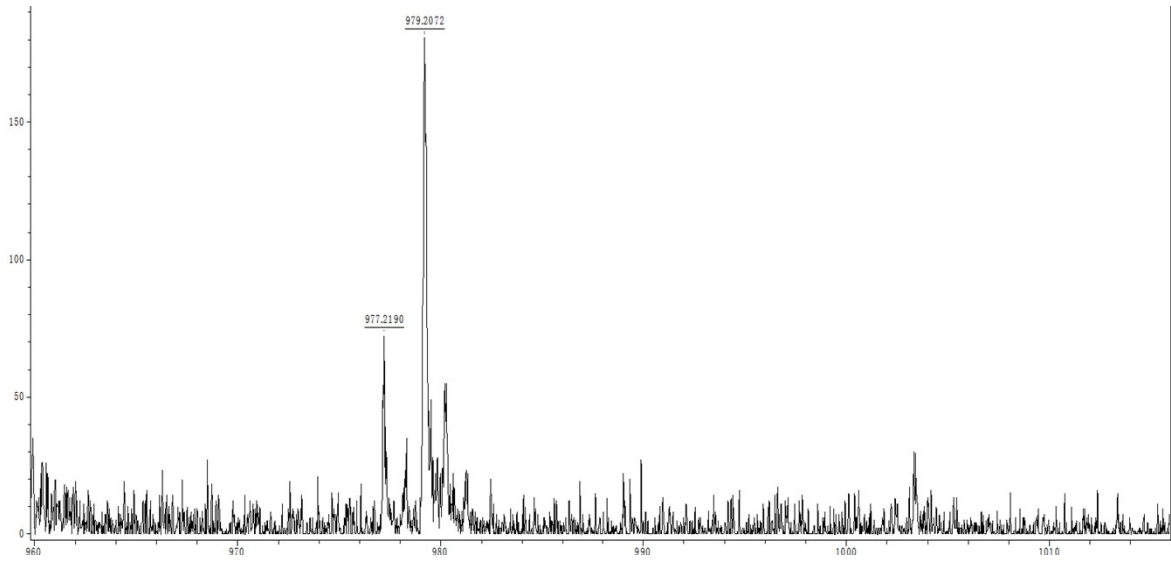

**Figure S44.** MALDI-TOF-MS of Ni1.

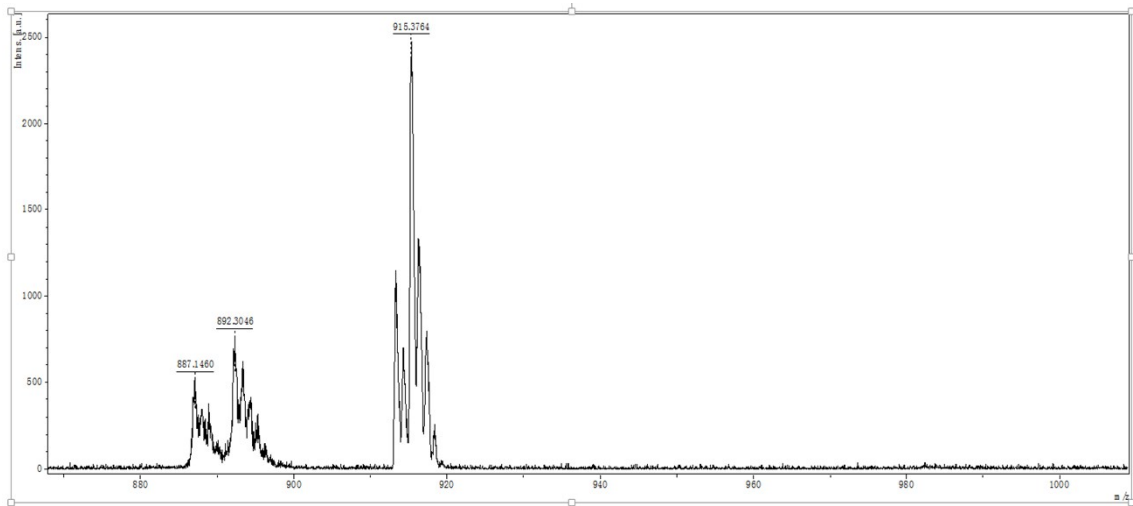

**Figure S45.** MALDI-TOF-MS of Ni2.

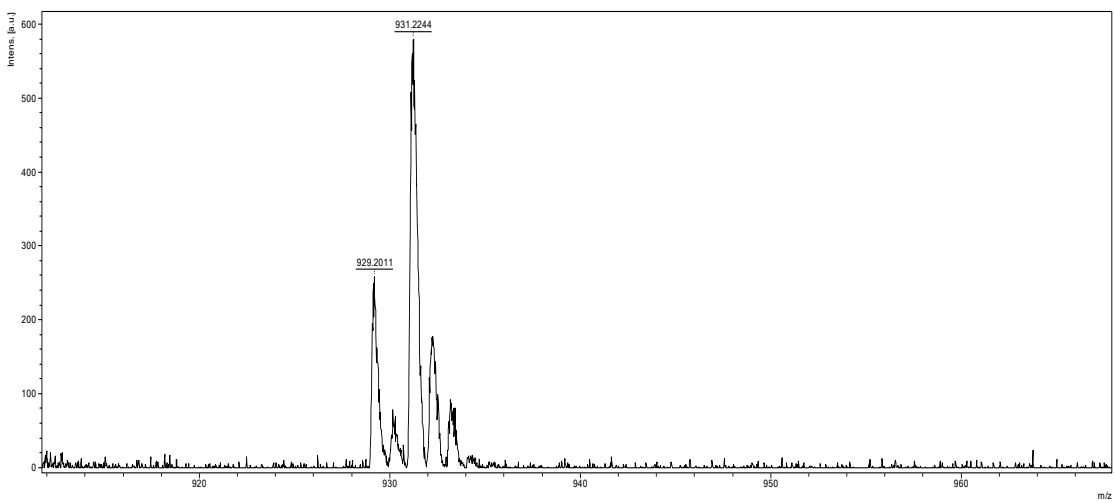

**Figure S46.** MALDI-TOF-MS of Ni3.

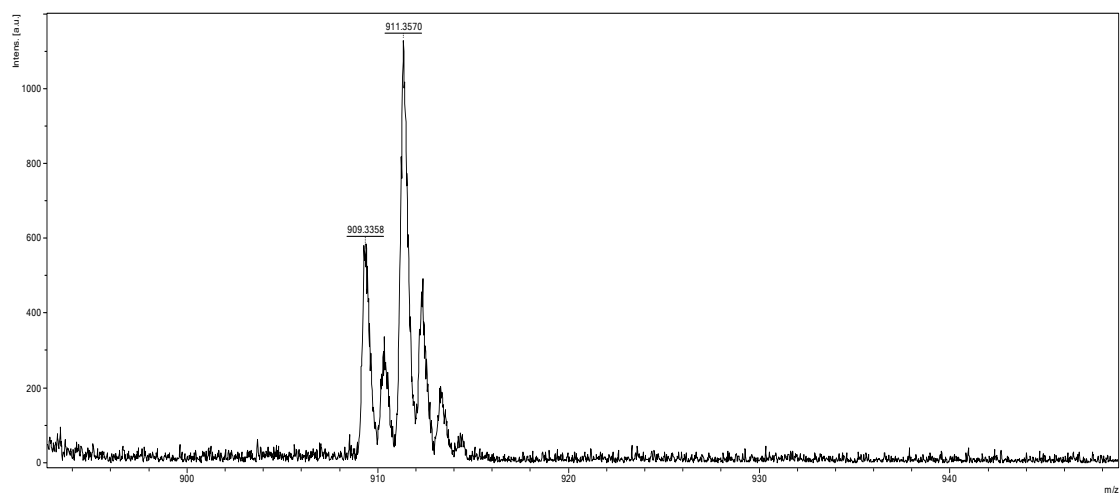

**Figure S47.** MALDI-TOF-MS of Ni4.

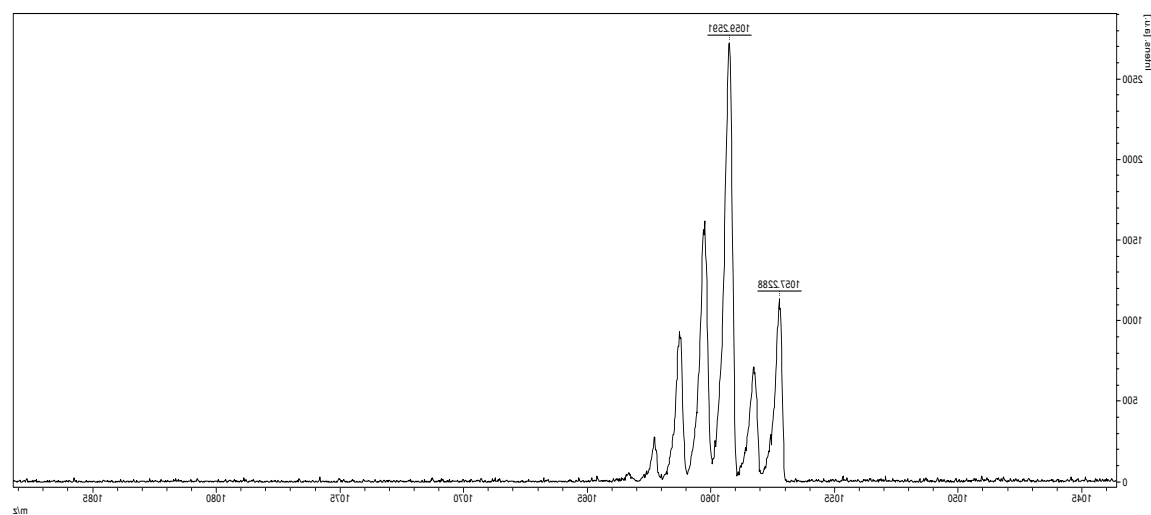

**Figure S48.** MALDI-TOF-MS of Ni5.

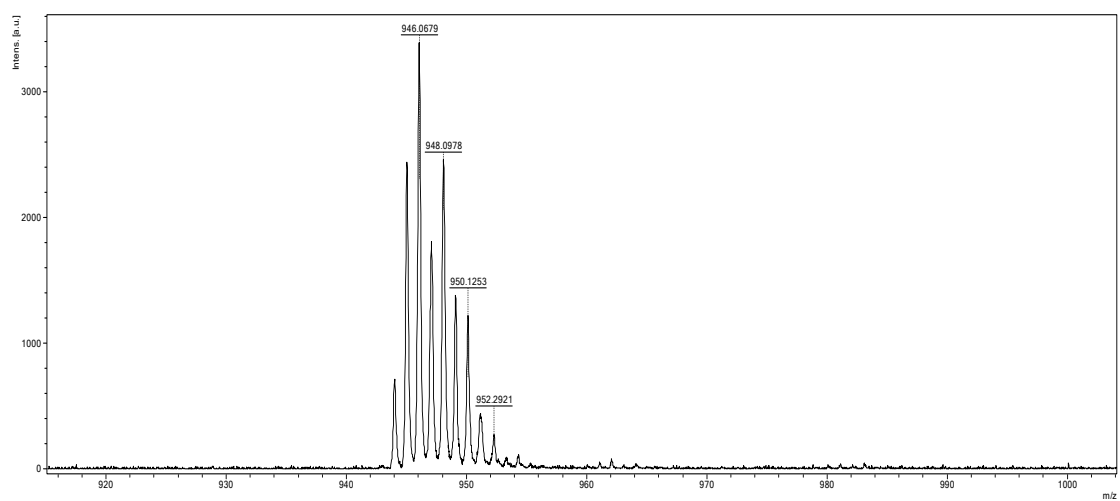

**Figure S49.** MALDI-TOF-MS of Pd1.



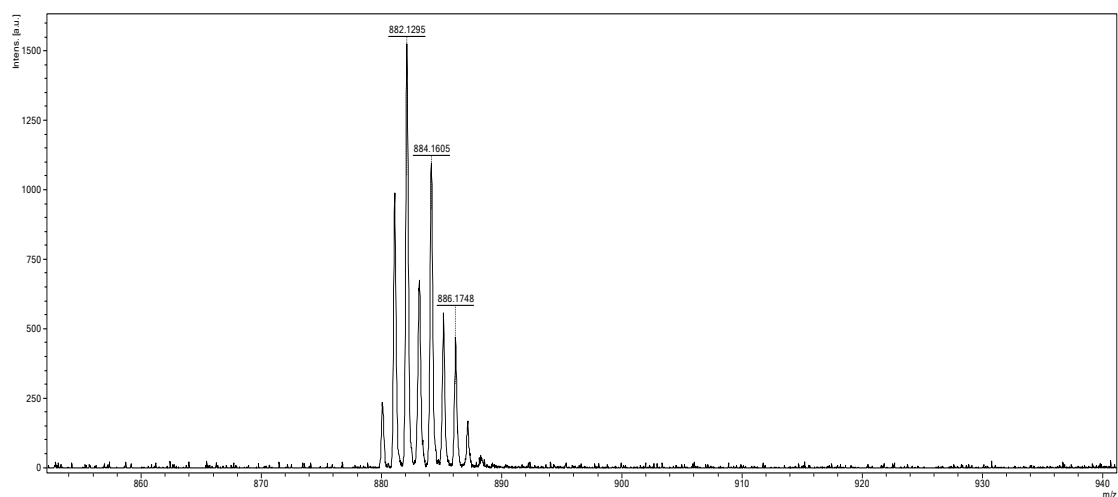

**Figure S50.** MALDI-TOF-MS of Pd2.

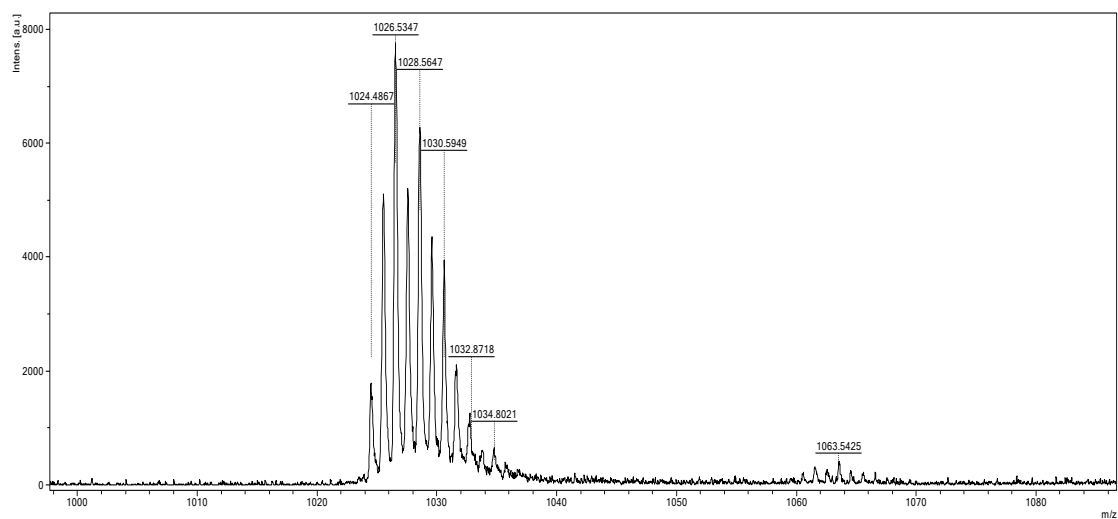

**Figure S51.** MALDI-TOF-MS of Pd3.

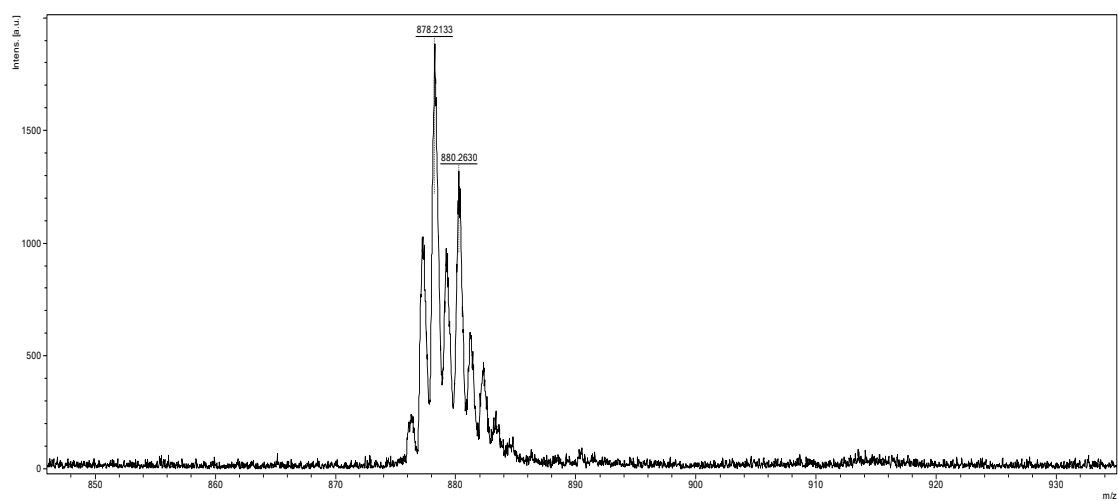

**Figure S52.** MALDI-TOF-MS of Pd4.

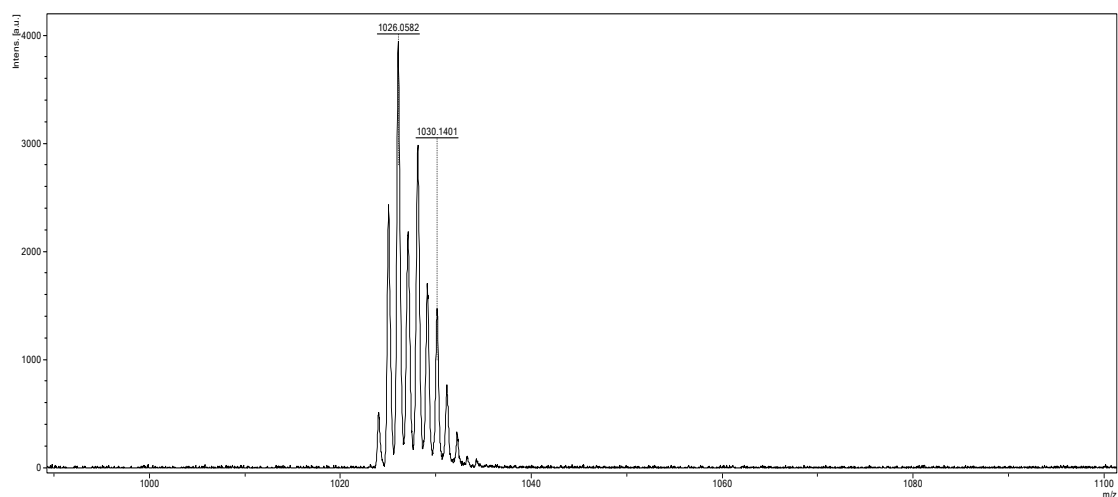

**Figure S53.** MALDI-TOF-MS of Pd5.

### 3.3 $^1\text{H}$ and $^{13}\text{C}$ NMR of Polymers and Copolymers.

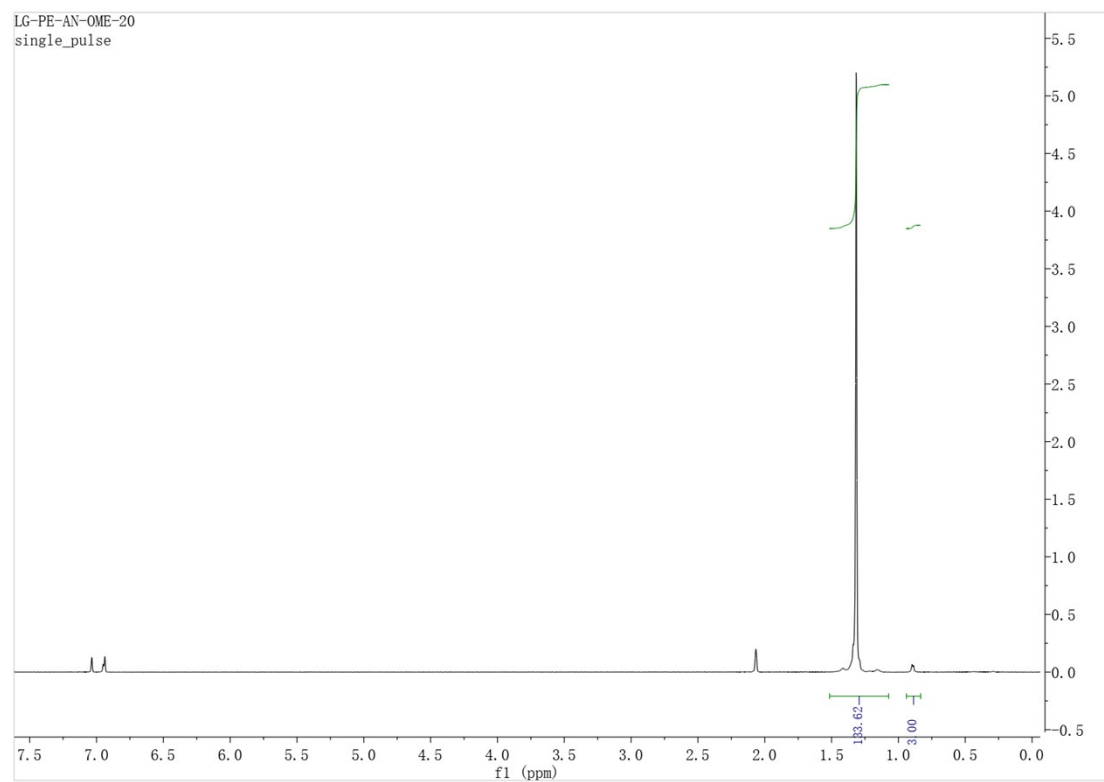

**Figure S54.**  $^1\text{H}$  NMR spectrum of the polymer from table 1, entry 1 ( $\text{d}^8$ -toluene, 100 °C).

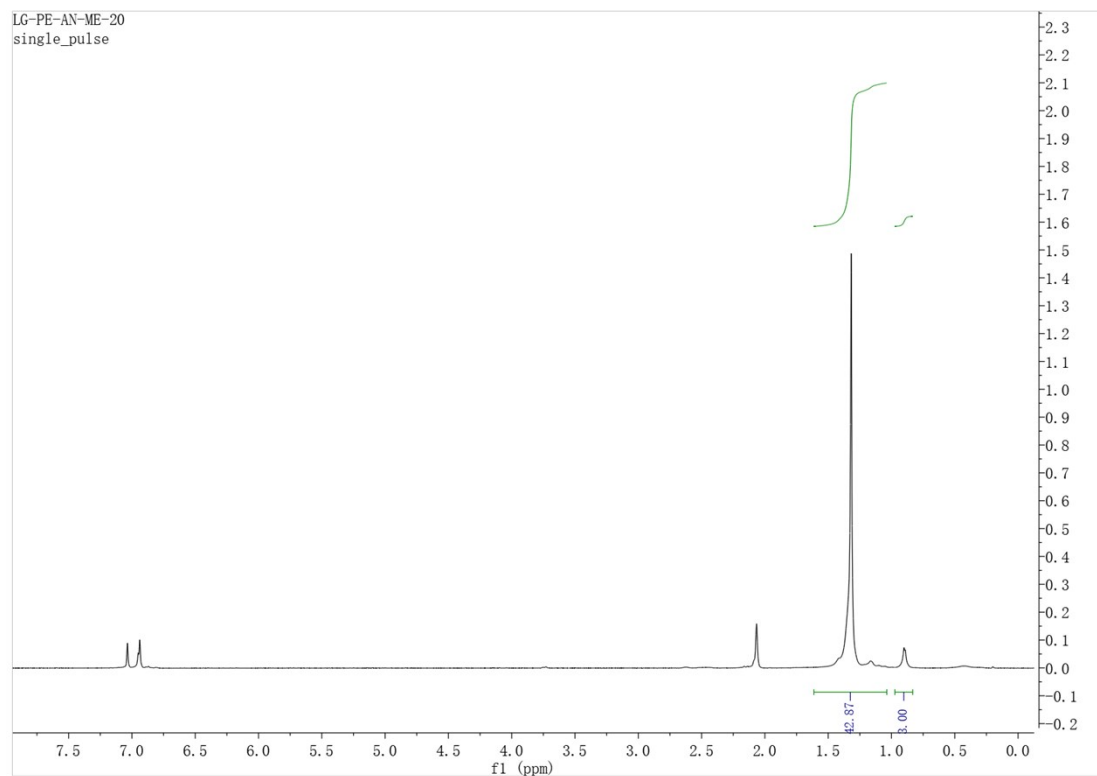

**Figure S55.** <sup>1</sup>H NMR spectrum of the polymer from table 1, entry 5 (d<sup>8</sup>-toluene, 100 °C).

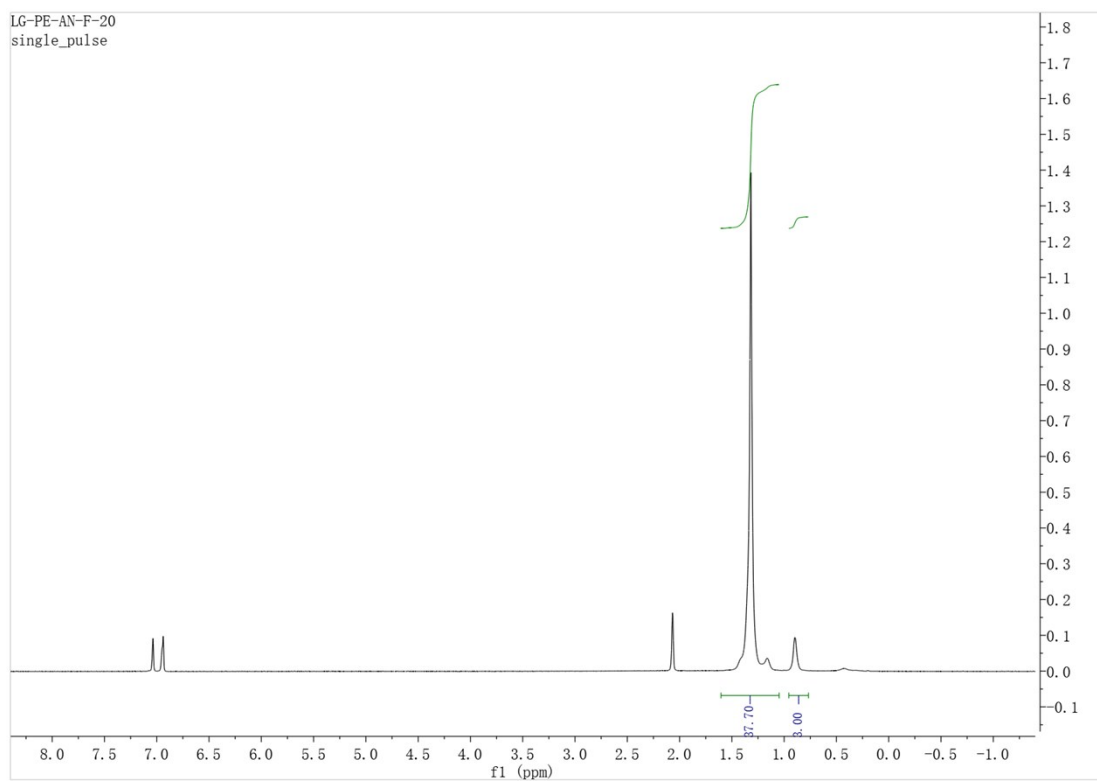

**Figure S56.** <sup>1</sup>H NMR spectrum of the polymer from table 1, entry 9 (d<sup>8</sup>-toluene, 100 °C).

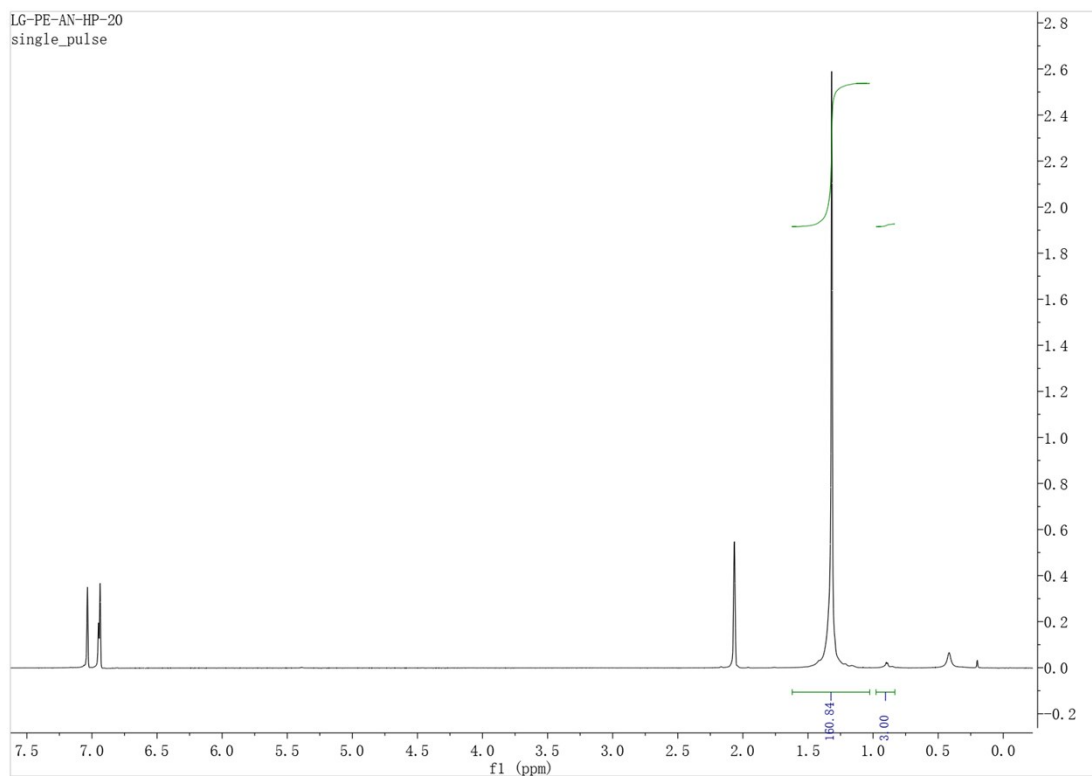

**Figure S57.**  $^1\text{H}$  NMR spectrum of the polymer from table 1, entry 13 ( $\text{d}^8$ -toluene,  $100\text{ }^\circ\text{C}$ ).

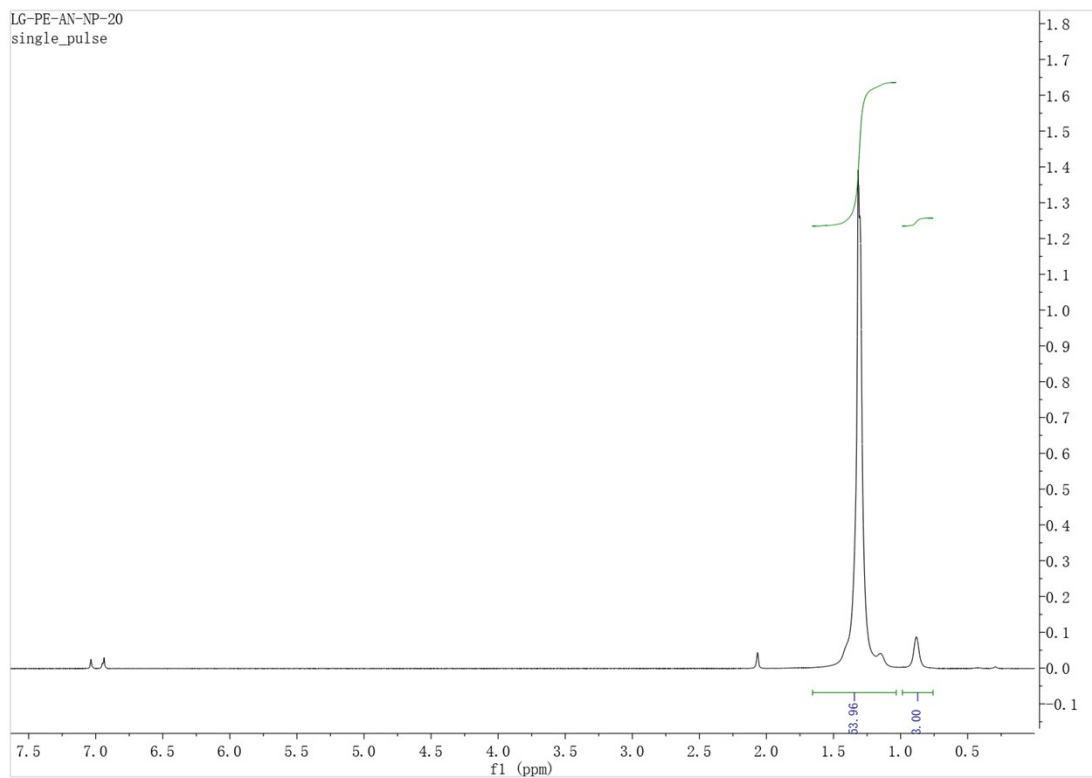

**Figure S58.**  $^1\text{H}$  NMR spectrum of the polymer from table 1, entry 17 ( $\text{d}^8$ -toluene,  $100\text{ }^\circ\text{C}$ ).

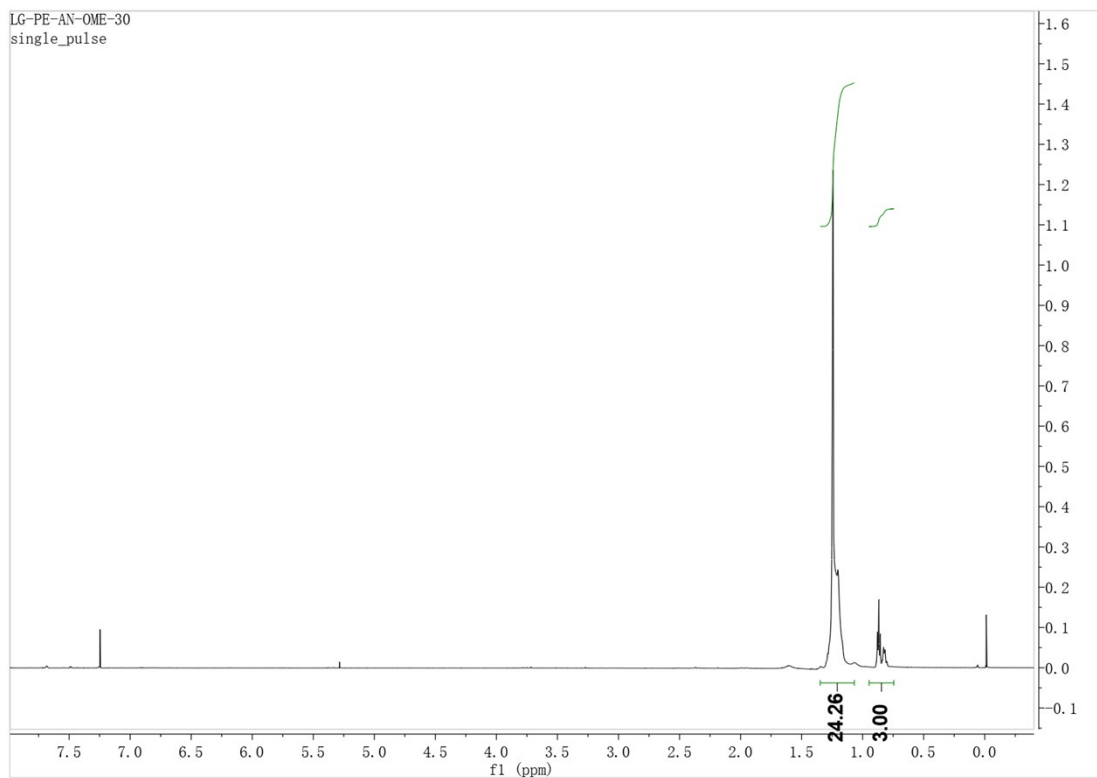

**Figure S59.**  $^1\text{H}$  NMR spectrum of the polymer from table 2, entry 1 ( $\text{CDCl}_3$ , 20  $^\circ\text{C}$ ).

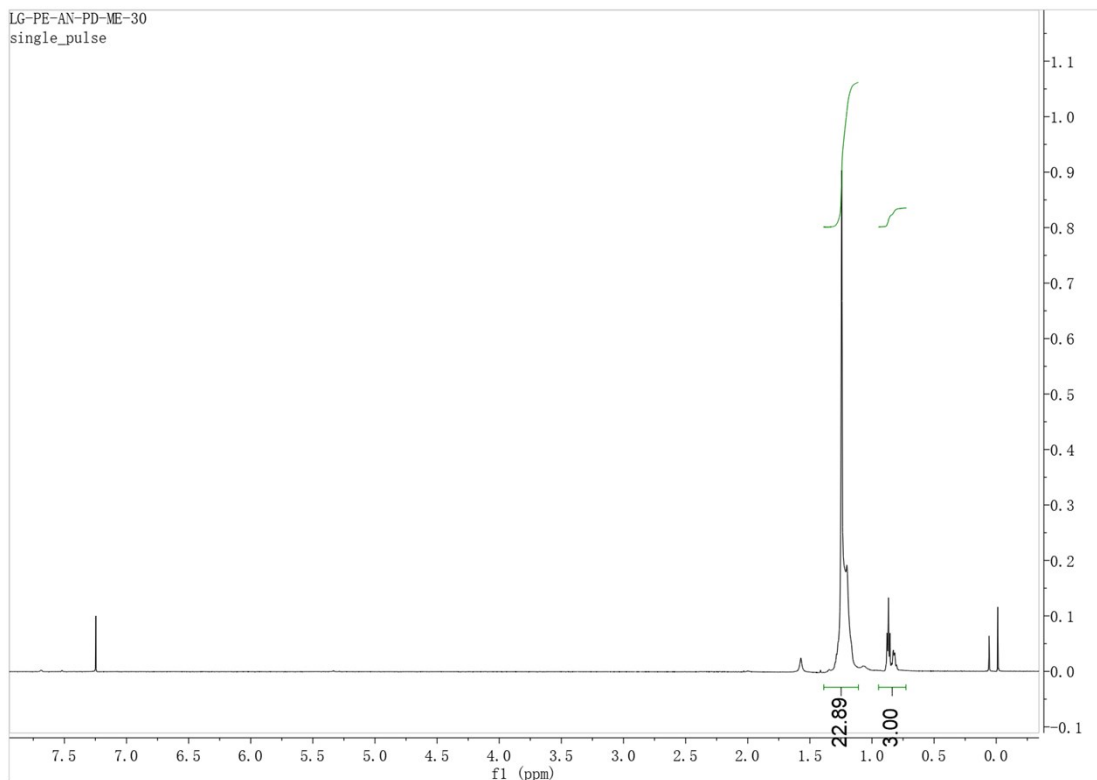

**Figure S60.**  $^1\text{H}$  NMR spectrum of the polymer from table 2, entry 4 ( $\text{CDCl}_3$ , 20  $^\circ\text{C}$ ).

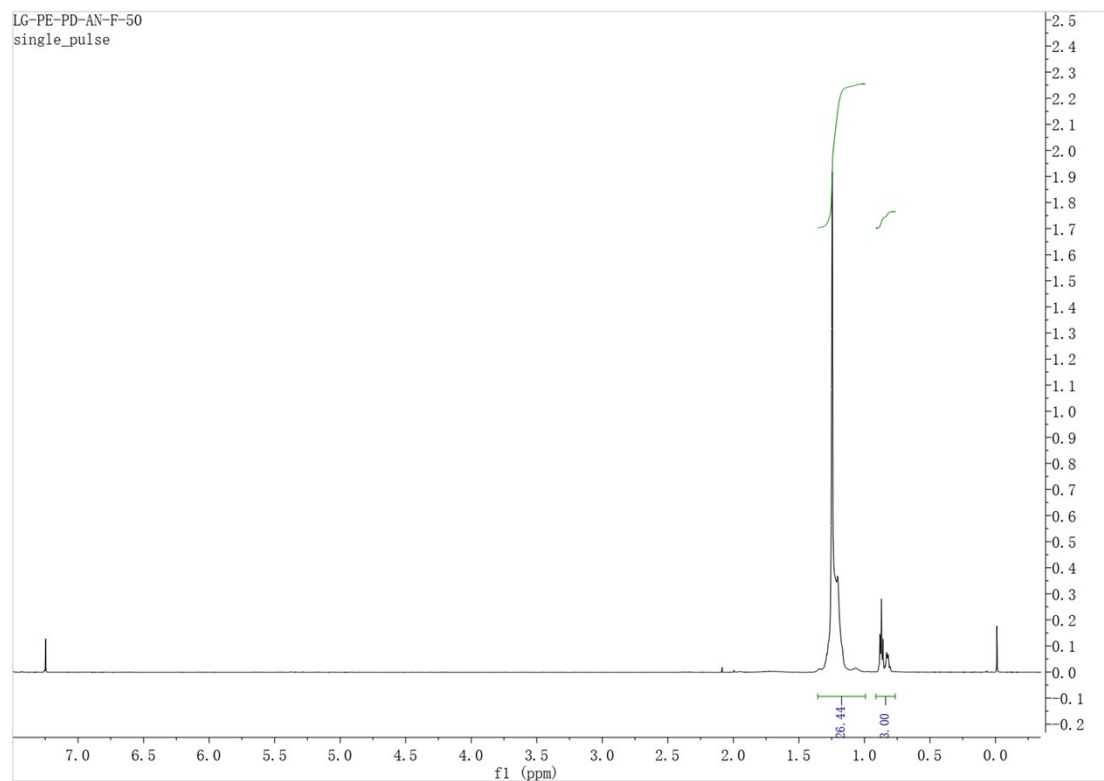

**Figure S61.**  $^1\text{H}$  NMR spectrum of the polymer from table 2, entry 7 ( $\text{CDCl}_3$ , 20  $^\circ\text{C}$ ).

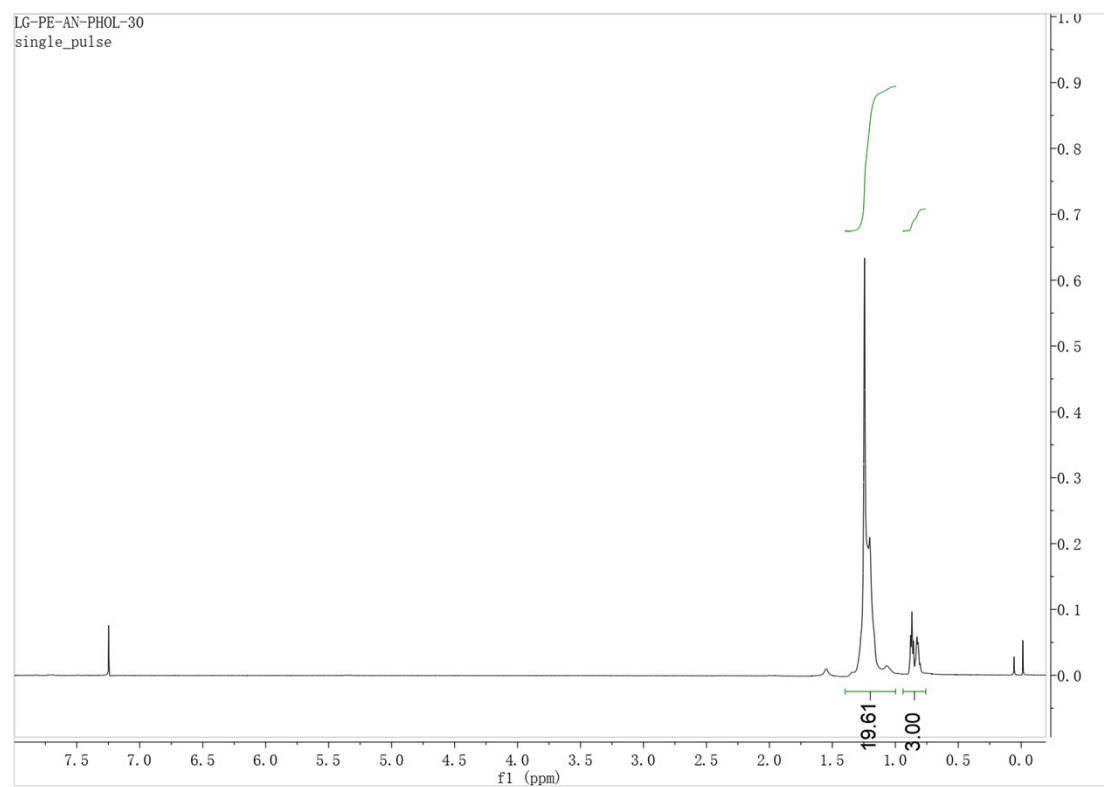

**Figure S62.**  $^1\text{H}$  NMR spectrum of the polymer from table 2, entry 10 ( $\text{CDCl}_3$ , 20  $^\circ\text{C}$ ).

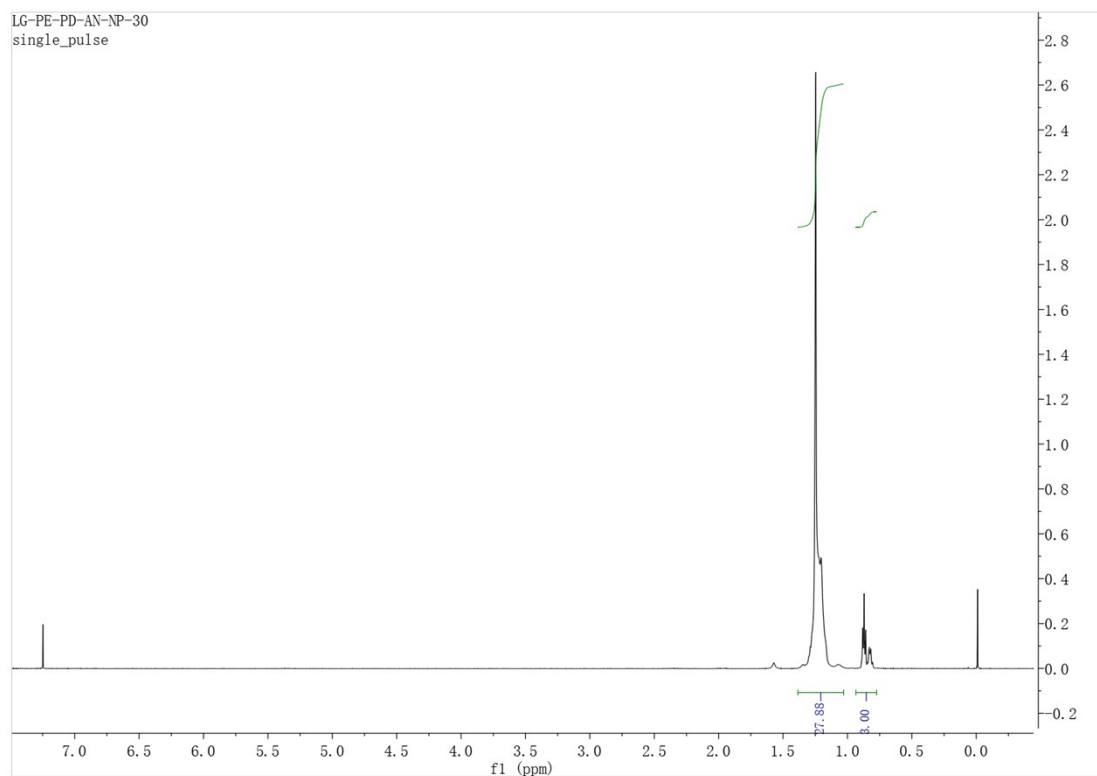

**Figure S63.**  $^1\text{H}$  NMR spectrum of the polymer from table 2, entry 13 ( $\text{CDCl}_3$ , 20  $^\circ\text{C}$ ).

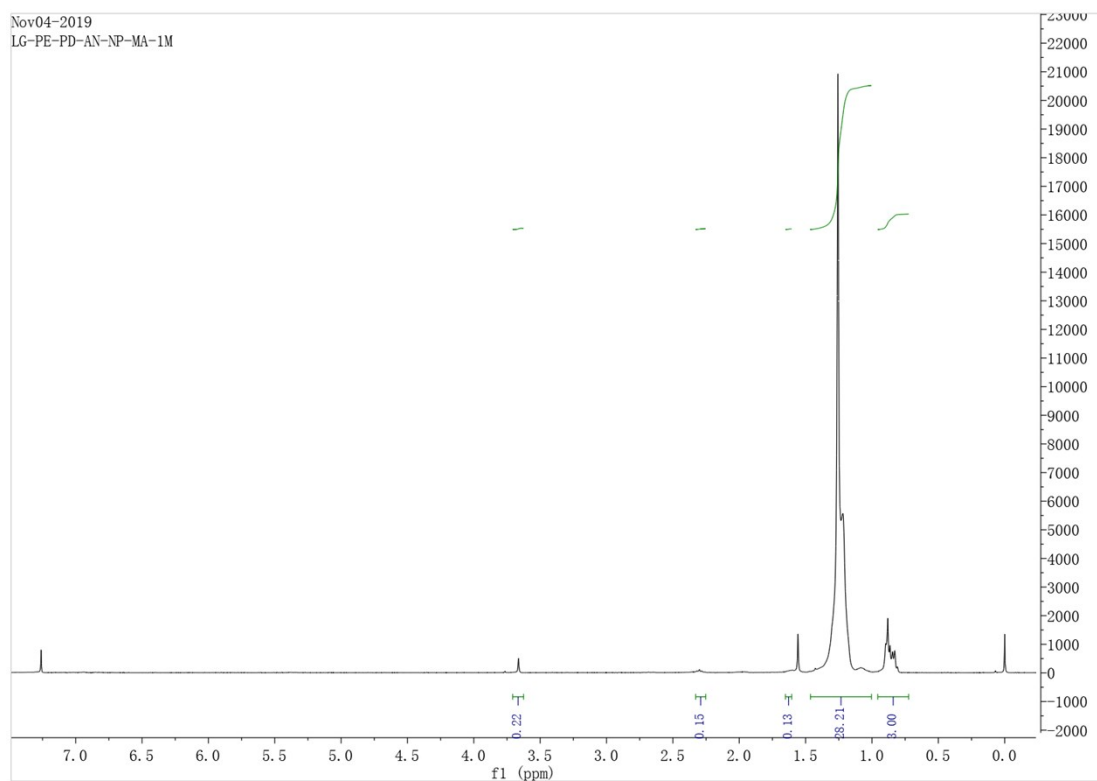

**Figure S64.**  $^1\text{H}$  NMR spectrum of the polymer from table 3, entry 10 ( $\text{CDCl}_3$ , 20  $^\circ\text{C}$ ).

### 3.4 DSC, GPC of Polymers and Copolymers.

Sample: xLG-Ni-An-OME-20  
Size: 4.9000 mg

DSC

File: C:\...20191023\xLG-Ni-An-OME-20.002  
Operator: Jeremy  
Run Date: 23-Oct-2019 11:26  
Instrument: DSC Q20 V24.11 Build 124

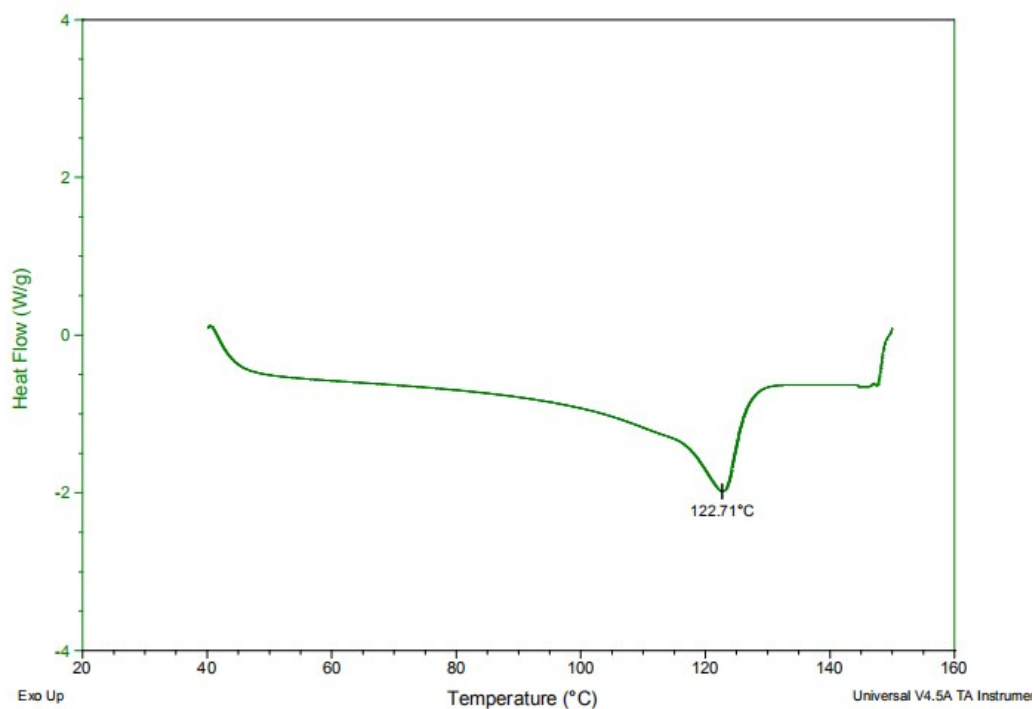

Figure S65. DSC of the polymer from table 1, entry 1.

Sample: xLG-Ni-An-OME-40  
Size: 5.7000 mg

DSC

File: C:\...20191023\xLG-Ni-An-OME-40.001  
Operator: Jeremy  
Run Date: 23-Oct-2019 12:33  
Instrument: DSC Q20 V24.11 Build 124

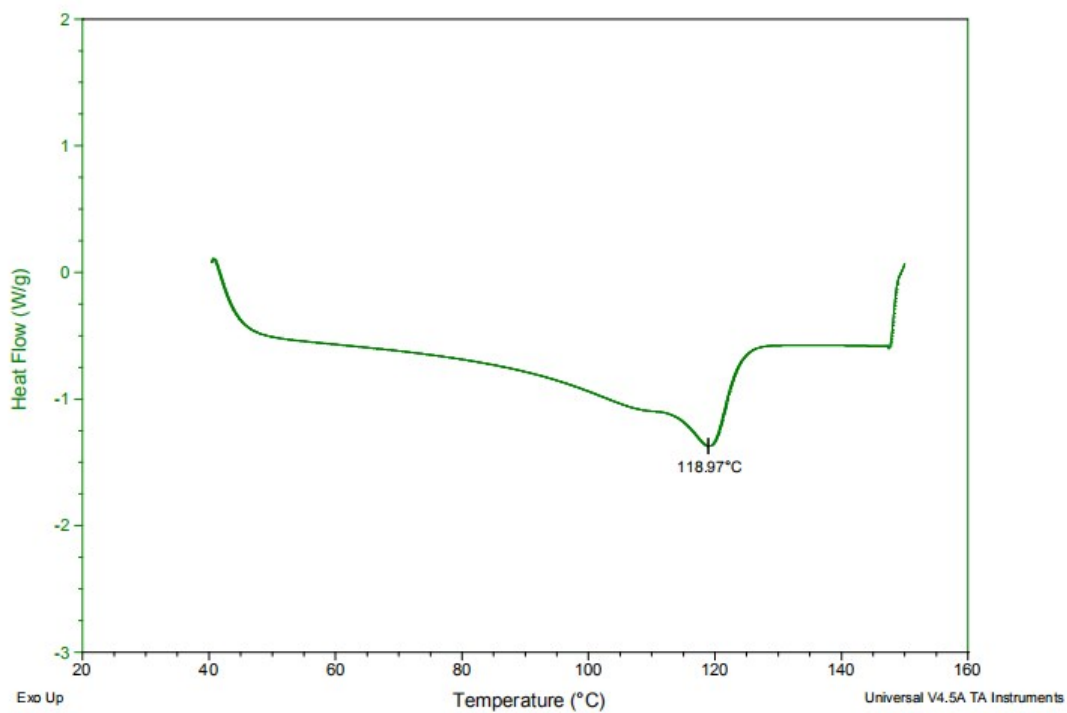

Figure S66. DSC of the polymer from table 1, entry 2.



Sample: xLG-Ni-An-OME-60  
Size: 5.0000 mg

DSC

File: C:\...20191023\xLG-Ni-An-OME-60.001  
Operator: Jeremy  
Run Date: 24-Oct-2019 16:47  
Instrument: DSC Q20 V24.11 Build 124

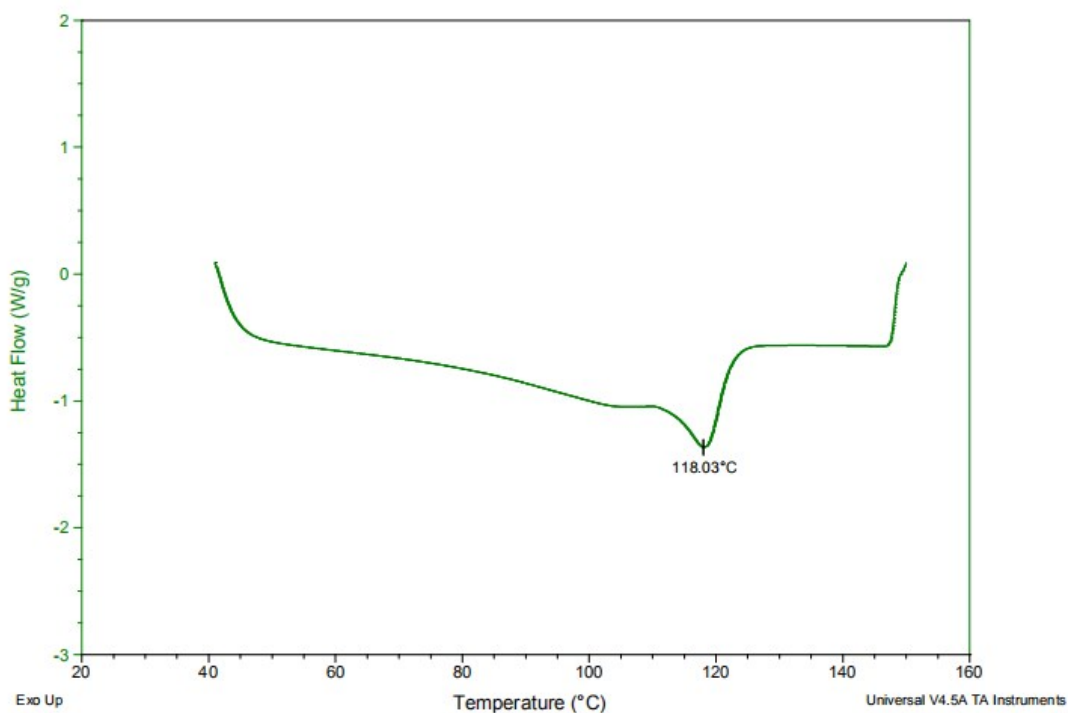

Figure S67. DSC of the polymer from table 1, entry 3.

Sample: xLG-Ni-An-ME-20  
Size: 4.8000 mg

DSC

File: C:\...20191023\xLG-Ni-An-ME-20.001  
Operator: Jeremy  
Run Date: 23-Oct-2019 18:21  
Instrument: DSC Q20 V24.11 Build 124

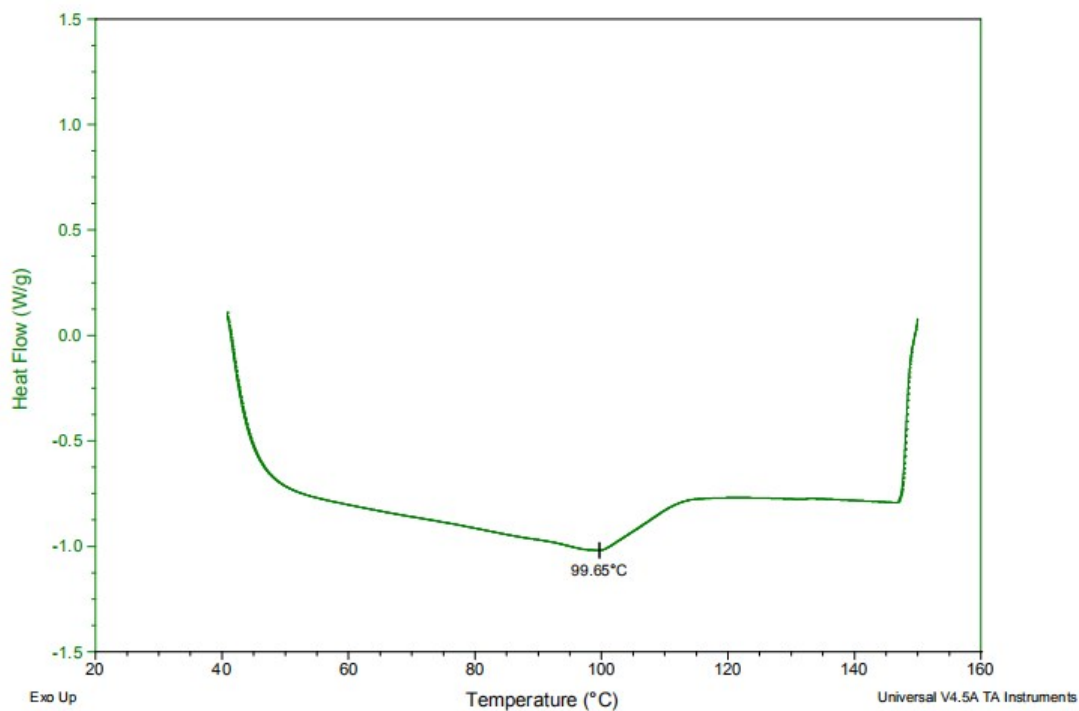

Figure S68. DSC of the polymer from table 1, entry 5.

Sample: xLG-Ni-An-ME-40  
Size: 5.6000 mg

DSC

File: C:\...\20191023\xLG-Ni-An-ME-40.001  
Operator: Jeremy  
Run Date: 23-Oct-2019 19:29  
Instrument: DSC Q20 V24.11 Build 124

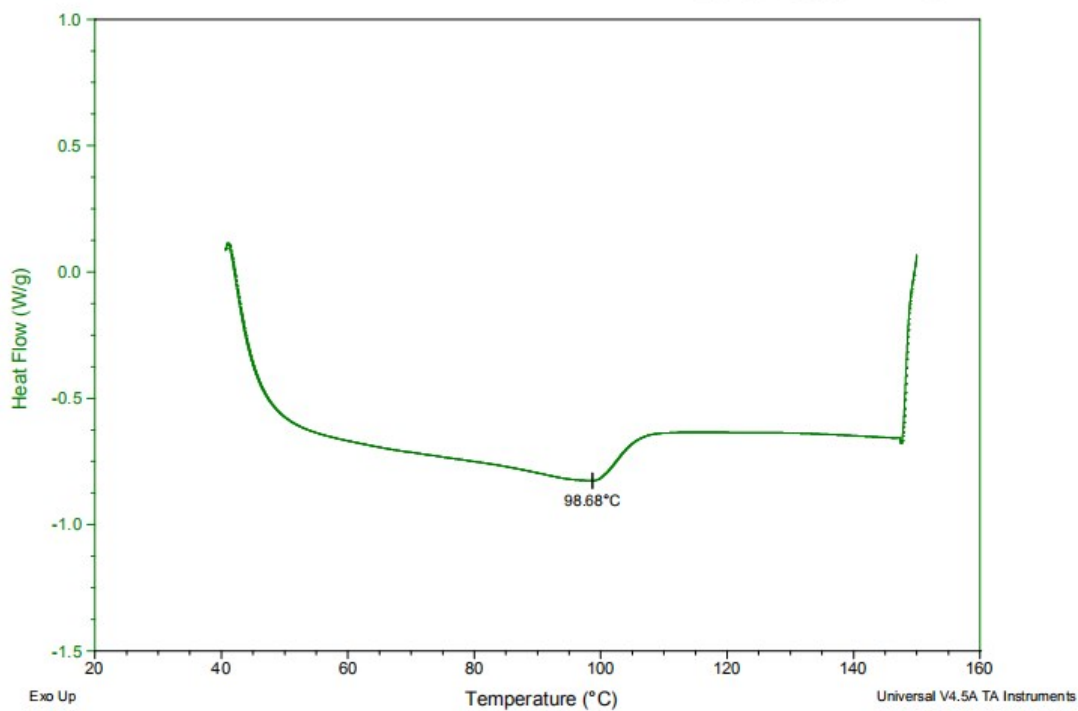

Figure S69. DSC of the polymer from table 1, entry 6.

Sample: xLG-Ni-An-ME-60  
Size: 5.4000 mg  
Method: gjx-nime2cf3-80

DSC

File: C:\...\20191027\xLG-Ni-An-ME-60.001  
Operator: Jeremy  
Run Date: 27-Oct-2019 16:19  
Instrument: DSC Q20 V24.11 Build 124

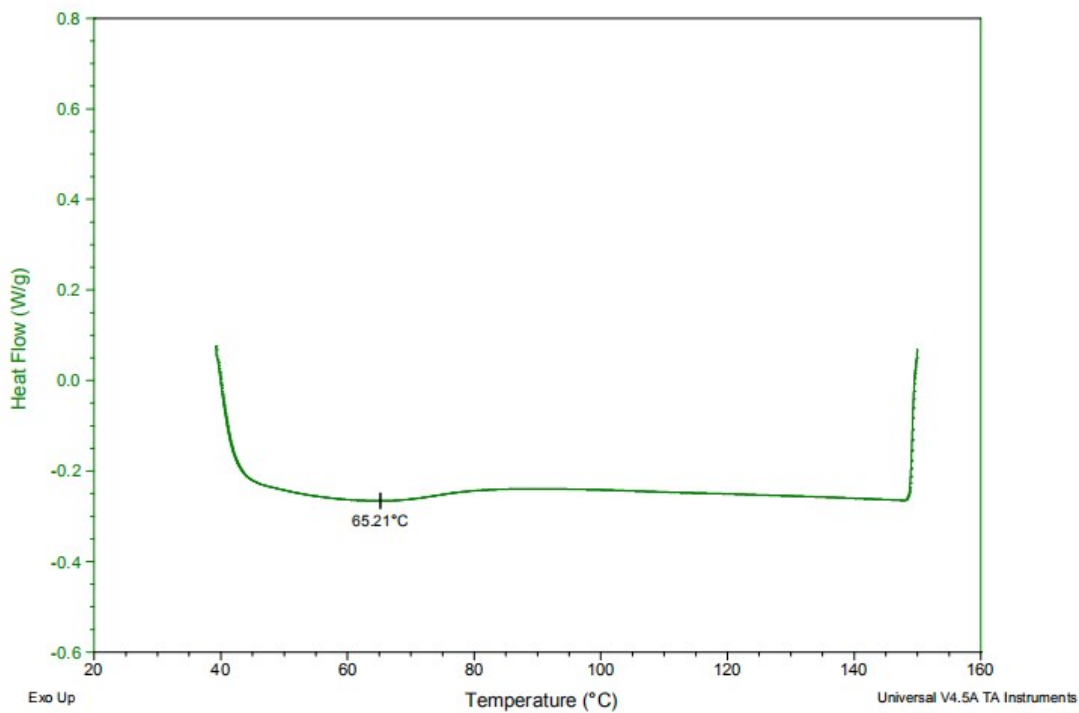

Figure S70. DSC of the polymer from table 1, entry 7.

Sample: xLG-Ni-An-F-20  
Size: 5.4000 mg

DSC

File: C:\...20191023xLG-Ni-An-F-20.001  
Operator: Jeremy  
Run Date: 23-Oct-2019 15:53  
Instrument: DSC Q20 V24.11 Build 124

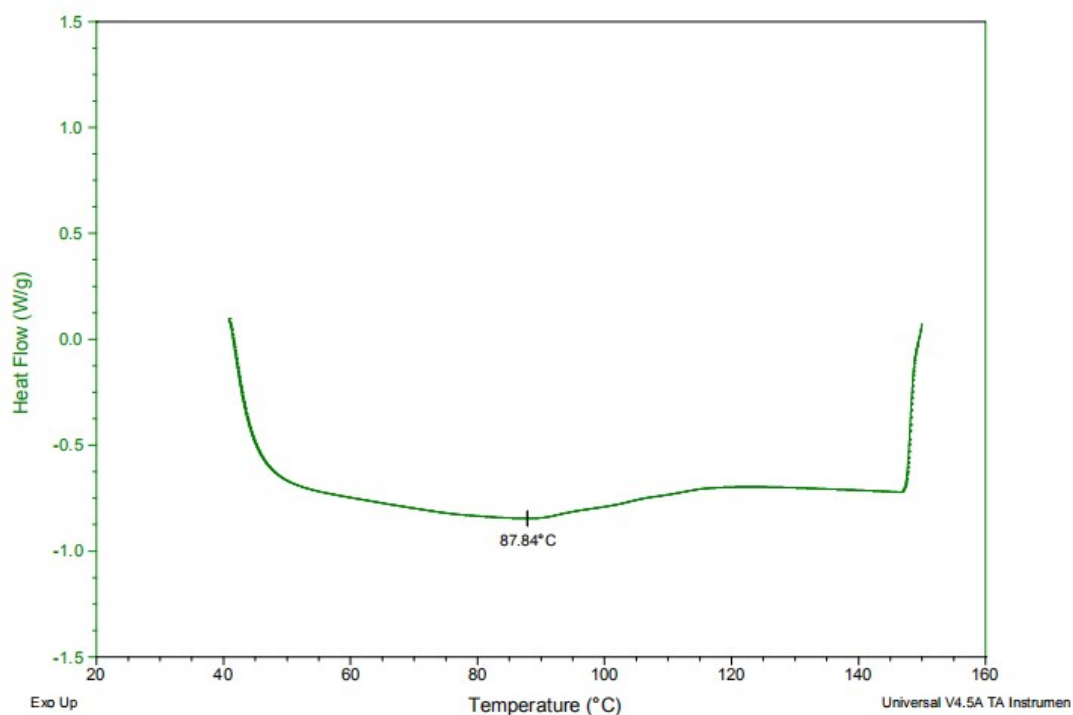

Figure S71. DSC of the polymer from table 1, entry 9.

Sample: xLG-Ni-An-F-60  
Size: 5.3000 mg  
Method: gjx-nime2cf3-80

DSC

File: C:\...20191027xLG-Ni-An-F-60.001  
Operator: Jeremy  
Run Date: 27-Oct-2019 18:56  
Instrument: DSC Q20 V24.11 Build 124

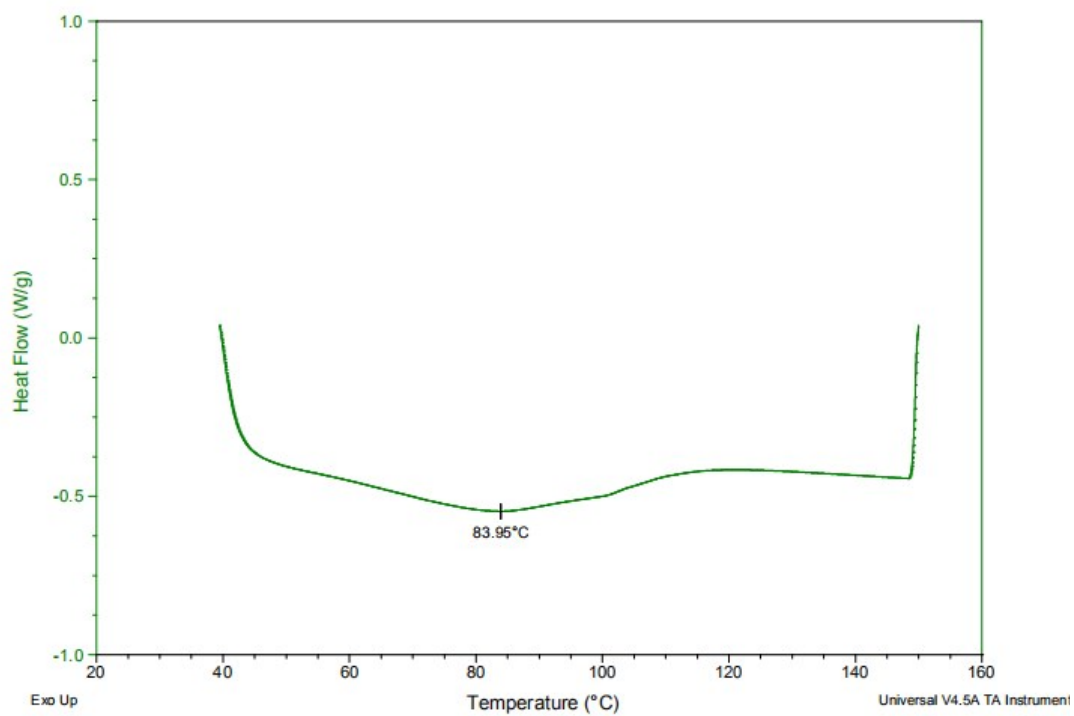

Figure S72. DSC of the polymer from table 1, entry 10.

Sample: xLG-Ni-An-Phoh-20  
Size: 4.7000 mg

DSC

File: C:\...20191023\xLG-Ni-An-Phol-20.001  
Operator: Jeremy  
Run Date: 24-Oct-2019 12:11  
Instrument: DSC Q20 V24.11 Build 124

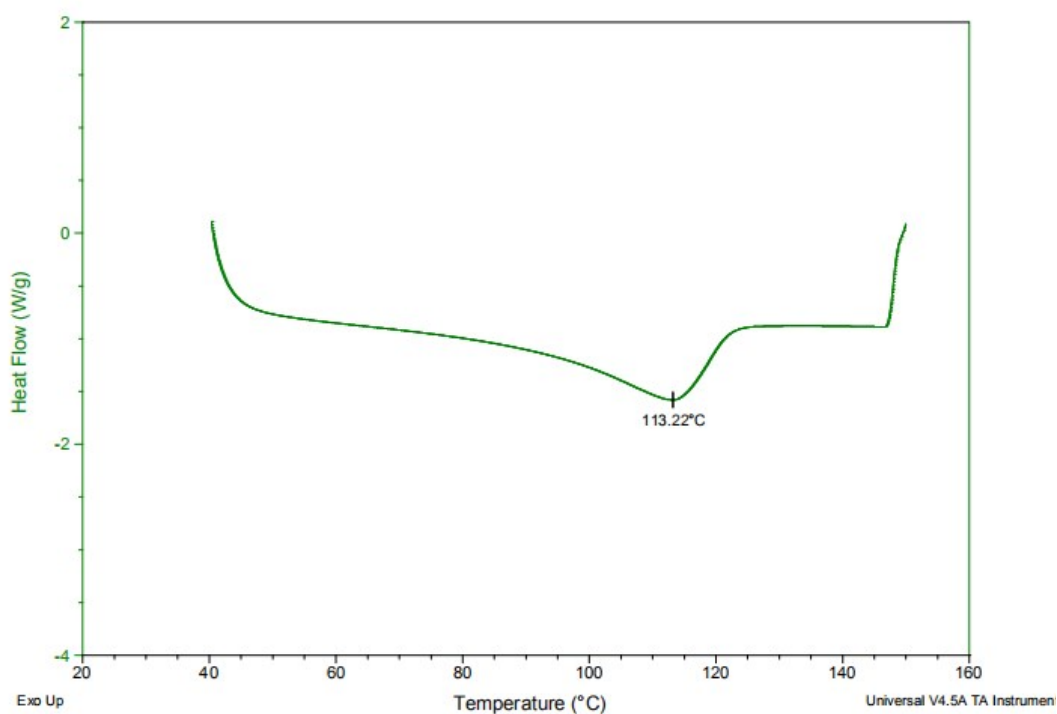

Figure S73. DSC of the polymer from table 1, entry 13.

Sample: xLG-Ni-An-Phol-40  
Size: 4.7000 mg

DSC

File: C:\...20191023\xLG-Ni-An-Phol-40.001  
Operator: Jeremy  
Run Date: 24-Oct-2019 13:30  
Instrument: DSC Q20 V24.11 Build 124

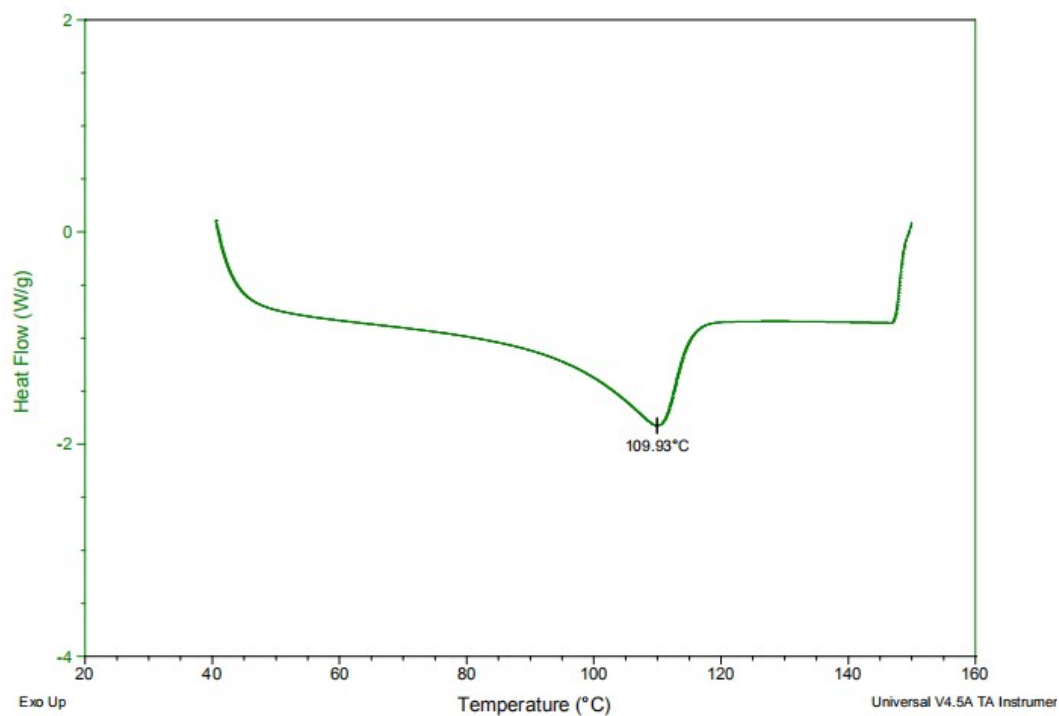

Figure S74. DSC of the polymer from table 1, entry 14.

Sample: xLG-Ni-An-PHOL-60  
Size: 5.0000 mg

DSC

File: C:\...20191023xLG-Ni-An-PHOL-60.001  
Operator: Jeremy  
Run Date: 24-Oct-2019 19:13  
Instrument: DSC Q20 V24.11 Build 124

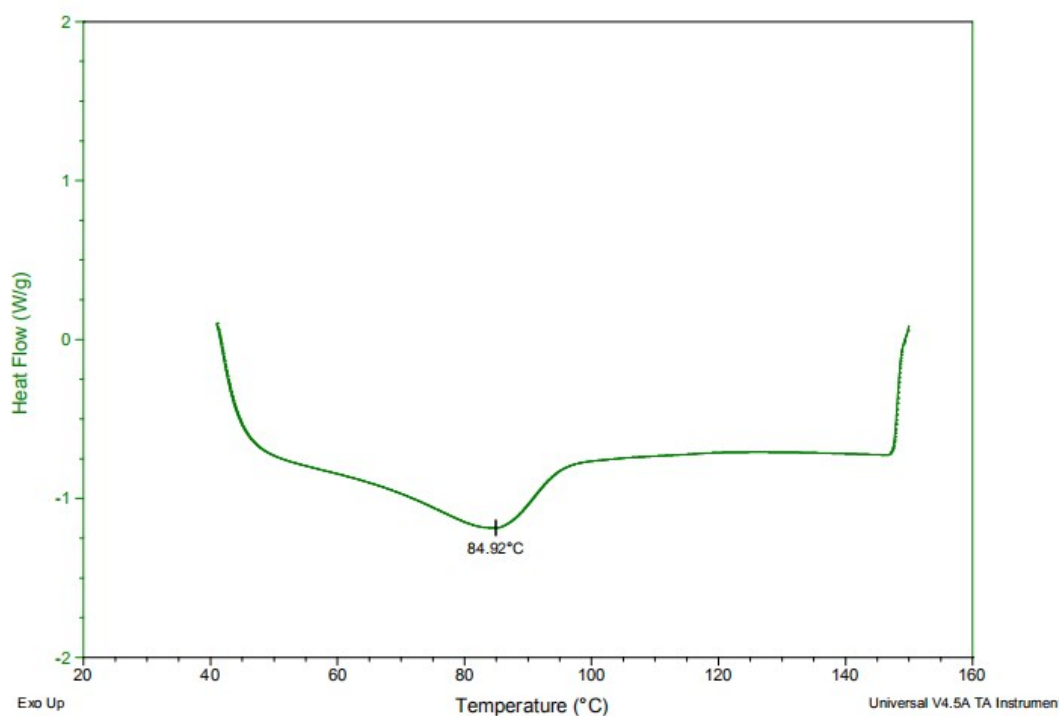

Figure S75. DSC of the polymer from table 1, entry 15.

Sample: xLG-Ni-An-PHOL-80  
Size: 4.9000 mg  
Method: gjx-nime2cf3-80

DSC

File: C:\...20191027xLG-Ni-An-PHOL-80.003  
Operator: Jeremy  
Run Date: 27-Oct-2019 11:32  
Instrument: DSC Q20 V24.11 Build 124

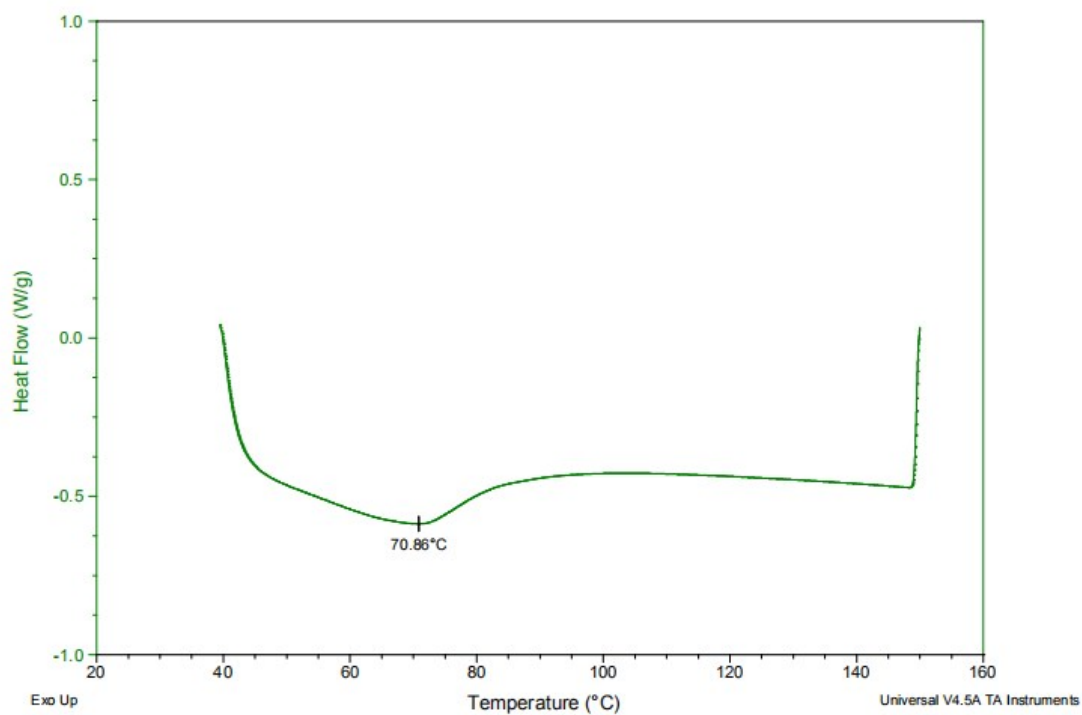

Figure S76. DSC of the polymer from table 1, entry 16.

Sample: xLG-Ni-An-Np-20  
Size: 5.4000 mg

DSC

File: C:\...20191023\xLG-Ni-An-Np-20.001  
Operator: Jeremy  
Run Date: 23-Oct-2019 13:40  
Instrument: DSC Q20 V24.11 Build 124

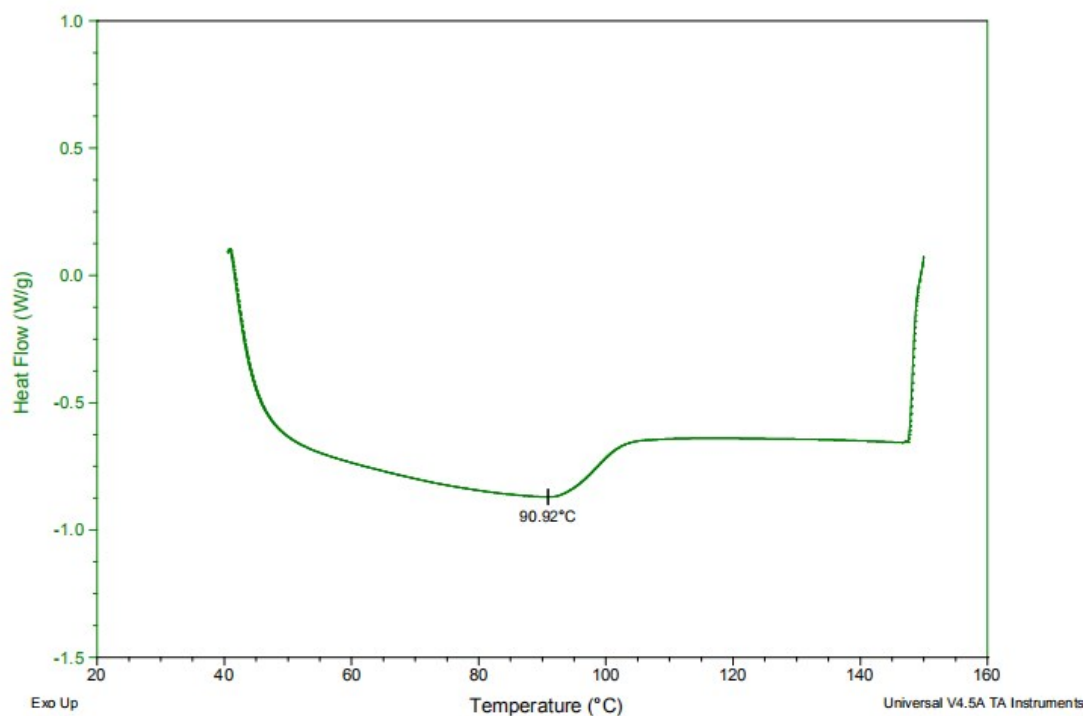

Figure S77. DSC of the polymer from table 1, entry 17.

Sample: xLG-Ni-An-Np-40  
Size: 4.7000 mg

DSC

File: C:\...20191023\xLG-Ni-An-Np-40.001  
Operator: Jeremy  
Run Date: 23-Oct-2019 14:45  
Instrument: DSC Q20 V24.11 Build 124

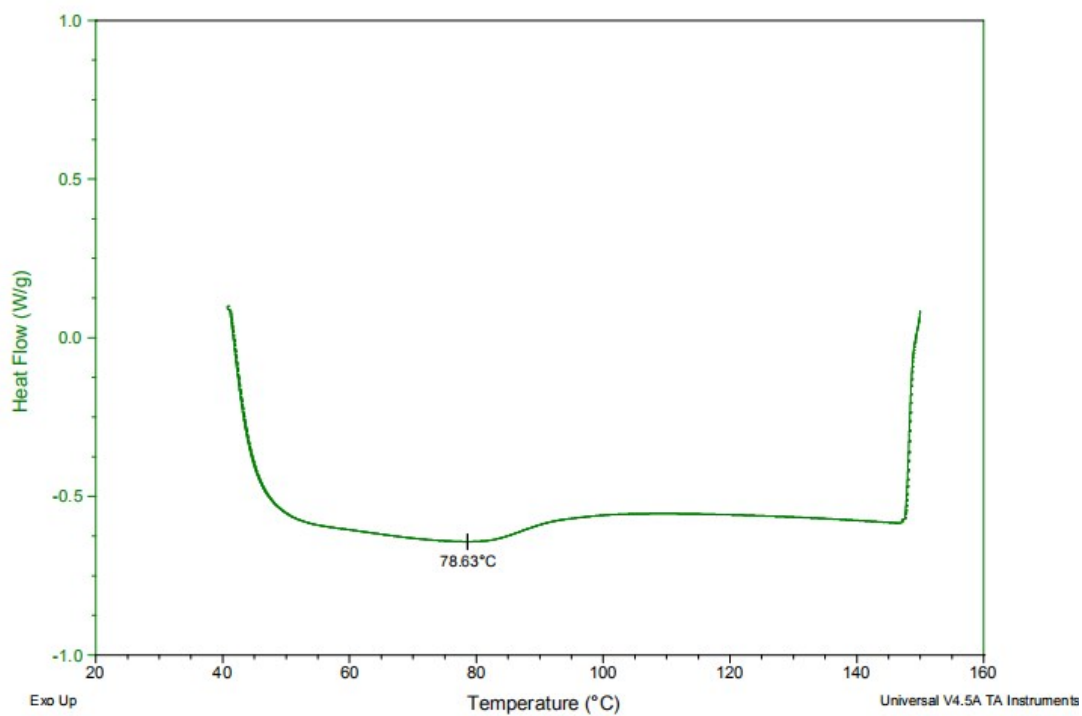

Figure S78. DSC of the polymer from table 1, entry 18.

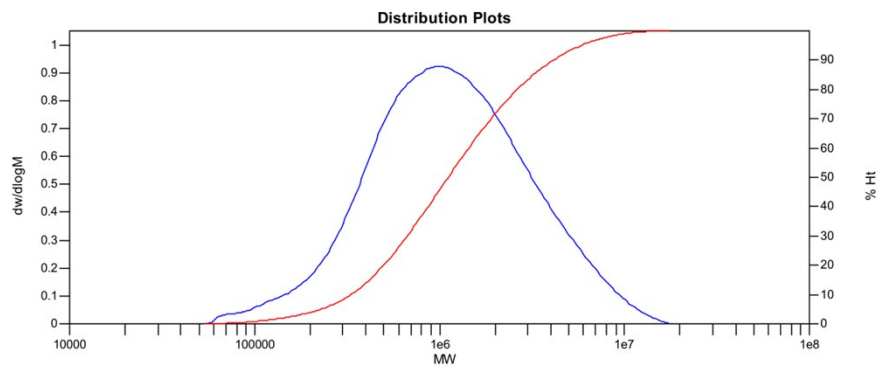

**MW Averages**

| Peak No | Mp     | Mn     | Mw      | Mz      | Mz+1    | Mv      | PD      |
|---------|--------|--------|---------|---------|---------|---------|---------|
| 1       | 970027 | 686954 | 1771735 | 3903645 | 6463523 | 1541234 | 2.57912 |

**Processed Peaks**

| Peak No | Name | Start RT (mins) | Max RT (mins) | End RT (mins) | Pk Height (mV) | % Height | Area (mV.secs) | % Area |
|---------|------|-----------------|---------------|---------------|----------------|----------|----------------|--------|
| 1       |      | 10.30           | 12.13         | 14.05         | -36.7364       | 100      | 3506.59        | 100    |

**Figure S79.** GPC of the polymer from table 1, entry 16.

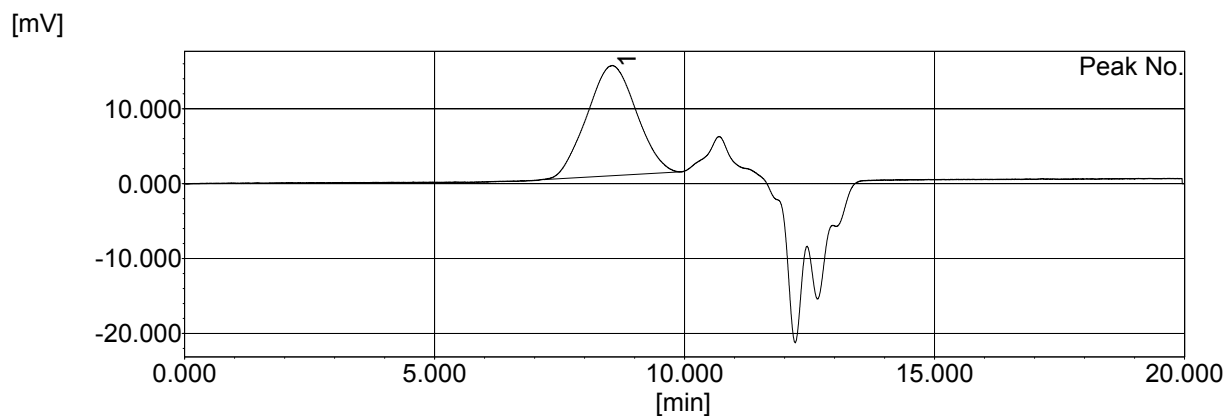

**Result of molecular weight calculation (RI)**

Peak 1 Base Peak

|               | [min] | [mV]   | [mol]       |         |        |
|---------------|-------|--------|-------------|---------|--------|
| Peak start    | 7.192 | 0.536  |             | Mn      | 12,420 |
|               |       |        | 117,871     | Mw      | 19,346 |
| Peak top      | 8.552 | 15.792 | 15,451      | Mz      | 28,897 |
| Peak end      | 9.937 | 1.587  | 1,951       | Mz+1    | 39,946 |
|               |       |        |             | Mv      | 19,346 |
| Height [mV]   |       |        | 14.735      | Mp      | 15,451 |
| Area [mV*sec] |       |        | 1012.552    | Mz/Mw   | 1.494  |
| Area% [%]     |       |        | 100.000     | Mw/Mn   | 1.558  |
| [eta]         |       |        | 19345.92047 | Mz+1/Mw | 2.065  |

**Figure S80.** GPC of the polymer from table 1, entry 6.

## 4. References

- 1, Guo, L. H.; Kong, W. Y.; Xu, Y. J.; Yang, Y. L.; Ma, R.; Cong, L.; Dai, S. Y.; Liu, Z. Large-scale synthesis of novel sterically hindered acenaphthene-based  $\alpha$ -diimine ligands and their application in coordination chemistry. *J. Organomet. Chem.* **2018**, *859*, 58-67.
- 2, Young, M. C.; Johnson, A. M.; Hooley, R. J. Self-promoted post-synthetic modification of metal–ligand  $M_2L_3$  mesocates. *Chemical Communications* **2014**, *50*, 1378-1380.
- 3, Dai, S. Y.; Chen, C. L. Direct synthesis of functionalized high-molecular-weight polyethylene by copolymerization of ethylene with polar monomers. *Angew. Chem. Int. Ed.* **2016**, *55*, 13281-13285.

## 5. X-ray Crystallography

CCDC number of **Ni2**, **Ni5**, **Pd4** and **Pd5** are 2062231-2062234. The data can be obtained free of charge from the Cambridge Crystallographic Data Centre via [www.ccdc.cam.ac.uk/data\\_request/cif](http://www.ccdc.cam.ac.uk/data_request/cif).

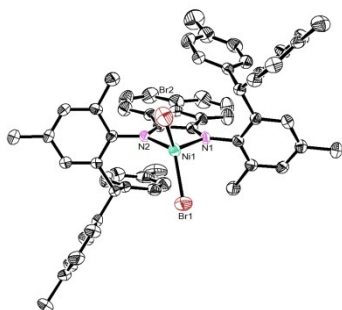

|                     |                                                                                            |
|---------------------|--------------------------------------------------------------------------------------------|
| Identification code | <b>Ni2</b>                                                                                 |
| Empirical formula   | C <sub>59.25</sub> H <sub>54.50</sub> Br <sub>2</sub> Cl <sub>2.50</sub> N <sub>2</sub> Ni |
| Formula weight      | 1101.70                                                                                    |
| Temperature/K       | 298(2) K                                                                                   |
| Crystal system      | Monoclinic                                                                                 |
| Space group         | P2(1)/n                                                                                    |
| a/Å                 | 15.1086(14)                                                                                |
| b/Å                 | 19.8115(17)                                                                                |
| c/Å                 | 19.2127(16)                                                                                |
| $\alpha$ /°         | 90                                                                                         |



|                                                |                                                                    |
|------------------------------------------------|--------------------------------------------------------------------|
| $\beta/^\circ$                                 | 93.602(2)                                                          |
| $\gamma/^\circ$                                | 90                                                                 |
| Volume/ $\text{\AA}^3$                         | 5739.5(9)                                                          |
| Z                                              | 4                                                                  |
| $\rho_{\text{calc}}/\text{g/cm}^3$             | 1.275                                                              |
| $\mu/\text{mm}^{-1}$                           | 1.883                                                              |
| F(000)                                         | 2258                                                               |
| Crystal size/ $\text{mm}^3$                    | 0.42 x 0.40 x 0.25                                                 |
| Radiation                                      | MoK $\alpha$ ( $\lambda = 0.71073$ )                               |
| 2 $\Theta$ range for data collection/ $^\circ$ | 2.31 to 25.02                                                      |
| Index ranges                                   | -17 $\leq h \leq 17$ , -23 $\leq k \leq 22$ , -22 $\leq l \leq 12$ |
| Reflections collected                          | 28553                                                              |
| Independent reflections                        | 10081 [R(int) = 0.0781]                                            |
| Data/restraints/parameters                     | 10081 / 60 / 654                                                   |
| Goodness-of-fit on F <sup>2</sup>              | 1.083                                                              |
| Final R indexes [I $\geq 2\sigma$ (I)]         | R1 = 0.0697, wR2 = 0.2153                                          |
| Final R indexes [all data]                     | R1 = 0.1506, wR2 = 0.2354                                          |
| Largest diff. peak/hole / e $\text{\AA}^{-3}$  | 1.005 and -0.462                                                   |

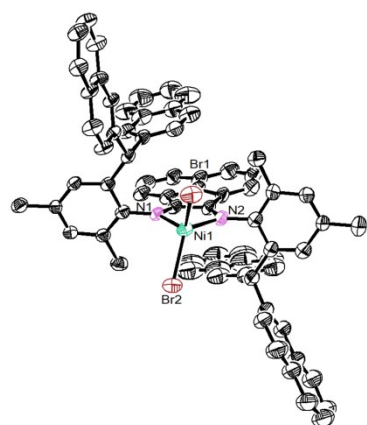

| <b>Table S3. Crystal data and structure refinement for Ni5.</b> |                   |
|-----------------------------------------------------------------|-------------------|
| Identification code                                             | <b>Ni5</b>        |
| Empirical formula                                               | C70 H52 Br2 N2 Ni |
| Formula weight                                                  | 1139.67           |
| Temperature/K                                                   | 298(2) K          |
| Crystal system                                                  | Triclinic         |
| Space group                                                     | P-1               |
| a/ $\text{\AA}$                                                 | 17.6855(16)       |
| b/ $\text{\AA}$                                                 | 19.5147(18)       |

|                                             |                                                                        |
|---------------------------------------------|------------------------------------------------------------------------|
| c/Å                                         | 21.7741(19)                                                            |
| $\alpha$ /°                                 | 66.1380(10)                                                            |
| $\beta$ /°                                  | 87.031(3)                                                              |
| $\gamma$ /°                                 | 70.111(2)                                                              |
| Volume/Å <sup>3</sup>                       | 6430.3(10)                                                             |
| Z                                           | 4                                                                      |
| $\rho_{\text{calc}}$ /g/cm <sup>3</sup>     | 1.177                                                                  |
| $\mu$ /mm <sup>-1</sup>                     | 1.583                                                                  |
| F(000)                                      | 2336                                                                   |
| Crystal size/mm <sup>3</sup>                | 0.20 x 0.17 x 0.04                                                     |
| Radiation                                   | MoK $\alpha$ ( $\lambda$ = 0.71073)                                    |
| 2 $\theta$ range for data collection/°      | 2.15 to 25.02                                                          |
| Index ranges                                | -21 $\leq$ h $\leq$ 19, -20 $\leq$ k $\leq$ 23, -24 $\leq$ l $\leq$ 25 |
| Reflections collected                       | 33040                                                                  |
| Independent reflections                     | 22376 [R(int) = 0.0997]                                                |
| Data/restraints/parameters                  | 22376 / 0 / 1359                                                       |
| Goodness-of-fit on F <sup>2</sup>           | 1.165                                                                  |
| Final R indexes [I $\geq$ 2 $\sigma$ (I)]   | R1 = 0.1169, wR2 = 0.2321                                              |
| Final R indexes [all data]                  | R1 = 0.2212, wR2 = 0.2475                                              |
| Largest diff. peak/hole / e Å <sup>-3</sup> | 0.697 and -0.566                                                       |

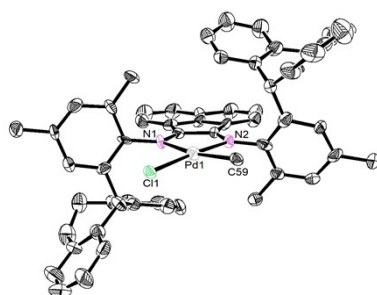

| <b>Table S4. Crystal data and structure refinement for Pd4.</b> |                  |
|-----------------------------------------------------------------|------------------|
| Identification code                                             | <b>Pd4</b>       |
| Empirical formula                                               | C59 H51 Cl N2 Pd |
| Formula weight                                                  | 929.87           |
| Temperature/K                                                   | 293(2) K         |
| Crystal system                                                  | Monoclinic       |
| Space group                                                     | P 21/c           |
| a/Å                                                             | 15.8600(16)      |
| b/Å                                                             | 16.3701(17)      |
| c/Å                                                             | 18.8102(19)      |
| $\alpha$ /°                                                     | 90               |

|                                                |                                                                |
|------------------------------------------------|----------------------------------------------------------------|
| $\beta/^\circ$                                 | 106.030(4)                                                     |
| $\gamma/^\circ$                                | 90                                                             |
| Volume/ $\text{\AA}^3$                         | 4693.8(8)                                                      |
| Z                                              | 4                                                              |
| $\rho_{\text{calc}}/\text{g/cm}^3$             | 1.316                                                          |
| $\mu/\text{mm}^{-1}$                           | 0.493                                                          |
| F(000)                                         | 1928                                                           |
| Crystal size/ $\text{mm}^3$                    | 0.170 x 0.080 x 0.030                                          |
| Radiation                                      | MoK $\alpha$ ( $\lambda = 0.71073$ )                           |
| 2 $\Theta$ range for data collection/ $^\circ$ | 1.825 to 25.020                                                |
| Index ranges                                   | -18 $\leq h \leq 18$ , 0 $\leq k \leq 19$ , 0 $\leq l \leq 22$ |
| Reflections collected                          | 8226                                                           |
| Independent reflections                        | 8226 [R(int) = ?]                                              |
| Data/restraints/parameters                     | 8226 / 14 / 576                                                |
| Goodness-of-fit on F <sup>2</sup>              | 1.039                                                          |
| Final R indexes [I $\geq 2\sigma$ (I)]         | R1 = 0.1034, wR2 = 0.1724                                      |
| Final R indexes [all data]                     | R1 = 0.2442, wR2 = 0.2036                                      |
| Largest diff. peak/hole / e $\text{\AA}^{-3}$  | 0.895 and -1.412                                               |

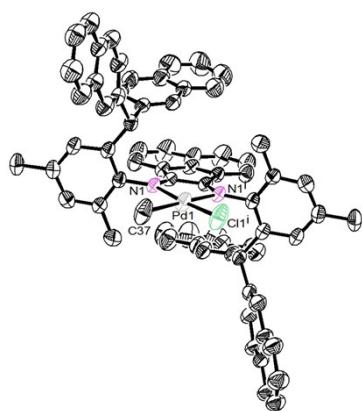

| <b>Table S5. Crystal data and structure refinement for Pd5.</b> |                  |
|-----------------------------------------------------------------|------------------|
| Identification code                                             | <b>Pd5</b>       |
| Empirical formula                                               | C71 H53 Cl N2 Pd |
| Formula weight                                                  | 1076.00          |
| Temperature/K                                                   | 298(2) K         |
| Crystal system                                                  | Monoclinic       |
| Space group                                                     | C2/c             |
| a/ $\text{\AA}$                                                 | 12.9760(11)      |
| b/ $\text{\AA}$                                                 | 19.5971(17)      |
| c/ $\text{\AA}$                                                 | 23.930(2)        |

|                                                |                                                                  |
|------------------------------------------------|------------------------------------------------------------------|
| $\alpha/^\circ$                                | 90                                                               |
| $\beta/^\circ$                                 | 96.867(2)                                                        |
| $\gamma/^\circ$                                | 90                                                               |
| Volume/ $\text{\AA}^3$                         | 6041.6(9)                                                        |
| Z                                              | 4                                                                |
| $\rho_{\text{calc}}/\text{g/cm}^3$             | 1.183                                                            |
| $\mu/\text{mm}^{-1}$                           | 0.392                                                            |
| F(000)                                         | 2224                                                             |
| Crystal size/ $\text{mm}^3$                    | 0.32 x 0.20 x 0.14                                               |
| Radiation                                      | MoK $\alpha$ ( $\lambda = 0.71073$ )                             |
| 2 $\Theta$ range for data collection/ $^\circ$ | 2.25 to 25.02                                                    |
| Index ranges                                   | -15 $\leq h \leq$ 15, -23 $\leq k \leq$ 23, -15 $\leq l \leq$ 28 |
| Reflections collected                          | 15259                                                            |
| Independent reflections                        | 5317 [R(int) = 0.0890]                                           |
| Data/restraints/parameters                     | 5317 / 246 / 371                                                 |
| Goodness-of-fit on F <sup>2</sup>              | 1.039                                                            |
| Final R indexes [I $\geq$ 2 $\sigma$ (I)]      | R1 = 0.0674, wR2 = 0.1670                                        |
| Final R indexes [all data]                     | R1 = 0.1074, wR2 = 0.1812                                        |
| Largest diff. peak/hole / e $\text{\AA}^{-3}$  | 0.555 and -0.927                                                 |
